# Supplementary material for: Cold-induced hyperphagia requires AgRP neuron activation in mice
Source: eLife journal article supplement (doi:10.7554/elife.58764), 2020-12-15
Supplement: supp [file elife-58764-supp-v1.zip]

Archive with 16 entries (16 files):
- elife_poa_e58764_Figure_1_source_data_1.xlsx
- elife_poa_e58764_Figure_2_source_data_1.xlsx
- elife_poa_e58764_Figure_3_source_data_1.xlsx
- elife_poa_e58764_Figure_4_source_data_1.xlsx
- elife_poa_e58764_Figure_5_source_data_1.xlsx
- elife_poa_e58764_Figure_2_figure_supplement_1.tif
- elife_poa_e58764_Figure_3_figure_supplement_1.tif
- elife_poa_e58764_Figure_3_figure_supplement_2.tif
- elife_poa_e58764_Figure_4_figure_supplement_1.tif
- elife_poa_e58764_Figure_4_figure_supplement_2.tif
- elife_poa_e58764_Figure_5_figure_supplement_1.tif
- elife_poa_e58764_Figure_5_figure_supplement_2.tif
- elife_poa_e58764_Figure_5_figure_supplement_2_source_data_1.xlsx
- elife_poa_e58764_Figure_5_figure_supplement_3.tif
- elife_poa_e58764_Figure_5_figure_supplement_3_source_data_1.xlsx
- elife_poa_e58764_Transparent_Reporting_File.pdf
