# Supplementary material for: Cold-induced hyperphagia requires AgRP neuron activation in mice
Source: eLife journal article supplement (doi:10.7554/elife.58764), 2020-12-15
Supplement: supp [file elife-58764-supp-v1.zip › elife_poa_e58764_Figure_1_source_data_1.xlsx]

## Sheet: Figure 1
B-Core temperature					C-Heat production (Ave kcal/hr)					D-Energy intake (Ave kcal/day)					E-delta Body weight (g)			F-delta body fat (g)			G-delta lean mass (g)
22C		14C			22C		14C			22C		14C			22C	14C		22C	14C		22C	14C
Dark	Light	Dark	Light		Dark	Light	Dark	Light		Dark	Light	Dark	Light		0.88	-0.09		-0.02	0.05		0.54	-0.83
36.53	35.48	36.25	35.29		0.483	0.39	0.567	0.506		14.12	3.07	22.19	3.47		-0.29	0.33		0.22	-0.03		-0.43	-0.34
37.49	35.72	37.36	35.6		0.464	0.36	0.551	0.486		17.93	0.87	18.68	3.81		-0.51	-0.39		0.19	-0.32		-0.28	-0.53
36.86	36.7	36.86	36.66		0.43	0.362	0.557	0.477		18.81	3.55	21.39	4.76		-0.19	0.17		0	-0.18		-0.16	0.17
36.72	35.74	36.19	35.27		0.427	0.327	0.508	0.454		14.85	2.12	15.55	4.18		0.26	-0.03		0.14	0.1		0.14	0.17
36.36	35.7	36.62	35.42		0.501	0.381	0.612	0.515		hopper fail	1.58	15.98	2.44		-0.06	0.55		0.22	0.04		0.19	0.1
36.68	35.51	36.69	35.52		0.482	0.384	0.595	0.513		12.37	3.02	17.15	4.59		-0.52	0.13		0.2	-0.04		-0.16	0.09
36.81	35.62	36.14	35.24		0.54	0.417	0.631	0.522		11.2	2.57	16.36	2.56		0.24	0.22		0.19	0.1		0.74	-0.18
					0.573	0.421	0.685	0.594		11.33	3.27	26	4.69
Figure 1H:	Agrp			Npy			Pomc			Pmch
	22C	14C		22C	14C		22C	14C		22C	14C
	1.06	2.32		1.13	1.39		1.19	1.03		1.01	0.88
	0.72	1.67		0.8	1.04		0.78	0.85		1.15	0.85
	0.85	1.94		0.8	1.58		1.15	0.88		0.8	1.13
	1.26	2.01		1.34	1.34		1.43	1.13		1.19
	0.99	2.35		1.15	1.47		1.08	1.23		0.9	1
	1.13	2.56		0.78	2.12		1.43	1.6		0.95	1.15
