# Supplementary material for: Cold-induced hyperphagia requires AgRP neuron activation in mice
Source: eLife journal article supplement (doi:10.7554/elife.58764), 2020-12-15
Supplement: supp [file elife-58764-supp-v1.zip › elife_poa_e58764_Figure_2_source_data_1.xlsx]

## Sheet: Figure 2B and C 4 and 24hr Heat
14oC																		22oC
0.73626	0.599792	0.626798	0.576881	0.443514	0.456581	0.62974	0.729993	0.536539	0.527582	0.652382	0.34996	0.411506	0.640921	0.524703	0.526038			0.6969	0.391672	0.447796	0.388972	0.335104	0.332842	0.483196	0.548333	0.411777	0.341102	0.384305	0.371697	0.336119	0.458857	0.445712	0.503673
0.786897	0.620412	0.648915	0.598703	0.612416	0.482166	0.746498	0.695949	0.545787	0.394193	0.658142	0.356969	0.432449	0.665022	0.593588	0.580715			0.588962	0.465522	0.402911	0.355188	0.352228	0.349136	0.515998	0.482564	0.470285	0.287634	0.460452	0.356757	0.420501	0.522134	0.512578	0.484129
0.592524	0.607787	0.586614	0.535951	0.434422	0.480357	0.627742	0.578908	0.659919	0.345643	0.622614	0.33282	0.408308	0.659023	0.701193	0.560036			0.50808	0.367789	0.481031	0.371225	0.342764	0.326051	0.473673	0.585538	0.457276	0.239439	0.412862	0.348215	0.39189	0.549311	0.490746	0.520069
0.494753	0.563853	0.51117	0.474187	0.495571	0.503848	0.69222	0.605544	0.569219	0.294142	0.485391	0.340585	0.311702	0.556963	0.62538	0.550982			0.342537	0.318376	0.377056	0.428814	0.344116	0.248637	0.394412	0.513822	0.455275	0.185468	0.443045	0.384375	0.3682	0.547827	0.477231	0.349657
0.497411	0.496734	0.655637	0.49877	0.51233	0.461931	0.704399	0.607744	0.557329	0.276884	0.419216	0.286463	0.325353	0.55805	0.607875	0.512533			0.387664	0.330247	0.3533	0.375778	0.294328	0.240228	0.360065	0.525457	0.548057	0.160011	0.414469	0.328722	0.343617	0.510883	0.387645	0.343879
0.489086	0.623633	0.424709	0.448732	0.363259	0.397135	0.642681	0.544461	0.528669	0.333182	0.454649	0.243526	0.344258	0.647643	0.51294	0.495362			0.355037	0.375355	0.407979	0.261755	0.229461	0.273509	0.36791	0.468692	0.473856	0.227819	0.355083	0.250772	0.330216	0.474836	0.387027	0.338399
0.480364	0.397709	0.479211	0.396359	0.436671	0.3254	0.584877	0.54546	0.467406	0.360283	0.459583	0.298471	0.333983	0.539303	0.484305	0.485211			0.408183	0.345026	0.366677	0.305733	0.318582	0.253242	0.373733	0.394565	0.401174	0.202304	0.325168	0.23934	0.292816	0.450715	0.352838	0.33401
0.682453	0.448993	0.51925	0.394343	0.369892	0.500447	0.535133	0.502336	0.464378	0.305742	0.487221	0.301497	0.328985	0.563205	0.463631	0.515728			0.387062	0.375927	0.407863	0.320501	0.257829	0.236995	0.375496	0.434044	0.352716	0.213448	0.401807	0.233211	0.266755	0.400634	0.341313	0.38768
0.47492	0.431046	0.488013	0.393775	0.321022	0.379663	0.486394	0.58661	0.413698	0.288346	0.482767	0.315632	0.350625	0.432141	0.523617	0.476118			0.386951	0.365718	0.371689	0.304048	0.271468	0.327919	0.371099	0.484359	0.330878	0.222662	0.312678	0.299386	0.286882	0.354269	0.330146	0.316484
0.458548	0.470926	0.515815	0.405835	0.332379	0.355175	0.636923	0.498524	0.440462	0.385696	0.409739	0.319537	0.394393	0.467179	0.534257	0.501485			0.321655	0.389859	0.38304	0.345887	0.278495	0.265983	0.380688	0.549375	0.349079	0.211918	0.312617	0.301823	0.291257	0.364578	0.366614	0.400945
0.469403	0.559911	0.519943	0.438759	0.388118	0.441281	0.574939	0.528924	0.450174	0.319339	0.48072	0.377699	0.334172	0.455797	0.6291	0.482063			0.519833	0.422038	0.385266	0.267777	0.267819	0.289351	0.337491	0.55416	0.340008	0.163089	0.32475	0.274419	0.279933	0.338606	0.336084	0.423629
0.441302	0.769306	0.466533	0.443819	0.351745	0.399478	0.482533	0.561613	0.455979	0.293051	0.416714	0.24704	0.343666	0.463841	0.480584	0.445551			0.373555	0.322179	0.367107	0.278501	0.282946	0.310734	0.355108	0.566727	0.326294	0.163098	0.34537	0.258621	0.339269	0.350758	0.355138	0.338844
0.544156	0.57329	0.512934	0.433999	0.330431	0.37221	0.503694	0.587656	0.459159	0.283588	0.664473	0.390018	0.315348	0.494715	0.431897	0.66486			0.325015	0.490467	0.356695	0.293922	0.250388	0.271957	0.370207	0.442936	0.336362	0.140121	0.345882	0.269819	0.282508	0.36293	0.368073	0.329744
0.474914	0.57107	0.464833	0.427358	0.329544	0.370309	0.551003	0.579293	0.440247	0.306511	0.511302	0.393649	0.317969	0.479449	0.508216	0.625265			0.343717	0.439959	0.389047	0.323743	0.271013	0.47358	0.39135	0.354477	0.338783	0.176259	0.332707	0.253214	0.26759	0.355987	0.371142	0.342544
0.598697	0.468932	0.536495	0.427816	0.323238	0.386074	0.66942	0.505268	0.520114	0.277046	0.421825	0.349523	0.318449	0.470264	0.473944	0.474698			0.433329	0.440421	0.34738	0.33187	0.245596	0.429011	0.436395	0.348353	0.336841	0.192143	0.326423	0.247348	0.331955	0.375365	0.559795	0.349317
0.441923	0.37053	0.494161	0.491049	0.3167	0.363244	0.448301	0.547819	0.629628	0.275606	0.485678	0.262566	0.338058	0.585303	0.512751	0.443591			0.361513	0.341531	0.369157	0.292928	0.258837	0.412044	0.332124	0.381293	0.331986	0.146499	0.311412	0.228756	0.30387	0.351267	0.615494	0.318672
0.411672	0.409601	0.559252	0.50525	0.319042	0.355791	0.661461	0.632475	0.641194	0.304032	0.47512	0.271292	0.341871	0.485391	0.491876	0.452267			0.352507	0.353076	0.362375	0.276819	0.243319	0.478661	0.290831	0.387774	0.299551	0.138638	0.468704	0.320949	0.228779	0.365271	0.438788	0.32606
0.449441	0.412475	0.416383	0.495326	0.323205	0.363878	0.429203	0.452236	0.57458	0.247975	0.396925	0.266038	0.31234	0.398911	0.467546	0.445309			0.350693	0.454622	0.433038	0.316155	0.258502	0.317661	0.317682	0.371697	0.31699	0.179814	0.536089	0.249449	0.332769	0.335603	0.315595	0.332711
0.419429	0.398799	0.585684	0.520683	0.337994	0.378451	0.422511	0.603704	0.474976	0.330806	0.511534	0.345105	0.449706	0.463797	0.518782	0.453623			0.380464	0.38677	0.396798	0.438023	0.240798	0.392768	0.331333	0.380159	0.321088	0.149099	0.462998	0.361279	0.245796	0.536713	0.364278	0.336832
0.563703	0.394184	0.492972	0.372095	0.320387	0.365712	0.480962	0.664082	0.446142	0.412062	0.470334	0.421123	0.540788	0.650865	0.501567	0.466983			0.516993	0.277832	0.317099	0.401294	0.327786	0.264909	0.36909	0.365165	0.35188	0.143743	0.414529	0.365721	0.251609	0.541587	0.332837	0.310064
0.501992	0.357541	0.431906	0.375018	0.356801	0.459495	0.470213	0.553786	0.422721	0.412292	0.464279	0.423635	0.643875	0.488667	0.514653	0.490723			0.327241	0.609631	0.344624	0.250313	0.496333	0.258197	0.342794	0.386851	0.301434	0.148074	0.314085	0.265622	0.262921	0.418092	0.355129	0.631104
0.554439	0.396266	0.435298	0.39558	0.360176	0.360708	0.512633	0.476149	0.462319	0.23203	0.446225	0.353112	0.517505	0.400363	0.679374	0.656928			0.357937	0.330393	0.348576	0.25231	0.254936	0.247892	0.377391	0.45257	0.340771	0.145736	0.339265	0.302241	0.222893	0.316546	0.364071	0.43208
0.478101	0.61101	0.446072	0.410429	0.403602	0.332315	0.491594	0.529703	0.42719	0.27382	0.411628	0.279782	0.315949	0.505228	0.662823	0.474843			0.378919	0.294697	0.360255	0.378207	0.230898	0.241522	0.311861	0.411428	0.318183	0.147011	0.320502	0.465174	0.281324	0.329988	0.359754	0.303165
0.456874	0.379109	0.427056	0.452452	0.480645	0.396393	0.421721	0.473408	0.397775	0.273159	0.7211	0.248199	0.339212	0.472412	0.510063	0.438474			0.376916	0.465918	0.387513	0.376107	0.22575	0.263823	0.358336	0.433748	0.312951	0.160344	0.358936	0.361768	0.262932	0.305679	0.412096	0.364989
0.429108	0.408912	0.473298	0.487344	0.439278	0.450733	0.462809	0.498584	0.404831	0.281537	0.550305	0.301674	0.294804	0.480122	0.52628	0.447947			0.340572	0.346304	0.355975	0.263855	0.257427	0.276971	0.343558	0.332694	0.33402	0.146618	0.308541	0.215775	0.270665	0.330256	0.343334	0.309268
0.469234	0.39978	0.442894	0.417042	0.581175	0.419965	0.413247	0.543628	0.416866	0.307674	0.611231	0.382339	0.295347	0.579966	0.530846	0.455072			0.339225	0.339016	0.372402	0.265335	0.292215	0.288298	0.331587	0.375495	0.331263	0.261163	0.318083	0.189288	0.366819	0.344971	0.332029	0.365439
0.523776	0.424418	0.573123	0.438847	0.509501	0.597181	0.45116	0.561558	0.471815	0.318386	0.456743	0.366193	0.358434	0.596795	0.468124	0.444909			0.551789	0.435581	0.369293	0.28791	0.263437	0.270842	0.329238	0.357207	0.322117	0.316586	0.327447	0.229687	0.488379	0.376481	0.578592	0.36717
0.538712	0.389878	0.483161	0.427489	0.372504	0.500646	0.444626	0.496619	0.404104	0.30856	0.431558	0.271353	0.286996	0.534243	0.490319	0.499584			0.318993	0.386482	0.362179	0.282576	0.269697	0.266713	0.32811	0.343655	0.311446	0.183284	0.323974	0.237013	0.422888	0.354669	0.575875	0.31598
0.47273	0.406278	0.527853	0.388408	0.420123	0.446458	0.519988	0.50262	0.550126	0.29158	0.408455	0.529432	0.318277	0.374031	0.46516	0.449017			0.314857	0.438804	0.353342	0.297077	0.268983	0.271858	0.3089	0.359095	0.314034	0.156773	0.330505	0.269253	0.352703	0.373368	0.339587	0.329673
0.403684	0.391467	0.396982	0.418305	0.434448	0.476264	0.517869	0.760896	0.59432	0.361838	0.46206	0.355768	0.301365	0.438924	0.509509	0.622501			0.351106	0.302463	0.345309	0.275225	0.30032	0.287676	0.334413	0.341742	0.371171	0.13428	0.316497	0.238406	0.202314	0.353285	0.359878	0.332877
0.374598	0.407823	0.494085	0.509386	0.437251	0.421642	0.438679	0.785933	0.585777	0.59855	0.547467	0.287942	0.316305	0.469671	0.392113	0.575211			0.370669	0.289924	0.515212	0.258096	0.313347	0.243229	0.331698	0.378298	0.401659	0.15817	0.318161	0.26531	0.273404	0.334809	0.401003	0.331451
0.447367	0.404967	0.459777	0.432908	0.48254	0.464621	0.465256	0.626714	0.431743	0.441897	0.44413	0.323725	0.423208	0.475535	0.473533	0.776212			0.333878	0.313682	0.472445	0.283471	0.278053	0.273185	0.347887	0.353549	0.404287	0.155519	0.337274	0.249543	0.239009	0.323964	0.349557	0.344628
0.424051	0.587601	0.491464	0.441903	0.365749	0.352085	0.445205	0.604182	0.431268	0.319616	0.415365	0.365276	0.337578	0.448545	0.474883	0.592066			0.343014	0.359177	0.498461	0.285287	0.289843	0.345107	0.327016	0.381667	0.559859	0.138597	0.34907	0.235407	0.266522	0.385342	0.32169	0.235853
0.544011	0.493983	0.467494	0.445168	0.309425	0.327406	0.481658	0.468632	0.422844	0.250548	0.418463	0.44854	0.339038	0.463685	0.608576	0.639767			0.342017	0.403688	0.317142	0.287474	0.220979	0.252591	0.304792	0.386312	0.498373	0.141532	0.310454	0.250221	0.259016	0.359374	0.323677	0.297486
0.652623	0.340425	0.440871	0.447092	0.347002	0.383595	0.778779	0.584463	0.439506	0.2402	0.465398	0.418111	0.334344	0.412062	0.553951	0.516119			0.339657	0.286929	0.309315	0.296255	0.283371	0.260166	0.326741	0.370442	0.489613	0.147491	0.361737	0.239855	0.290929	0.311679	0.364922	0.339517
0.788123	0.386001	0.450198	0.441916	0.350225	0.359926	0.88886	0.587113	0.49986	0.27733	0.372527	0.377827	0.336216	0.437178	0.389118	0.44986			0.322424	0.343237	0.313711	0.402394	0.250735	0.284197	0.33934	0.369798	0.465713	0.152136	0.348041	0.244998	0.314405	0.358924	0.407057	0.313953
0.573617	0.390703	0.449116	0.442451	0.319697	0.416241	0.574216	0.604427	0.451754	0.281636	0.52794	0.389544	0.336332	0.454944	0.474144	0.504199			0.38476	0.335562	0.318942	0.404793	0.247269	0.393087	0.302019	0.373269	0.437668	0.13625	0.30039	0.251086	0.31107	0.382635	0.301978	0.327972
0.540331	0.373698	0.514731	0.397923	0.33232	0.396068	0.430344	0.480177	0.451861	0.283567	0.481429	0.321029	0.358493	0.420013	0.445828	0.452809			0.326282	0.348517	0.30723	0.399584	0.247118	0.487249	0.599941	0.472795	0.430418	0.138441	0.310741	0.245709	0.267468	0.327851	0.328042	0.352124
0.466067	0.456568	0.448259	0.636043	0.331879	0.340553	0.508491	0.491721	0.414248	0.264335	0.478562	0.306597	0.321725	0.502482	0.512411	0.3967			0.302801	0.346446	0.373578	0.355783	0.256116	0.343585	0.582089	0.506731	0.288042	0.192207	0.323561	0.253776	0.287373	0.51466	0.333668	0.331175
0.452728	0.500827	0.55135	0.528384	0.306826	0.375495	0.409502	0.414156	0.477872	0.271494	0.443613	0.37315	0.536218	0.45925	0.806335	0.383332			0.291468	0.362077	0.339568	0.390863	0.243137	0.366886	0.411272	0.601818	0.307672	0.26248	0.310925	0.304458	0.250193	0.604725	0.345196	0.531303
0.481131	0.45287	0.754635	0.396861	0.33404	0.459792	0.463317	0.504072	0.430816	0.277099	0.52379	0.361468	0.504939	0.642383	0.646229	0.484709			0.680564	0.376107	0.342783	0.347149	0.237262	0.364347	0.408434	0.537901	0.31307	0.179136	0.433202	0.244843	0.312459	0.465156	0.544265	0.504868
0.461507	0.57769	0.630157	0.393017	0.344301	0.486604	0.445977	0.566958	0.399913	0.273749	0.580723	0.257115	0.449809	0.593179	0.482284	0.472307			0.552623	0.360397	0.342835	0.263797	0.251927	0.343507	0.34472	0.591076	0.300538	0.126718	0.408435	0.201247	0.245227	0.419118	0.462331	0.432225
0.428962	0.688641	0.591697	0.417453	0.327132	0.355638	0.427294	0.509791	0.391616	0.27785	0.717996	0.370455	0.347642	0.379312	0.515552	0.436991			0.444401	0.330005	0.317055	0.299303	0.235311	0.354877	0.327247	0.397102	0.33387	0.15891	0.562786	0.304837	0.242982	0.359595	0.456746	0.479302
0.424298	0.510318	0.443119	0.406682	0.333354	0.483487	0.464287	0.510028	0.423574	0.277645	0.775082	0.31248	0.270203	0.412473	0.428965	0.456965			0.386767	0.304141	0.405939	0.265563	0.246667	0.320928	0.283195	0.345087	0.343442	0.13361	0.519649	0.405983	0.290004	0.325895	0.367691	0.374231
0.518627	0.443431	0.478417	0.406183	0.322765	0.366982	0.383577	0.669373	0.454873	0.359236	0.513054	0.419045	0.344699	0.361984	0.515819	0.495298			0.271848	0.321767	0.423081	0.306474	0.241339	0.404115	0.347337	0.303012	0.324282	0.141635	0.385925	0.31875	0.215378	0.37654	0.301839	0.31052
0.473723	0.39897	0.467354	0.403238	0.328431	0.327773	0.419719	0.536726	0.430956	0.337007	0.354147	0.305269	0.305747	0.420619	0.461855	0.486995			0.331421	0.412558	0.351401	0.285685	0.225213	0.310618	0.344481	0.410099	0.315016	0.151712	0.440362	0.396216	0.23106	0.355276	0.277398	0.296809
0.441406	0.374125	0.476625	0.449114	0.29979	0.372788	0.435134	0.528858	0.424828	0.314753	0.500265	0.321639	0.325093	0.407167	0.476858	0.44176			0.411472	0.491874	0.340277	0.343245	0.220966	0.293815	0.347501	0.42625	0.305777	0.151429	0.42516	0.442526	0.240584	0.313737	0.350072	0.304081
0.493506	0.420958	0.529637	0.43671	0.311855	0.411612	0.445216	0.473951	0.377179	0.356141	0.39405	0.301419	0.429762	0.438791	0.403313	0.394094			0.357931	0.402823	0.432048	0.27914	0.42347	0.292043	0.312778	0.390509	0.275915	0.149002	0.386086	0.328517	0.246351	0.322079	0.32557	0.303397
0.382422	0.391347	0.399121	0.416326	0.255751	0.357724	0.442639	0.386156	0.426908	0.527668	0.461693	0.308568	0.490468	0.431252	0.629534	0.411384			0.325643	0.295535	0.403952	0.248156	0.321037	0.20818	0.326782	0.321497	0.296456	0.133278	0.293449	0.230509	0.249703	0.40814	0.319939	0.313417
0.527555	0.405847	0.418383	0.429951	0.292297	0.38341	0.392268	0.420098	0.416979	0.432881	0.449096	0.286576	0.389545	0.512783	0.639612	0.387638			0.381615	0.344643	0.395971	0.309808	0.305332	0.252737	0.326095	0.331819	0.334803	0.140231	0.345017	0.206673	0.239778	0.382852	0.326488	0.301855
0.459554	0.479085	0.492648	0.464959	0.252106	0.370462	0.430196	0.424951	0.458392	0.45705	0.475899	0.218024	0.495961	0.507506	0.482016	0.407709			0.377054	0.421843	0.326044	0.314744	0.350895	0.273969	0.321122	0.351044	0.343775	0.144945	0.30918	0.262595	0.261676	0.339366	0.364902	0.289713
0.327507	0.386611	0.455083	0.345881	0.35911	0.332011	0.409664	0.454761	0.417799	0.351401	0.550659	0.270836	0.476659	0.356162	0.461579	0.731518			0.32963	0.594405	0.318047	0.285836	0.36423	0.278924	0.367934	0.377314	0.311853	0.136547	0.342657	0.264847	0.235311	0.428052	0.357737	0.338367
0.426239	0.416528	0.556368	0.370433	0.359734	0.373554	0.44752	0.523155	0.468645	0.306298	0.34908	0.308541	0.548016	0.569215	0.451567	0.717709			0.356999	0.508379	0.34058	0.290598	0.368602	0.292748	0.315322	0.389373	0.319547	0.15407	0.300849	0.25405	0.376206	0.368341	0.308862	0.369581
0.541586	0.366709	0.443518	0.44436	0.352847	0.494862	0.493861	0.575555	0.609388	0.297147	0.417217	0.410909	0.424959	0.487746	0.487839	0.642882			0.329079	0.404832	0.351848	0.258062	0.305856	0.267425	0.309714	0.354919	0.300901	0.142048	0.355388	0.278108	0.335012	0.337554	0.326126	0.345713
0.413901	0.37802	0.513297	0.345832	0.304629	0.491157	0.492025	0.504622	0.688349	0.263699	0.528793	0.421576	0.355899	0.408185	0.525453	0.508704			0.338007	0.285046	0.383173	0.321493	0.270221	0.267071	0.314896	0.345143	0.322532	0.139123	0.360032	0.257323	0.396553	0.330649	0.293191	0.258966
0.559557	0.400873	0.478753	0.39851	0.38297	0.599222	0.554475	0.404551	0.458089	0.314661	0.529743	0.373877	0.352278	0.530837	0.814182	0.442068			0.358528	0.299163	0.33966	0.254162	0.303625	0.272657	0.305379	0.356991	0.315676	0.169661	0.307248	0.244596	0.415487	0.328816	0.366423	0.296071
0.400724	0.384161	0.3951	0.348315	0.3803	0.482039	0.523718	0.517146	0.371504	0.323808	0.326182	0.26551	0.332613	0.65131	0.610611	0.664732			0.334315	0.352866	0.35956	0.296526	0.243826	0.288953	0.461134	0.343217	0.305965	0.147508	0.294525	0.262852	0.415671	0.359413	0.344298	0.300142
0.456952	0.419045	0.434505	0.400289	0.379487	0.488814	0.488919	0.602786	0.409306	0.283395	0.396562	0.359932	0.335344	0.716116	0.795044	0.45443			0.331879	0.336931	0.459935	0.29893	0.204598	0.348147	0.495378	0.351052	0.317395	0.141536	0.37845	0.284365	0.235861	0.357037	0.417114	0.312452
0.443705	0.622436	0.438611	0.379987	0.279543	0.536442	0.409461	0.702535	0.388914	0.29527	0.464084	0.27369	0.335667	0.644884	0.65117	0.415184			0.416941	0.328711	0.457761	0.379588	0.235463	0.498968	0.41626	0.345031	0.287907	0.160562	0.320739	0.245624	0.215593	0.339785	0.419487	0.316687
0.370593	0.607209	0.433777	0.475052	0.26615	0.34996	0.440516	0.787998	0.457809	0.260932	0.447891	0.289672	0.309015	0.583387	0.73931	0.472737			0.620691	0.31118	0.528388	0.28822	0.250323	0.40917	0.438806	0.353151	0.302227	0.157123	0.328136	0.241775	0.306597	0.461385	0.578148	0.337108
0.397913	0.460969	0.485794	0.528415	0.302943	0.29778	0.469476	0.570313	0.443494	0.313841	0.4896	0.296185	0.33992	0.574268	0.551551	0.471793			0.524827	0.266936	0.430461	0.29895	0.239493	0.352334	0.55006	0.333396	0.296034	0.15002	0.336222	0.287039	0.294337	0.455737	0.553118	0.322925
0.450694	0.410652	0.443631	0.612542	0.488544	0.373053	0.458145	0.555791	0.396794	0.300571	0.382659	0.263686	0.352168	0.543231	0.445999	0.481063			0.435143	0.500185	0.384702	0.40985	0.220557	0.394708	0.41671	0.372723	0.280046	0.119707	0.250224	0.226164	0.283114	0.407088	0.408594	0.361262
0.556971	0.419124	0.523371	0.501944	0.410136	0.34761	0.438577	0.424595	0.44186	0.447768	0.450938	0.281015	0.332791	0.422812	0.434544	0.553219			0.42718	0.489723	0.299243	0.372608	0.288429	0.318248	0.439881	0.501536	0.312082	0.131461	0.316271	0.250387	0.277981	0.414831	0.395423	0.574625
0.676397	0.465662	0.454137	0.318219	0.612977	0.375777	0.398619	0.436648	0.413624	0.488994	0.436059	0.301893	0.490013	0.494707	0.464518	0.46739			0.290621	0.409775	0.317759	0.433938	0.307746	0.241605	0.311326	0.410062	0.311214	0.132742	0.492148	0.418571	0.253036	0.382335	0.415048	0.6871
0.875433	0.427645	0.467084	0.402494	0.544829	0.428729	0.409155	0.529709	0.464441	0.616432	0.527033	0.332578	0.341726	0.470278	0.485457	0.466674			0.324336	0.360642	0.382354	0.343877	0.249407	0.265177	0.33721	0.359375	0.289833	0.129084	0.401433	0.27173	0.301354	0.318611	0.310591	0.491617
0.703953	0.430616	0.400199	0.379001	0.468333	0.364225	0.433408	0.409685	0.39882	0.445999	0.454635	0.334524	0.283125	0.383138	0.454515	0.413446			0.376789	0.342116	0.36006	0.229371	0.208083	0.22354	0.331423	0.287254	0.303585	0.131711	0.401795	0.1982	0.274796	0.415293	0.330307	0.39798
0.674432	0.4381	0.416178	0.409031	0.369576	0.411376	0.55073	0.463985	0.379781	0.331724	0.435175	0.324831	0.374848	0.472264	0.465799	0.535264			0.344747	0.490596	0.374157	0.242697	0.257178	0.272747	0.353238	0.310104	0.281939	0.133633	0.377685	0.196037	0.233564	0.381294	0.364676	0.412904
0.569311	0.440311	0.412113	0.400625	0.380537	0.384337	0.539267	0.490217	0.415282	0.331677	0.542233	0.308603	0.385784	0.536345	0.459562	0.459346			0.360274	0.304298	0.331006	0.247452	0.238047	0.275591	0.338789	0.34344	0.314613	0.157695	0.291998	0.303918	0.315364	0.299368	0.313679	0.374945
0.494015	0.360536	0.431092	0.417098	0.42885	0.470169	0.545897	0.501081	0.385754	0.269797	0.723033	0.314792	0.358893	0.451468	0.422073	0.454549			0.344939	0.317323	0.383754	0.288367	0.250497	0.378731	0.37688	0.540124	0.287714	0.157456	0.311522	0.275523	0.287853	0.350204	0.314172	0.391114
0.462806	0.379282	0.501947	0.413184	0.275857	0.429864	0.462511	0.521891	0.407004	0.276319	0.650969	0.341732	0.337736	0.478283	0.480961	0.64112			0.390329	0.305752	0.392702	0.266066	0.230835	0.295674	0.356902	0.367787	0.293693	0.348332	0.314737	0.28777	0.314225	0.310114	0.325082	0.278815
0.435594	0.395134	0.502082	0.38613	0.275963	0.39561	0.432446	0.502507	0.417617	0.258493	0.61988	0.270234	0.321098	0.44285	0.621319	0.763828			0.348997	0.475104	0.402732	0.426737	0.210764	0.247259	0.267254	0.352952	0.359892	0.294735	0.35564	0.320391	0.301671	0.39121	0.306712	0.297304
0.440031	0.457098	0.689856	0.365948	0.328803	0.351989	0.464853	0.470102	0.62011	0.326944	0.592396	0.264291	0.336596	0.451774	0.640793	0.62949			0.375687	0.299592	0.306196	0.239592	0.235977	0.303295	0.487014	0.358714	0.420781	0.209361	0.340709	0.40855	0.262402	0.352558	0.313642	0.315711
0.573359	0.408934	0.500976	0.383016	0.337623	0.395794	0.458164	0.757781	0.627256	0.304258	0.483359	0.247787	0.479323	0.548528	0.65272	0.563774			0.344873	0.32833	0.318407	0.264691	0.218065	0.262483	0.460546	0.39456	0.479946	0.205329	0.319513	0.426209	0.22964	0.362476	0.292266	0.280915
0.457682	0.420516	0.545697	0.372777	0.339602	0.492744	0.442961	0.716335	0.580645	0.237542	0.365286	0.262279	0.550949	0.373303	0.438827	0.406021			0.34619	0.352803	0.339298	0.268216	0.229922	0.250405	0.384601	0.385479	0.499557	0.418532	0.316643	0.324729	0.243415	0.405997	0.277129	0.312636
0.391935	0.643644	0.488547	0.354703	0.392945	0.508219	0.479007	0.749231	0.704522	0.277003	0.386693	0.323337	0.496829	0.53356	0.461591	0.493423			0.3338	0.3304	0.310443	0.290452	0.218022	0.296024	0.380807	0.431222	0.378219	0.31137	0.290245	0.210578	0.300707	0.319604	0.287309	0.294439
0.477725	0.520436	0.452848	0.583011	0.263958	0.493308	0.431156	0.566855	0.605561	0.27741	0.401533	0.278095	0.427222	0.387879	0.428683	0.453127			0.342031	0.336611	0.335047	0.282547	0.243741	0.228443	0.310168	0.417181	0.38085	0.23736	0.327248	0.19875	0.380662	0.295662	0.298231	0.357727
0.518188	0.586671	0.447625	0.496599	0.338401	0.591379	0.398594	0.450366	0.573543	0.264267	0.385861	0.290621	0.310612	0.619573	0.473319	0.417352			0.368862	0.30442	0.389102	0.287973	0.238218	0.266386	0.288782	0.324102	0.305309	0.186972	0.290777	0.288464	0.337362	0.360897	0.386965	0.24888
0.432781	0.622391	0.507662	0.401977	0.369336	0.482196	0.430463	0.525578	0.528953	0.348311	0.398144	0.292092	0.297231	0.632604	0.440131	0.461809			0.367796	0.338815	0.295298	0.317372	0.308925	0.251769	0.337927	0.35609	0.30159	0.177572	0.320616	0.29666	0.415735	0.3486	0.317241	0.348293
0.528399	0.590642	0.441014	0.318678	0.320838	0.461872	0.449887	0.576342	0.451285	0.411977	0.494212	0.302536	0.334033	0.608966	0.446371	0.441995			0.345049	0.354292	0.349928	0.251211	0.39465	0.359027	0.339636	0.333287	0.291961	0.241248	0.310596	0.240312	0.436273	0.291974	0.394132	0.330401
0.454624	0.647801	0.459456	0.309549	0.331986	0.48325	0.65819	0.456525	0.397097	0.324965	0.4125	0.217819	0.353462	0.5443	0.555769	0.46153			0.310319	0.342536	0.338271	0.335406	0.238866	0.41052	0.325601	0.421125	0.330416	0.182226	0.315906	0.22085	0.30041	0.443212	0.312456	0.399884
0.457181	0.395636	0.470935	0.456778	0.292413	0.314119	0.706392	0.567154	0.45263	0.360383	0.448647	0.28506	0.309036	0.458603	0.551777	0.594928			0.361418	0.345425	0.424371	0.34072	0.223301	0.495571	0.321611	0.400773	0.322534	0.196422	0.300988	0.274006	0.217128	0.479359	0.320875	0.523351
0.390467	0.502513	0.451616	0.451929	0.323353	0.354806	0.785657	0.453506	0.371703	0.359229	0.489154	0.335564	0.326423	0.434984	0.447734	0.665401			0.336343	0.419506	0.318226	0.251331	0.261018	0.429426	0.256464	0.332797	0.308258	0.173307	0.323847	0.248129	0.242443	0.378167	0.334073	0.392166
0.434928	0.356076	0.419075	0.32387	0.343695	0.368589	0.685975	0.49757	0.434206	0.303692	0.413497	0.262059	0.36605	0.388835	0.453424	0.437543			0.304938	0.41886	0.4555	0.256825	0.195435	0.315865	0.368074	0.306783	0.330912	0.20788	0.333124	0.235236	0.349049	0.352336	0.293435	0.39225
0.571777	0.370158	0.507248	0.374555	0.307152	0.387088	0.625027	0.601029	0.441542	0.37141	0.545316	0.251607	0.536497	0.390922	0.550261	0.433603			0.469977	0.409449	0.39674	0.259736	0.231912	0.35421	0.349017	0.338635	0.298959	0.183674	0.320601	0.239931	0.253165	0.333862	0.319103	0.29169
0.619195	0.340863	0.404457	0.383383	0.281765	0.342496	0.566342	0.625677	0.442628	0.23671	0.607369	0.408802	0.418656	0.410334	0.709829	0.461212			0.506725	0.311587	0.461275	0.303249	0.261093	0.350358	0.373346	0.454022	0.395061	0.199931	0.262778	0.24302	0.245563	0.373332	0.555645	0.316456
0.741888	0.362815	0.510349	0.398863	0.365223	0.464073	0.44234	0.661873	0.446393	0.506329	0.558339	0.269366	0.343134	0.456257	0.817042	0.441756			0.510341	0.338783	0.557721	0.280021	0.273424	0.37444	0.299833	0.263153	0.311738	0.256152	0.326441	0.261969	0.243769	0.327049	0.450048	0.368607
0.642704	0.416362	0.407556	0.349101	0.36444	0.477411	0.440928	0.685075	0.39325	0.558708	0.386544	0.327425	0.258342	0.42847	0.708521	0.457918			0.540815	0.585677	0.540868	0.387431	0.215446	0.234275	0.325192	0.48156	0.289172	0.200277	0.281194	0.269446	0.255828	0.326965	0.492862	0.317357
0.415693	0.374321	0.561218	0.341584	0.445997	0.515778	0.432422	0.600977	0.455567	0.486965	0.4414	0.250645	0.297768	0.531561	0.533054	0.679381			0.584263	0.447457	0.449521	0.488744	0.260826	0.249385	0.313067	0.467749	0.317418	0.186392	0.381462	0.246848	0.27488	0.329833	0.556287	0.413433
0.454104	0.396454	0.638205	0.408427	0.423718	0.316629	0.405892	0.523324	0.465996	0.354623	0.454577	0.480185	0.309077	0.467055	0.43573	0.504934			0.575682	0.36822	0.424538	0.414711	0.236095	0.23447	0.337917	0.507064	0.30884	0.166399	0.663624	0.248287	0.295666	0.341036	0.343259	0.404996
0.463697	0.416245	0.591197	0.426201	0.399885	0.43518	0.466501	0.508133	0.464703	0.353682	0.45013	0.293941	0.323437	0.493114	0.450921	0.39738			0.481029	0.283421	0.530258	0.556778	0.388587	0.237624	0.467187	0.564278	0.295051	0.184875	0.430092	0.252634	0.249308	0.352837	0.266988	0.321718
0.404599	0.437666	0.659582	0.519141	0.456851	0.469514	0.449395	0.530322	0.445504	0.308617	0.478497	0.231335	0.342577	0.482892	0.572168	0.50395			0.377441	0.303843	0.388064	0.358367	0.459244	0.258909	0.622588	0.517554	0.332038	0.16427	0.371637	0.232082	0.375143	0.347573	0.305179	0.305694
0.420399	0.421925	0.536709	0.584533	0.499417	0.511853	0.438782	0.449638	0.451804	0.330223	0.415167	0.377398	0.424085	0.627317	0.517163	0.472286			0.284708	0.304589	0.336495	0.323278	0.315954	0.241806	0.638775	0.433292	0.308685	0.233843	0.341854	0.309073	0.301326	0.491178	0.343017	0.276789
0.444624	0.458313	0.424439	0.525408	0.454889	0.542254	0.445812	0.467353	0.637881	0.324623	0.512403	0.290729	0.340451	0.689449	0.479031	0.653597			0.331606	0.313315	0.316842	0.376256	0.381932	0.361014	0.467428	0.411833	0.303673	0.300659	0.397331	0.268452	0.328703	0.311248	0.349164	0.279278
0.499648	0.610573	0.455092	0.569272	0.366566	0.635279	0.46326	0.485354	0.66074	0.32929	0.484764	0.255084	0.306398	0.466006	0.526593	0.762683			0.321876	0.346611	0.433265	0.318375	0.427779	0.370391	0.442337	0.358099	0.295684	0.2288	0.458707	0.280326	0.339299	0.35294	0.322619	0.396185
0.547289	0.59628	0.468314	0.376568	0.302347	0.527535	0.517978	0.589084	0.600587	0.28277	0.374722	0.263027	0.43187	0.428414	0.548501	0.832652			0.31779	0.334279	0.338153	0.272156	0.275225	0.215319	0.40266	0.42204	0.303014	0.18154	0.362123	0.312404	0.4824	0.372609	0.37394	0.341148
0.478219	0.4482	0.464436	0.345663	0.305863	0.526064	0.680013	0.542009	0.459007	0.358206	0.581626	0.285402	0.544492	0.435532	0.289987	0.69809			0.320965	0.404205	0.304723	0.278231	0.291093	0.251225	0.28181	0.386659	0.428321	0.154068	0.283793	0.295212	0.490941	0.357053	0.330298	0.404038
0.461166	0.390577	0.398448	0.444261	0.359972	0.569624	0.747634	0.485013	0.446384	0.37609	0.654968	0.269376	0.647789	0.43219	0.599604	0.600592			0.36333	0.498593	0.403332	0.232962	0.375645	0.236591	0.297989	0.324372	0.412005	0.16598	0.310389	0.397225	0.347157	0.348981	0.323306	0.490961
0.447643	0.413982	0.44989	0.381047	0.355548	0.491834	0.730171	0.606735	0.40639	0.344853	0.497567	0.275224	0.404455	0.408981	0.505804	0.54513			0.330655	0.200706	0.357089	0.2966	0.298279	0.221635	0.333413	0.32209	0.481057	0.129355	0.321122	0.374979	0.261761	0.334319	0.44908	0.442563
0.414995	0.428058	0.388471	0.398108	0.316196	0.470204	0.610153	0.505503	0.475587	0.477334	0.395743	0.256194	0.312491	0.420566	0.431911	0.428369			0.33502	0.26928	0.337336	0.271367	0.290808	0.269032	0.322483	0.346877	0.446406	0.153941	0.319842	0.364724	0.266378	0.357507	0.453003	0.426235
0.45865	0.460726	0.420812	0.496825	0.299408	0.336172	0.578169	0.610301	0.407112	0.50818	0.362578	0.290645	0.29566	0.459978	0.404126	0.430681			0.377408	0.451153	0.341427	0.277454	0.226955	0.382266	0.340837	0.347932	0.463509	0.218704	0.336031	0.206337	0.363887	0.380036	0.494993	0.501167
0.566634	0.428048	0.401242	0.49538	0.348218	0.310621	0.507415	0.589658	0.477289	0.552926	0.420963	0.283876	0.302628	0.42861	0.424507	0.409699			0.311314	0.40701	0.394207	0.292415	0.226802	0.37351	0.284493	0.345098	0.446172	0.230634	0.320146	0.175345	0.228489	0.34744	0.453941	0.377768
0.870599	0.400065	0.43148	0.518951	0.301677	0.314883	0.604553	0.597989	0.418334	0.338458	0.485168	0.319576	0.31043	0.527386	0.448886	0.497969			0.303359	0.420438	0.309908	0.297848	0.22132	0.393285	0.325325	0.425963	0.380075	0.232839	0.321587	0.244645	0.227016	0.430687	0.410962	0.260061
0.58464	0.479927	0.441232	0.614408	0.287065	0.360724	0.574565	0.488987	0.375393	0.285227	0.440547	0.270687	0.329463	0.624629	0.496905	0.557638			0.363721	0.398002	0.401266	0.26336	0.242026	0.385979	0.335936	0.371318	0.385162	0.204062	0.309477	0.264323	0.230541	0.455824	0.318645	0.305663
0.550809	0.49386	0.559408	0.469976	0.474928	0.364486	0.487206	0.418606	0.410456	0.267384	0.411922	0.399942	0.327029	0.602016	0.519165	0.645657			0.330606	0.311673	0.437489	0.28128	0.254873	0.362513	0.34209	0.43887	0.30978	0.357538	0.306046	0.226687	0.260085	0.328672	0.322764	0.316752
0.419589	0.464579	0.598921	0.321263	0.407896	0.441962	0.432742	0.434688	0.372319	0.283245	0.451876	0.303326	0.315975	0.52206	0.526041	0.688847			0.332687	0.355027	0.295547	0.262611	0.293722	0.310533	0.340479	0.544307	0.274834	0.235894	0.337609	0.249727	0.274196	0.339877	0.323999	0.353745
0.447858	0.514667	0.60058	0.440035	0.517282	0.404392	0.454534	0.539583	0.40544	0.285969	0.413561	0.245739	0.583174	0.442472	0.529153	0.488509			0.338358	0.571557	0.362323	0.296369	0.24608	0.236913	0.425428	0.496463	0.28117	0.155507	0.285228	0.261977	0.3023	0.37627	0.312474	0.393943
0.570037	0.493236	0.571066	0.333351	0.706467	0.429981	0.460547	0.611935	0.408739	0.275955	0.614801	0.25606	0.617188	0.372229	0.519213	0.559573			0.293503	0.41921	0.501942	0.288396	0.239276	0.217181	0.6754	0.580135	0.293781	0.213816	0.285526	0.223242	0.298987	0.384021	0.316625	0.531378
0.567133	0.509706	0.647342	0.437808	0.627335	0.436983	0.470362	0.557897	0.473297	0.281657	0.683026	0.282238	0.503443	0.443521	0.727275	0.665724			0.451663	0.531798	0.49489	0.246717	0.259491	0.223844	0.76194	0.379312	0.305336	0.14396	0.497523	0.262505	0.321684	0.380529	0.350857	0.41333
0.537968	0.604646	0.478735	0.530217	0.605102	0.536418	0.482297	0.540152	0.454371	0.314363	0.626139	0.267423	0.342091	0.448061	0.703332	0.464759			0.549201	0.437283	0.533663	0.281107	0.253714	0.234672	0.479465	0.294453	0.331298	0.207666	0.452866	0.245678	0.332342	0.578202	0.325587	0.350999
0.623995	0.562639	0.406041	0.623163	0.478888	0.420729	0.480655	0.492366	0.445288	0.397536	0.550506	0.238028	0.335249	0.424116	0.596689	0.419593			0.536348	0.428331	0.414232	0.276238	0.24462	0.386821	0.487626	0.343577	0.31807	0.196313	0.426135	0.277875	0.283573	0.442732	0.385856	0.285768
0.524024	0.400511	0.531254	0.518582	0.365365	0.439133	0.457749	0.67538	0.746156	0.314913	0.420884	0.336218	0.357299	0.415059	0.38846	0.45262			0.5381	0.29584	0.381466	0.258181	0.226843	0.270363	0.568464	0.362858	0.32418	0.170423	0.331881	0.406064	0.392085	0.447764	0.438747	0.344562
0.464592	0.369031	0.473326	0.408143	0.50104	0.498002	0.44634	0.740345	0.660223	0.426524	0.427714	0.298968	0.347701	0.459934	0.414332	0.4853			0.495084	0.2629	0.33864	0.385492	0.214576	0.233181	0.500457	0.371534	0.30561	0.267421	0.269547	0.420473	0.360543	0.437482	0.549155	0.334355
0.501658	0.384246	0.441933	0.406082	0.517748	0.443621	0.607627	0.621367	0.603503	0.571606	0.458885	0.226904	0.333963	0.543109	0.694299	0.632707			0.311495	0.39246	0.370129	0.372302	0.241399	0.247641	0.43059	0.319126	0.28306	0.374482	0.335913	0.30334	0.348033	0.431127	0.451776	0.340272
0.730977	0.415199	0.568551	0.404029	0.596383	0.311206	0.699971	0.650326	0.707087	0.330453	0.456497	0.285161	0.351003	0.647478	0.571754	0.645887			0.310959	0.34887	0.265789	0.401752	0.267625	0.311017	0.358649	0.392336	0.310558	0.202711	0.319581	0.258856	0.450663	0.363258	0.340611	0.308736
0.446931	0.469191	0.493304	0.393858	0.386654	0.332857	0.679807	0.531144	0.53924	0.339693	0.47278	0.322507	0.535735	0.660675	0.493873	0.5968			0.316015	0.29473	0.340846	0.416941	0.397764	0.235442	0.308401	0.347555	0.449185	0.223995	0.315016	0.298253	0.439733	0.338706	0.302398	0.308447
0.470821	0.54154	0.430536	0.421612	0.391407	0.402395	0.619413	0.543262	0.446786	0.297905	0.613422	0.266873	0.595843	0.493892	0.465876	0.675314			0.342075	0.300997	0.342014	0.309322	0.466773	0.449318	0.310388	0.372129	0.45833	0.154145	0.336512	0.295265	0.328279	0.354812	0.35507	0.549195
0.498048	0.590883	0.611529	0.473481	0.326191	0.380746	0.49618	0.543974	0.406592	0.431872	0.611227	0.383716	0.406215	0.522189	0.455596	0.475204			0.369267	0.367094	0.386714	0.259038	0.311519	0.444255	0.315244	0.351234	0.490158	0.141929	0.297932	0.357794	0.226672	0.45334	0.383148	0.462669
0.494131	0.44088	0.527842	0.399194	0.329317	0.508608	0.484051	0.497359	0.415859	0.509361	0.665834	0.295017	0.366757	0.486153	0.451616	0.746439			0.409299	0.321026	0.338845	0.223367	0.311763	0.405584	0.324068	0.34179	0.413944	0.156677	0.304077	0.329377	0.217803	0.329655	0.342295	0.449121
0.494795	0.408774	0.612793	0.464382	0.356249	0.380642	0.444284	0.670112	0.41886	0.499562	0.546966	0.27818	0.418997	0.441822	0.586075	0.950374			0.319018	0.495578	0.361645	0.305687	0.329762	0.464872	0.298567	0.330162	0.297534	0.174351	0.316344	0.245266	0.233289	0.293692	0.370426	0.43868
0.724058	0.445604	0.588205	0.468531	0.340046	0.476856	0.463507	0.636134	0.458982	0.463035	0.457523	0.301669	0.352725	0.562126	0.602376	0.747512			0.394101	0.548047	0.483434	0.286292	0.236848	0.425473	0.323426	0.346213	0.296229	0.140801	0.442441	0.248933	0.258378	0.33701	0.309176	0.569414
0.594353	0.472812	0.579776	0.481991	0.359636	0.692595	0.487222	0.49043	0.557806	0.353042	0.445341	0.432176	0.275707	0.635151	0.688536	0.537211			0.450349	0.514892	0.53497	0.26249	0.214986	0.309204	0.390323	0.421978	0.29849	0.141237	0.413302	0.270496	0.274242	0.372858	0.340693	0.607139
0.480742	0.522708	0.547091	0.416812	0.344135	0.596805	0.666562	0.540954	0.627724	0.293672	0.448096	0.216462	0.530946	0.603181	0.65586	0.471646			0.472163	0.359992	0.427266	0.264514	0.223442	0.31909	0.455153	0.617923	0.329489	0.178245	0.423853	0.425374	0.265625	0.388475	0.350689	0.417668
0.439052	0.487196	0.416229	0.441658	0.472785	0.504449	0.749175	0.537189	0.653572	0.272834	0.508001	0.273194	0.471313	0.449907	0.684485	0.458091			0.500864	0.276349	0.452707	0.267207	0.205778	0.381494	0.518046	0.508723	0.354383	0.145907	0.48299	0.295574	0.28547	0.351212	0.469075	0.270235
0.443839	0.441941	0.495143	0.439568	0.556039	0.533989	0.698878	0.640453	0.519729	0.284444	0.48198	0.343815	0.606013	0.496562	0.546769	0.502798			0.452159	0.314431	0.523525	0.263168	0.234145	0.263889	0.489713	0.469216	0.338069	0.137246	0.457708	0.224335	0.342288	0.342717	0.492165	0.291443
0.67803	0.430022	0.466038	0.482874	0.594212	0.530388	0.592739	0.596087	0.553843	0.317508	0.605831	0.311859	0.602526	0.443888	0.728935	0.693207			0.343581	0.351504	0.440393	0.273787	0.238239	0.222479	0.52354	0.407627	0.404692	0.148473	0.321505	0.218003	0.387941	0.561746	0.624215	0.509062
0.757339	0.588351	0.590996	0.55567	0.379109	0.453126	0.470943	0.562856	0.509783	0.353825	0.669918	0.310289	0.591712	0.449158	0.493482	0.670704			0.305122	0.456827	0.364366	0.371962	0.332566	0.328896	0.419291	0.31399	0.448582	0.315113	0.369096	0.317322	0.402367	0.464296	0.510064	0.450771
0.64666	0.664123	0.612168	0.369169	0.5764	0.461246	0.492752	0.51115	0.515489	0.363817	0.570243	0.297068	0.608822	0.503069	0.473589	0.48711			0.333236	0.471008	0.417165	0.458301	0.468974	0.183835	0.31721	0.385944	0.463183	0.344896	0.331452	0.234865	0.427426	0.475764	0.347374	0.309136
0.743307	0.660372	0.574797	0.414995	0.509714	0.422498	0.490426	0.65539	0.508271	0.498832	0.54086	0.410932	0.380693	0.591281	0.489286	0.68632			0.370119	0.476103	0.410244	0.427586	0.311002	0.254152	0.369302	0.45111	0.483031	0.241231	0.420469	0.293864	0.45189	0.376156	0.398804	0.313239
0.630087	0.536272	0.727349	0.463527	0.416722	0.415136	0.495113	0.670876	0.582426	0.352921	0.502279	0.410518	0.340902	0.639344	0.718916	0.54489			0.426508	0.462086	0.468134	0.377317	0.46482	0.430823	0.333675	0.374801	0.509306	0.19611	0.501846	0.293144	0.334942	0.386225	0.30449	0.416245
0.457861	0.629337	0.513872	0.534693	0.373526	0.356454	0.620132	0.65369	0.635431	0.304503	0.450985	0.42663	0.447706	0.569743	0.512935	0.489621			0.566398	0.499496	0.4741	0.377639	0.418629	0.381826	0.42594	0.402046	0.497654	0.157595	0.349338	0.31017	0.268629	0.403111	0.391997	0.285531
0.503642	0.536762	0.480418	0.51832	0.399579	0.504803	0.715525	0.633693	0.629072	0.357367	0.547269	0.224924	0.384086	0.536018	0.570878	0.713945			0.471636	0.409626	0.386201	0.365367	0.352396	0.432664	0.619924	0.545821	0.335298	0.169009	0.354036	0.426112	0.295181	0.403	0.584719	0.508463
0.821711	0.456883	0.600487	0.756805	0.412487	0.488104	0.793528	0.780239	0.712776	0.521191	0.69883	0.451962	0.682496	0.523865	0.686411	0.847937			0.409656	0.440389	0.557567	0.278658	0.371027	0.462294	0.563164	0.490484	0.341091	0.241535	0.353367	0.450947	0.327937	0.642914	0.522761	0.558156
0.752237	0.399729	0.768479	0.637648	0.444201	0.514417	0.625693	0.735697	0.639948	0.516289	0.748014	0.4266	0.613909	0.641622	0.633602	0.765081			0.326721	0.371623	0.537131	0.385725	0.273559	0.359776	0.656961	0.611347	0.346863	0.374644	0.417599	0.398586	0.354991	0.528378	0.636282	0.52946
0.692219	0.391693	0.75325	0.523665	0.459205	0.656111	0.667134	0.671279	0.635148	0.613114	0.616149	0.327162	0.444665	0.677023	0.761374	0.76378			0.467115	0.332008	0.494588	0.397557	0.221933	0.391926	0.550519	0.612936	0.433323	0.319004	0.634514	0.290042	0.406012	0.552661	0.474955	0.708959
0.760271	0.467622	0.573723	0.510541	0.36279	0.593188	0.58426	0.789995	0.557242	0.341704	0.541877	0.256553	0.470781	0.767813	0.770489	0.736938			0.607435	0.588257	0.571612	0.35838	0.207495	0.418042	0.560885	0.625878	0.509112	0.204699	0.577949	0.393965	0.528861	0.68909	0.542997	0.547964
0.751597	0.520368	0.584653	0.604779	0.295253	0.494887	0.526856	0.922362	0.630771	0.48746	0.558095	0.452838	0.39074	0.702208	0.695782	0.813841			0.588132	0.428038	0.560653	0.268091	0.414767	0.392945	0.528105	0.697787	0.53722	0.201896	0.688981	0.420902	0.349569	0.615194	0.573232	0.773742
0.700344	0.568859	0.68347	0.507205	0.337027	0.564864	0.675572	0.855233	0.733022	0.32288	0.694653	0.434132	0.340028	0.59081	0.721747	0.75068			0.497274	0.385623	0.405663	0.348042	0.327495	0.402193	0.571909	0.581545	0.485285	0.317871	0.474857	0.46558	0.39294	0.512135	0.571984	0.575326
0.641072	0.659863	0.658203	0.429037	0.457905	0.520535	0.740899	0.799052	0.5925	0.437229	0.674517	0.197437	0.437244	0.673724	0.739836	0.797175			0.553442	0.496926	0.494211	0.298036	0.35311	0.396624	0.602806	0.588588	0.595333	0.205047	0.539176	0.420777	0.550777	0.595455	0.595213	0.647182
0.693334	0.595431	0.629124	0.417364	0.632001	0.67152	0.79909	0.68131	0.617949	0.570439	0.701181	0.362229	0.415996	0.684016	0.536823	0.721135			0.627155	0.430891	0.601951	0.374754	0.451672	0.444985	0.552472	0.575123	0.574501	0.128675	0.575246	0.406079	0.477493	0.534975	0.549964	0.67955
0.726216	0.641355	0.638981	0.55148	0.466957	0.500532	0.740263	0.802828	0.562968	0.512731	0.580256	0.360743	0.456348	0.644906	0.599703	0.857696			0.536928	0.682402	0.534062	0.394192	0.363452	0.373653	0.563229	0.670147	0.532065	0.264223	0.51205	0.413986	0.45962	0.519102	0.52187	0.590873
0.97024	0.61732	0.541613	0.460062	0.4539	0.529065	0.744761	0.794538	0.561334	0.480716	0.534785	0.318484	0.524177	0.669802	0.60538	0.715861			0.568699	0.461696	0.556687	0.36099	0.448531	0.463863	0.606108	0.646703	0.535958	0.310124	0.560927	0.387864	0.39366	0.482745	0.50658	0.607481
0.676522	0.655366	0.657338	0.657766	0.437018	0.493079	0.808402	0.848896	0.547344	0.487963	0.755885	0.226253	0.44357	0.597521	0.544559	0.805048			0.512664	0.540467	0.459053	0.412084	0.4	0.497155	0.534457	0.644178	0.53946	0.344118	0.601727	0.260641	0.576443	0.453527	0.59821	0.596917
0.613209	0.648327	0.593051	0.544013	0.438527	0.518051	0.679891	0.665951	0.580413	0.424185	0.58124	0.389009	0.571485	0.444032	0.541868	0.70613			0.509578	0.660797	0.49176	0.540214	0.326799	0.503068	0.558355	0.682815	0.615281	0.345658	0.559757	0.397935	0.317879	0.524701	0.555193	0.635148
0.770926	0.579776	0.60616	0.582033	0.590476	0.507953	0.795023	0.690868	0.681332	0.3393	0.445179	0.492422	0.39306	0.559069	0.847529	0.77136			0.436065	0.496588	0.595331	0.435525	0.387868	0.427629	0.551647	0.623891	0.547072	0.336401	0.500541	0.435184	0.495984	0.613091	0.426185	0.569818
0.545888	0.584986	0.603036	0.679279	0.605393	0.546492	0.833416	0.809894	0.785737	0.368424	0.40744	0.317479	0.361657	0.719378	0.810788	0.819551			0.432537	0.45075	0.50425	0.407807	0.390177	0.384596	0.617226	0.653401	0.655931	0.332477	0.463034	0.32695	0.459285	0.513624	0.43613	0.516733
0.446636	0.638709	0.615901	0.655477	0.506472	0.617023	0.649857	0.918303	0.690727	0.480145	0.614924	0.24909	0.394436	0.713551	0.704528	0.801531			0.512829	0.310792	0.526425	0.481853	0.471198	0.42923	0.613861	0.713084	0.599867	0.211	0.545275	0.245748	0.49818	0.438559	0.515169	0.600253
0.684185	0.646344	0.606161	0.650854	0.535724	0.496871	0.711989	0.930283	0.61493	0.494611	0.519821	0.485075	0.548811	0.754534	0.657809	0.82773			0.551957	0.38785	0.694799	0.421785	0.451178	0.436185	0.562708	0.60388	0.552722	0.187009	0.612125	0.227316	0.371849	0.546527	0.359444	0.625293
0.757119	0.51863	0.607344	0.590122	0.40449	0.548313	0.686399	0.775765	0.704151	0.491182	0.573345	0.422882	0.446521	0.581943	0.641997	0.713353			0.658779	0.521518	0.569952	0.330302	0.352652	0.458353	0.546347	0.564784	0.592217	0.317762	0.569624	0.219973	0.342989	0.603304	0.592078	0.528323
0.653394	0.592101	0.584007	0.485738	0.419779	0.534573	0.788936	0.809963	0.549686	0.581769	0.632382	0.497692	0.445232	0.604671	0.623642	0.790733			0.556717	0.567251	0.521702	0.390976	0.393837	0.380054	0.53616	0.667837	0.551383	0.327209	0.505893	0.284033	0.414374	0.572582	0.533068	0.525904
0.548194	0.528756	0.60232	0.546481	0.58675	0.704179	0.625044	0.945996	0.617475	0.374202	0.513523	0.592398	0.610189	0.477924	0.566562	0.89717			0.493129	0.48404	0.483434	0.500941	0.350164	0.561426	0.49332	0.647318	0.511647	0.20864	0.541367	0.452397	0.445835	0.537473	0.42942	0.634562
0.414825	0.402714	0.576948	0.621797	0.528026	0.488751	0.761429	0.856839	0.629925	0.307248	0.529832	0.355833	0.49315	0.470243	0.464569	0.78479			0.454804	0.488487	0.358446	0.458204	0.319833	0.553755	0.36067	0.647732	0.488645	0.222452	0.540896	0.383596	0.46387	0.463174	0.465732	0.653478
0.490509	0.391178	0.563899	0.50373	0.442445	0.534713	0.702886	0.913268	0.510046	0.457803	0.572225	0.420155	0.435468	0.580702	0.698646	0.833677			0.351718	0.347121	0.347274	0.398469	0.354937	0.350856	0.388534	0.671841	0.579719	0.168958	0.567646	0.460504	0.36524	0.496609	0.450456	0.522142
0.619795	0.405671	0.442574	0.477691	0.559471	0.480791	0.63251	0.837773	0.442575	0.4562	0.510679	0.421096	0.433798	0.671758	0.57218	0.746106			0.456917	0.336638	0.382568	0.384616	0.343473	0.371944	0.594906	0.571701	0.60015	0.218764	0.507631	0.277484	0.333918	0.40798	0.365881	0.554157
0.707553	0.488787	0.51937	0.574303	0.406147	0.449836	0.608366	0.750061	0.571788	0.394054	0.517582	0.336115	0.420061	0.622729	0.583902	0.762622			0.372057	0.365298	0.451437	0.419772	0.436567	0.415127	0.56151	0.626002	0.501336	0.332319	0.574786	0.2218	0.395491	0.310263	0.412897	0.539727
0.516695	0.406965	0.674436	0.420637	0.379995	0.534113	0.766485	0.83906	0.526631	0.514956	0.517278	0.230846	0.436733	0.597185	0.533756	0.823752			0.376184	0.320266	0.542247	0.434751	0.395838	0.417033	0.564277	0.493392	0.546373	0.244205	0.580972	0.314072	0.411025	0.308908	0.424503	0.613633
0.626474	0.464708	0.462225	0.419648	0.312727	0.475075	0.755864	0.918083	0.484614	0.485294	0.773691	0.209353	0.406867	0.606885	0.556889	0.686821			0.378537	0.40223	0.506798	0.459727	0.342185	0.34508	0.525562	0.436596	0.543736	0.146227	0.542328	0.351099	0.298054	0.361826	0.527607	0.531095
0.559253	0.460021	0.600688	0.508356	0.3373	0.638082	0.728525	0.830145	0.581782	0.500632	0.696016	0.327232	0.515175	0.515057	0.566821	0.703835			0.382678	0.429665	0.55936	0.387766	0.363858	0.382824	0.585821	0.625008	0.467583	0.218926	0.436342	0.22631	0.275415	0.461223	0.501101	0.570238
0.592377	0.523714	0.474759	0.576563	0.357539	0.510393	0.803473	0.76939	0.698025	0.322927	0.739892	0.257339	0.540977	0.603085	0.605837	0.73479			0.361125	0.320194	0.605643	0.31552	0.342126	0.469607	0.615707	0.607157	0.442356	0.167683	0.531571	0.289737	0.275406	0.504133	0.379242	0.555713
0.571209	0.583302	0.638601	0.611887	0.369115	0.382155	0.630656	0.673351	0.534216	0.387658	0.611261	0.345701	0.40045	0.733015	0.536134	0.749507			0.436997	0.440795	0.558411	0.273755	0.412695	0.48351	0.583755	0.45184	0.346942	0.1655	0.481601	0.360977	0.302791	0.482219	0.445333	0.509625
0.709603	0.389756	0.623824	0.583387	0.370872	0.465743	0.505591	0.833811	0.506015	0.387313	0.669442	0.407107	0.440663	0.570499	0.730623	0.956851			0.432125	0.597861	0.566312	0.339633	0.43604	0.357201	0.538756	0.686056	0.308111	0.167843	0.471587	0.320727	0.282463	0.341488	0.587587	0.548107
0.840013	0.40892	0.49153	0.562312	0.37804	0.314354	0.430752	0.839174	0.472446	0.307645	0.634545	0.333798	0.476884	0.560117	0.520459	0.679574			0.483275	0.574512	0.503842	0.274671	0.34499	0.43716	0.54917	0.630375	0.32114	0.158108	0.562577	0.246919	0.27915	0.330576	0.621289	0.550058
0.811964	0.448507	0.53719	0.542869	0.347212	0.361845	0.484225	0.742326	0.52714	0.300069	0.578831	0.302161	0.577628	0.61818	0.551639	0.721812			0.390311	0.61339	0.406582	0.367293	0.387285	0.439178	0.590853	0.637138	0.356142	0.206652	0.502049	0.378454	0.288878	0.376243	0.603219	0.526303
0.663132	0.474935	0.508948	0.52762	0.346919	0.37289	0.606387	0.805198	0.470696	0.322061	0.438473	0.299319	0.380929	0.711573	0.493397	0.660698			0.520997	0.573731	0.494906	0.467297	0.312795	0.301748	0.544456	0.736124	0.390876	0.404451	0.484324	0.384466	0.310625	0.379092	0.551744	0.572763
0.683136	0.590958	0.585264	0.628686	0.364729	0.352903	0.830052	0.829718	0.563031	0.487159	0.429096	0.374623	0.459291	0.768445	0.679268	0.743406			0.50068	0.46534	0.555707	0.363492	0.33538	0.276041	0.678559	0.64277	0.378331	0.249076	0.480066	0.445102	0.281799	0.450381	0.667977	0.545759
0.784076	0.649649	0.531001	0.668019	0.372548	0.513003	0.830142	0.736799	0.577905	0.405438	0.508667	0.329063	0.368723	0.626281	0.532743	0.777873			0.404244	0.496993	0.464818	0.35023	0.348019	0.21517	0.563458	0.580786	0.357225	0.2848	0.463541	0.496643	0.404094	0.479508	0.524637	0.485244
0.556546	0.567402	0.671803	0.528273	0.352067	0.434519	0.905886	0.603983	0.618178	0.329375	0.717551	0.363268	0.361313	0.569759	0.581317	0.738737			0.418061	0.540702	0.385914	0.328839	0.285322	0.277947	0.468946	0.622612	0.3463	0.321692	0.47263	0.457489	0.422188	0.388152	0.693708	0.613535
0.45309	0.605497	0.690612	0.568381	0.322028	0.398022	0.752868	0.543878	0.625276	0.397349	0.544446	0.52689	0.394927	0.55092	0.653104	0.76235			0.439659	0.58677	0.481404	0.331387	0.228522	0.261058	0.432829	0.382922	0.443917	0.20719	0.552354	0.428881	0.389284	0.420274	0.541335	0.551779
0.560618	0.711744	0.559921	0.404075	0.339082	0.758413	0.724635	0.54147	0.755269	0.362817	0.598636	0.483077	0.376612	0.595252	0.563532	0.767984			0.584089	0.561478	0.514898	0.345931	0.218158	0.275952	0.551682	0.517612	0.489162	0.312832	0.460544	0.314966	0.348738	0.37465	0.548438	0.539005
0.546626	0.561573	0.575801	0.428274	0.328438	0.626263	0.753827	0.457985	0.823522	0.547579	0.679583	0.219772	0.458191	0.644513	0.512379	0.708282			0.569038	0.509108	0.597686	0.399192	0.31038	0.262028	0.578048	0.669811	0.529916	0.360523	0.520395	0.35319	0.427889	0.437341	0.520944	0.638611
0.780448	0.722043	0.573155	0.568256	0.371515	0.487222	0.739041	0.743984	0.710343	0.732909	0.686211	0.408179	0.443542	0.543117	0.64451	0.702768			0.42312	0.539425	0.595785	0.425538	0.28782	0.366723	0.521181	0.75373	0.509614	0.361706	0.578016	0.503869	0.463017	0.530874	0.44209	0.558217
0.563559	0.60128	0.479722	0.480555	0.502899	0.472926	0.653049	0.8197	0.616334	0.533941	0.603747	0.526963	0.649196	0.515733	0.798366	0.681912			0.349007	0.479958	0.530617	0.527491	0.279817	0.162566	0.497802	0.678042	0.620428	0.168584	0.448603	0.414423	0.45009	0.543775	0.328442	0.598537
0.675588	0.51067	0.697454	0.468859	0.449922	0.566671	0.589155	0.823146	0.686796	0.490256	0.697125	0.379343	0.543869	0.618207	0.593552	0.733876			0.356618	0.603733	0.508072	0.419274	0.232648	0.35904	0.46704	0.693902	0.644192	0.168691	0.40436	0.382976	0.343976	0.549235	0.400228	0.558059
0.507043	0.561977	0.727898	0.400746	0.552003	0.378891	0.452258	0.734325	0.649515	0.490265	0.711349	0.408492	0.506685	0.612802	0.687038	0.647254			0.445415	0.61566	0.442779	0.403008	0.264257	0.573921	0.486054	0.54313	0.56159	0.356736	0.490916	0.467151	0.445728	0.589105	0.518915	0.540373
0.52528	0.559512	0.615662	0.482776	0.414731	0.485722	0.441314	0.700741	0.531655	0.511002	0.545344	0.334285	0.499779	0.595616	0.560977	0.438727			0.503807	0.446785	0.404783	0.434157	0.271336	0.471297	0.522747	0.404662	0.61836	0.218049	0.460381	0.302827	0.466277	0.71212	0.343414	0.615909
0.53178	0.584421	0.622138	0.500297	0.505488	0.483747	0.55595	0.834823	0.435765	0.357378	0.578816	0.284682	0.449393	0.568634	0.839177	0.667777			0.649295	0.541859	0.354678	0.510198	0.278981	0.377388	0.469085	0.397978	0.500838	0.149152	0.412664	0.219078	0.310694	0.499392	0.346003	0.53795
0.620787	0.616014	0.633987	0.540025	0.604291	0.657859	0.7332	0.595373	0.390289	0.358047	0.508995	0.321146	0.399298	0.529314	0.827959	0.525391			0.600154	0.441758	0.463102	0.511804	0.26389	0.433993	0.387881	0.583111	0.499758	0.144045	0.277661	0.271775	0.259518	0.533155	0.495804	0.586242
0.828822	0.540344	0.630299	0.544942	0.600883	0.53544	0.582819	0.644023	0.414082	0.34132	0.476508	0.256678	0.380484	0.601698	0.653885	0.527692			0.579832	0.379889	0.47488	0.481481	0.23518	0.498375	0.33872	0.673355	0.469129	0.262115	0.300216	0.251478	0.316499	0.623569	0.493287	0.681415
0.722658	0.581262	0.571807	0.518457	0.430383	0.540423	0.591047	0.662645	0.426291	0.378829	0.489212	0.33564	0.472424	0.564172	0.556132	0.448738			0.560888	0.270292	0.482907	0.410198	0.236109	0.464085	0.285644	0.6049	0.493004	0.330435	0.373638	0.241014	0.268903	0.557874	0.437359	0.553267
0.810356	0.502307	0.596533	0.444149	0.445992	0.540886	0.650157	0.756844	0.485607	0.403983	0.592698	0.360817	0.493384	0.582188	0.530836	0.565612			0.51691	0.255714	0.501909	0.438363	0.275	0.452186	0.297248	0.54348	0.695308	0.227613	0.358231	0.311872	0.294897	0.500953	0.409832	0.528882
0.846181	0.482177	0.528485	0.436393	0.448698	0.547349	0.708211	0.819202	0.598375	0.50236	0.631159	0.413734	0.524674	0.553703	0.537071	0.500983			0.535203	0.2903	0.609787	0.485763	0.25242	0.341446	0.297789	0.712373	0.486879	0.288681	0.345504	0.354708	0.308372	0.453264	0.345216	0.407314
0.782157	0.387189	0.516303	0.473442	0.540575	0.501997	0.927254	0.768983	0.546379	0.690171	0.622969	0.296306	0.522223	0.63608	0.557993	0.542967			0.549938	0.360576	0.59251	0.476335	0.238459	0.398533	0.336623	0.623702	0.525395	0.389416	0.346909	0.34214	0.377606	0.430941	0.35384	0.441819
0.612339	0.393436	0.573423	0.561915	0.463128	0.454068	0.683623	0.808308	0.537848	0.563963	0.473619	0.271764	0.478472	0.568366	0.570177	0.484546			0.620632	0.349882	0.657247	0.494351	0.244438	0.392555	0.37624	0.635163	0.585921	0.487003	0.414232	0.355158	0.261239	0.338135	0.408639	0.495038
0.555526	0.41251	0.59411	0.565358	0.595817	0.532402	0.650087	0.532357	0.552292	0.561659	0.476097	0.406817	0.600991	0.587454	0.613121	0.439321			0.562406	0.332287	0.401859	0.426679	0.304599	0.381739	0.33187	0.629447	0.496149	0.352052	0.418571	0.35121	0.306669	0.344872	0.456187	0.411953
0.571172	0.382275	0.646072	0.608396	0.404976	0.639968	0.737426	0.67532	0.576611	0.497319	0.571951	0.297091	0.51627	0.619312	0.520648	0.671993			0.565683	0.322401	0.43246	0.383327	0.349374	0.466222	0.407453	0.726705	0.468613	0.391341	0.39346	0.390364	0.359796	0.377571	0.35254	0.266281
0.526579	0.489872	0.72644	0.680351	0.566785	0.584541	0.589657	0.511541	0.847195	0.494085	0.595828	0.297433	0.469009	0.850701	0.604288	0.668483			0.642865	0.308177	0.4931	0.447446	0.38697	0.391514	0.440483	0.689198	0.464254	0.441847	0.439029	0.35092	0.407513	0.400194	0.360823	0.488642
0.680404	0.516513	0.632344	0.622284	0.46255	0.55767	0.798234	0.746328	0.699834	0.577494	0.74071	0.257686	0.455355	0.772367	0.539654	0.834915			0.534491	0.387759	0.553635	0.379534	0.464068	0.370962	0.46602	0.55014	0.352161	0.332083	0.53515	0.239968	0.565172	0.429679	0.372472	0.542593
0.653012	0.378952	0.882305	0.660956	0.480514	0.469652	0.677558	0.602997	0.727543	0.385881	0.730015	0.329572	0.357683	0.691401	0.566315	0.756437			0.474745	0.367268	0.500114	0.409278	0.314806	0.407271	0.360284	0.551072	0.289104	0.428408	0.387634	0.36425	0.443553	0.548158	0.550543	0.520954
0.496196	0.366482	0.641424	0.622676	0.589202	0.479633	0.561138	0.588044	0.595026	0.424506	0.640658	0.425704	0.432302	0.554664	0.567244	0.831347			0.376561	0.330069	0.657134	0.308233	0.410262	0.389249	0.324512	0.572883	0.29951	0.365075	0.308855	0.386846	0.526226	0.525261	0.424395	0.3876
0.567106	0.482873	0.670862	0.628729	0.552068	0.314404	0.452722	0.551445	0.570852	0.353123	0.720256	0.377536	0.37657	0.800696	0.626672	0.765329			0.338967	0.35511	0.483641	0.296216	0.507861	0.274116	0.335695	0.478424	0.313622	0.334499	0.367542	0.211975	0.453651	0.372411	0.513418	0.240886
0.481844	0.457927	0.687033	0.521135	0.360432	0.294282	0.434495	0.704219	0.625077	0.318729	0.663565	0.394971	0.350426	0.756809	0.557151	0.771176			0.292697	0.44614	0.575051	0.256608	0.499239	0.236703	0.383902	0.471724	0.297964	0.37035	0.439687	0.423254	0.463063	0.367965	0.631171	0.494033
0.515542	0.647387	0.742355	0.577849	0.413588	0.364245	0.453597	0.755402	0.574377	0.440362	0.627874	0.285371	0.390263	0.67035	0.550446	0.673461			0.406338	0.532435	0.578858	0.277833	0.367062	0.252686	0.397097	0.367288	0.329005	0.32928	0.613487	0.422463	0.437975	0.418328	0.528987	0.45001
0.554588	0.487767	0.512989	0.576787	0.560825	0.36672	0.651518	0.701485	0.423287	0.309117	0.637359	0.305683	0.405349	0.678952	0.561856	0.778547			0.354414	0.480969	0.715906	0.271665	0.300736	0.31544	0.359936	0.355254	0.290331	0.373432	0.631935	0.41116	0.368574	0.53067	0.546887	0.26092
0.75574	0.443832	0.528244	0.63709	0.587997	0.348498	0.617672	0.637112	0.407477	0.277964	0.653513	0.523697	0.372049	0.628949	0.553863	0.802462			0.376524	0.357271	0.57949	0.276129	0.370941	0.24024	0.378571	0.396749	0.34229	0.357604	0.488706	0.355706	0.338557	0.498406	0.596378	0.311534
0.658546	0.430292	0.515767	0.536127	0.476866	0.455841	0.617761	0.715336	0.443976	0.276277	0.689649	0.438818	0.454324	0.603151	0.765226	0.693619			0.338477	0.33978	0.601634	0.297243	0.381327	0.260393	0.592614	0.374293	0.333761	0.258913	0.642197	0.395692	0.390215	0.346841	0.534706	0.328469
0.560425	0.447975	0.541726	0.513351	0.449934	0.448661	0.544559	0.762419	0.51645	0.30036	0.675833	0.244846	0.459138	0.504223	0.771843	0.696056			0.374868	0.451018	0.510335	0.275788	0.329379	0.270377	0.704398	0.342065	0.362572	0.248315	0.477034	0.38353	0.3491	0.425314	0.532668	0.375808
0.464542	0.366314	0.643876	0.378333	0.575743	0.374433	0.494808	0.854301	0.468022	0.305626	0.587007	0.352333	0.362768	0.461407	0.667452	0.629526			0.458076	0.496055	0.520645	0.312373	0.404172	0.309465	0.570367	0.424045	0.368993	0.291499	0.5503	0.521085	0.417917	0.43431	0.569175	0.328285
0.609463	0.408339	0.611586	0.474179	0.358736	0.395232	0.45623	0.763161	0.588674	0.347438	0.544356	0.341176	0.449647	0.429644	0.720899	0.489538			0.538085	0.368083	0.569097	0.369902	0.420134	0.268356	0.572193	0.41983	0.442355	0.261825	0.585149	0.340286	0.467131	0.327202	0.625684	0.319058
0.449857	0.431705	0.418601	0.395171	0.346626	0.392951	0.536762	0.615847	0.480033	0.489787	0.50457	0.343067	0.484575	0.465583	0.702024	0.708069			0.423582	0.491675	0.458271	0.43689	0.370426	0.292266	0.589649	0.416271	0.459083	0.166092	0.55508	0.401069	0.410027	0.421488	0.481348	0.368806
0.552644	0.499237	0.519271	0.602347	0.306039	0.394884	0.461328	0.631326	0.50393	0.401203	0.450406	0.444597	0.49178	0.501982	0.738351	0.640483			0.382214	0.381352	0.56738	0.473085	0.334135	0.455257	0.602532	0.436382	0.563555	0.167627	0.481135	0.325115	0.288374	0.506897	0.573308	0.384809
0.485267	0.439472	0.536507	0.501646	0.344355	0.537276	0.480047	0.590136	0.499939	0.319743	0.447416	0.447217	0.515564	0.479347	0.691993	0.557412			0.350309	0.48419	0.549927	0.40538	0.339089	0.501076	0.528282	0.503555	0.491731	0.245027	0.485766	0.297113	0.246553	0.465234	0.64019	0.501191
0.617034	0.45551	0.547341	0.615198	0.395645	0.59861	0.478528	0.757134	0.487925	0.285877	0.485815	0.284299	0.558951	0.505779	0.707025	0.466552			0.377686	0.557103	0.525621	0.257459	0.294899	0.374805	0.579735	0.52703	0.5519	0.350473	0.551174	0.354343	0.245106	0.437421	0.509967	0.541908
0.554003	0.637727	0.614046	0.507877	0.324499	0.575423	0.557045	0.832245	0.54111	0.304644	0.439947	0.417938	0.443959	0.570874	0.62678	0.455802			0.395412	0.62678	0.447188	0.269985	0.314047	0.383944	0.518091	0.423329	0.519958	0.224856	0.517162	0.325194	0.302146	0.390746	0.566278	0.677999
0.735525	0.588018	0.634927	0.495155	0.398261	0.699382	0.417678	0.718071	0.4876	0.342548	0.447554	0.400404	0.390016	0.69852	0.57607	0.659245			0.507432	0.423908	0.54929	0.315501	0.371511	0.386374	0.664665	0.374872	0.646194	0.20169	0.528859	0.393415	0.32171	0.348575	0.548277	0.611982
0.703302	0.633025	0.7138	0.603988	0.428553	0.524738	0.635712	0.597082	0.491987	0.335263	0.422904	0.275019	0.388044	0.54009	0.577087	0.502268			0.575818	0.320319	0.499856	0.28512	0.340197	0.378184	0.541075	0.482011	0.541465	0.222019	0.576989	0.300007	0.287444	0.335924	0.601806	0.609232
0.546653	0.589573	0.815139	0.580801	0.418813	0.494795	0.793189	0.566919	0.517384	0.315887	0.46937	0.239449	0.459934	0.499557	0.491082	0.535584			0.485466	0.298498	0.379538	0.275896	0.270897	0.448425	0.502343	0.454685	0.481774	0.174499	0.562539	0.208992	0.288414	0.352989	0.579294	0.605954
0.493066	0.572472	0.736628	0.570437	0.333685	0.672545	0.84246	0.540656	0.552064	0.325345	0.426254	0.439251	0.392815	0.529165	0.476649	0.541516			0.36018	0.32249	0.389445	0.337009	0.233469	0.375637	0.43139	0.509735	0.46764	0.159243	0.524715	0.210261	0.279206	0.36686	0.641769	0.595396
0.518236	0.504643	0.727499	0.462679	0.289316	0.560703	0.742113	0.679863	0.593294	0.352403	0.480099	0.514447	0.373897	0.510725	0.51559	0.560438			0.33885	0.321559	0.510578	0.310991	0.244211	0.352955	0.422343	0.6459	0.459156	0.203615	0.434733	0.262398	0.306484	0.483817	0.51101	0.56694
0.574179	0.513447	0.637016	0.586002	0.307689	0.544509	0.749498	0.7527	0.552767	0.278597	0.39699	0.487471	0.36056	0.639685	0.638709	0.642253			0.376655	0.339927	0.416677	0.300343	0.314758	0.291441	0.45617	0.618747	0.433403	0.202161	0.526496	0.379398	0.271884	0.486619	0.477583	0.588518
0.603324	0.556864	0.607535	0.711426	0.307091	0.480656	0.673066	0.816114	0.528577	0.309838	0.617552	0.518416	0.391931	0.581357	0.601957	0.562549			0.366984	0.386103	0.37945	0.288054	0.310072	0.242706	0.462168	0.628078	0.420869	0.291813	0.367526	0.369357	0.271753	0.59927	0.525115	0.666709
0.481622	0.522792	0.773887	0.584917	0.365312	0.52024	0.750194	0.716169	0.499675	0.342485	0.709644	0.312392	0.411184	0.466019	0.485199	0.611822			0.367677	0.431246	0.459472	0.329051	0.259831	0.234572	0.405336	0.718972	0.295144	0.227981	0.453349	0.401234	0.405906	0.643428	0.463414	0.536126
0.747739	0.599456	0.625392	0.469698	0.364627	0.512933	0.628844	0.652479	0.538388	0.286559	0.547171	0.400149	0.454061	0.478561	0.493191	0.747384			0.575674	0.397586	0.461878	0.485717	0.242278	0.282791	0.300701	0.60361	0.321217	0.147977	0.32071	0.290171	0.506722	0.540062	0.461658	0.580379
0.458688	0.595001	0.663099	0.372006	0.320736	0.470968	0.683259	0.606897	0.566997	0.333353	0.466454	0.296978	0.505807	0.559082	0.498088	0.526506			0.68015	0.400487	0.408015	0.507794	0.401145	0.370197	0.259664	0.586576	0.347952	0.164893	0.394242	0.235157	0.548202	0.552368	0.509316	0.532567
0.509709	0.395523	0.663942	0.426856	0.328488	0.321512	0.627946	0.615982	0.502022	0.353698	0.469984	0.428471	0.522968	0.611906	0.482985	0.485643			0.563704	0.321089	0.476325	0.521701	0.302716	0.277569	0.305114	0.71851	0.352247	0.253956	0.355853	0.296064	0.51825	0.523132	0.464328	0.47278
0.703535	0.373333	0.757691	0.4624	0.352593	0.385206	0.426759	0.543281	0.478052	0.292746	0.491821	0.32555	0.670624	0.514034	0.493104	0.532768			0.561778	0.480991	0.379578	0.450682	0.275755	0.310123	0.362238	0.676224	0.332639	0.203851	0.346228	0.343963	0.340716	0.544218	0.516709	0.469692
0.73181	0.377638	0.56117	0.473976	0.341056	0.394892	0.405747	0.614014	0.533542	0.2693	0.43041	0.356351	0.419519	0.563132	0.59653	0.545833			0.733393	0.498811	0.519591	0.382305	0.286125	0.325289	0.318523	0.57252	0.363814	0.324782	0.38578	0.440462	0.340896	0.484344	0.450484	0.467801
0.539981	0.422137	0.584704	0.543722	0.351534	0.437957	0.432344	0.503426	0.45609	0.37661	0.450023	0.399289	0.371808	0.580453	0.595559	0.69491			0.54579	0.462192	0.502518	0.386792	0.333785	0.397766	0.387466	0.477375	0.345122	0.35491	0.325682	0.268061	0.556306	0.546336	0.410708	0.425326
0.5711	0.381755	0.427237	0.382111	0.338424	0.352893	0.438447	0.625622	0.554303	0.299707	0.454158	0.253876	0.461384	0.570564	0.46405	0.647537			0.553157	0.473701	0.586017	0.447001	0.336455	0.388086	0.531632	0.356634	0.297116	0.35393	0.306359	0.226061	0.383719	0.455667	0.374816	0.402802
0.536405	0.46956	0.50063	0.46005	0.339024	0.3877	0.543148	0.737834	0.539011	0.306358	0.501812	0.279637	0.327708	0.686714	0.54169	0.902795			0.515679	0.357731	0.535982	0.483879	0.356503	0.234258	0.551727	0.335854	0.317813	0.313376	0.448294	0.261446	0.478781	0.466761	0.395058	0.408203
0.669034	0.568627	0.613733	0.496093	0.355144	0.426739	0.689634	0.549174	0.550061	0.342242	0.663875	0.314832	0.34621	0.60297	0.594451	0.6644			0.4218	0.367506	0.516369	0.44813	0.270887	0.254665	0.519667	0.326811	0.373905	0.367842	0.455384	0.278514	0.408348	0.41115	0.505361	0.383527
0.599822	0.456331	0.503589	0.516789	0.35574	0.385312	0.661884	0.621743	0.600605	0.523502	0.489732	0.357117	0.355037	0.652923	0.639726	0.700718			0.342773	0.407355	0.568542	0.402701	0.263136	0.270229	0.417512	0.421772	0.3158	0.323565	0.516541	0.29393	0.399464	0.3607	0.370655	0.409793
0.495043	0.466263	0.548492	0.414374	0.32473	0.375281	0.660146	0.640051	0.50428	0.539643	0.501091	0.360728	0.345449	0.558751	0.550182	0.674717			0.322508	0.500186	0.515978	0.38935	0.274073	0.286725	0.32074	0.4878	0.326987	0.300686	0.320495	0.325804	0.456646	0.347226	0.332919	0.300511
0.487539	0.466491	0.448262	0.596624	0.351586	0.410335	0.674626	0.581067	0.451851	0.520169	0.495952	0.303037	0.451705	0.509426	0.670371	0.673319			0.440709	0.534009	0.483332	0.393953	0.300537	0.224985	0.285061	0.461192	0.299032	0.419236	0.418931	0.341627	0.27956	0.370305	0.324831	0.326985
0.606779	0.587116	0.514019	0.417162	0.360071	0.561158	0.507031	0.549885	0.524981	0.406583	0.531538	0.432805	0.506158	0.501853	0.510078	0.604741			0.537556	0.470876	0.538506	0.444813	0.294385	0.20675	0.325023	0.354593	0.381431	0.361329	0.435158	0.252657	0.283155	0.347947	0.394018	0.373931
0.638862	0.53708	0.570947	0.45365	0.457746	0.540497	0.442784	0.673118	0.57936	0.351326	0.630059	0.278537	0.414258	0.538745	0.576094	0.677181			0.614453	0.334265	0.535379	0.452608	0.261237	0.275326	0.313505	0.394822	0.368615	0.234396	0.385723	0.260264	0.287816	0.355085	0.372501	0.376099
0.663925	0.537741	0.517016	0.577912	0.539136	0.498856	0.45037	0.6676	0.719722	0.299226	0.54099	0.311014	0.438808	0.5429	0.551609	0.726449			0.663108	0.323143	0.541523	0.401968	0.267607	0.250729	0.322066	0.497503	0.467138	0.186842	0.40058	0.264687	0.329645	0.355231	0.365609	0.366438
0.45632	0.547458	0.566415	0.546735	0.417737	0.452981	0.477488	0.679737	0.603092	0.450609	0.561834	0.282966	0.41475	0.556152	0.553696	0.695125			0.524103	0.435903	0.41285	0.38523	0.277161	0.396262	0.372189	0.475553	0.46198	0.141603	0.309532	0.324413	0.44013	0.463781	0.39252	0.321793
0.687734	0.636605	0.629837	0.557848	0.519819	0.75252	0.454429	0.649908	0.441002	0.495001	0.556825	0.271991	0.364807	0.467816	0.647742	0.6441			0.580409	0.512667	0.433153	0.533633	0.308348	0.533969	0.460687	0.385537	0.540712	0.154273	0.390606	0.300216	0.290384	0.343838	0.436049	0.319354
0.515475	0.753026	0.669783	0.58692	0.594811	0.509415	0.497491	0.809923	0.609169	0.471546	0.565736	0.396173	0.479851	0.514131	0.546069	0.545395			0.69216	0.539436	0.363048	0.399693	0.425426	0.418307	0.420151	0.397551	0.506685	0.235644	0.522262	0.362016	0.302514	0.468371	0.389458	0.386416
0.56217	0.546798	0.528883	0.729213	0.504136	0.490621	0.44943	0.699222	0.433979	0.568967	0.47952	0.338356	0.419143	0.595638	0.538448	0.510671			0.649456	0.402023	0.412186	0.480127	0.300556	0.481809	0.510074	0.377355	0.521954	0.230191	0.53022	0.286891	0.40259	0.490365	0.417437	0.543328
1.11272	0.477454	0.445547	0.526406	0.411026	0.477142	0.636552	0.701852	0.512442	0.368545	0.466992	0.325526	0.399359	0.646358	0.682555	0.478023			0.562616	0.518453	0.440843	0.405881	0.244539	0.263501	0.663236	0.458878	0.489915	0.238047	0.584266	0.45208	0.394756	0.374054	0.484955	0.626787
0.68718	0.581534	0.654883	0.459623	0.390249	0.385496	0.685416	0.841519	0.628096	0.301451	0.534382	0.263707	0.390171	0.477758	0.738101	0.515334			0.538915	0.367021	0.401083	0.405197	0.324696	0.239054	0.624835	0.465282	0.336215	0.244941	0.478475	0.294003	0.416675	0.374035	0.491051	0.658204
0.95423	0.588733	0.621564	0.509323	0.276168	0.261709	0.747154	0.592624	0.458895	0.330102	0.512405	0.465305	0.419653	0.536027	0.596683	0.565629			0.512723	0.441677	0.456348	0.438332	0.310285	0.301989	0.537725	0.49495	0.303567	0.21791	0.564903	0.322373	0.336644	0.523996	0.478879	0.548392
0.663536	0.538486	0.819162	0.432848	0.320954	0.275798	0.78057	0.570799	0.714167	0.433399	0.547458	0.38632	0.509683	0.666054	0.548996	0.71465			0.541596	0.473371	0.440704	0.316399	0.327302	0.376858	0.598558	0.468383	0.365059	0.156939	0.500648	0.351458	0.283949	0.547639	0.341457	0.604933
0.629817	0.363873	0.61037	0.407957	0.347658	0.335245	0.642292	0.511838	0.588509	0.399451	0.515392	0.477222	0.478571	0.593349	0.599952	0.652537			0.453198	0.388343	0.598871	0.275071	0.380923	0.341547	0.495539	0.644116	0.372406	0.259578	0.418781	0.415428	0.356122	0.710719	0.444789	0.489437
0.728293	0.379361	0.685405	0.50413	0.338657	0.374854	0.646428	0.484326	0.537151	0.491979	0.493891	0.347944	0.524951	0.536034	0.529056	0.528567			0.370696	0.515826	0.611488	0.261246	0.518802	0.384356	0.502067	0.678122	0.355709	0.242532	0.514624	0.284417	0.246149	0.750295	0.451536	0.507886
0.804002	0.445274	0.717938	0.454116	0.317468	0.376337	0.634952	0.685682	0.481091	0.576236	0.574055	0.443779	0.513849	0.57599	0.545472	0.697766			0.339982	0.515111	0.606479	0.277541	0.448173	0.398858	0.467742	0.648312	0.431084	0.257286	0.513172	0.251651	0.316816	0.513049	0.629444	0.394892
0.550992	0.510918	0.624981	0.583479	0.355548	0.387525	0.568418	0.689932	0.483143	0.48594	0.697057	0.28157	0.491517	0.587884	0.593149	0.738384			0.388437	0.52301	0.558122	0.271315	0.396528	0.386016	0.459891	0.651407	0.445282	0.339611	0.420771	0.385683	0.352679	0.561697	0.565665	0.333596
0.594738	0.53601	0.675658	0.587766	0.36394	0.442549	0.486355	0.871022	0.508535	0.356947	0.755134	0.400034	0.592589	0.625092	0.543814	0.765977			0.377511	0.694148	0.554022	0.405874	0.34334	0.424422	0.476918	0.589228	0.700659	0.393216	0.433977	0.341697	0.409135	0.561022	0.601494	0.267216
0.617526	0.577942	0.685092	0.505072	0.396747	0.568451	0.360662	0.786612	0.487935	0.301757	0.598243	0.343991	0.497675	0.642042	0.582297	0.627267			0.532974	0.530918	0.503701	0.379151	0.326249	0.226745	0.454227	0.656228	0.575966	0.329053	0.346523	0.422525	0.46708	0.591951	0.582347	0.290004
0.594266	0.584848	0.680633	0.692762	0.343896	0.620115	0.406669	0.768351	0.629886	0.479043	0.623852	0.480204	0.68702	0.734808	0.603347	0.653294			0.589351	0.552913	0.509051	0.321121	0.358578	0.374138	0.436673	0.705224	0.504277	0.35376	0.353081	0.395025	0.492778	0.609919	0.525863	0.311503
0.696043	0.899749	0.602156	0.670433	0.373518	0.531746	0.491557	0.548375	0.607171	0.496306	0.516015	0.309134	0.530763	0.651034	0.701303	0.532346			0.679376	0.471403	0.528468	0.436666	0.339936	0.37007	0.373135	0.599862	0.492216	0.367114	0.459093	0.343199	0.401454	0.557506	0.512383	0.364277
0.789182	0.666834	0.688453	0.742367	0.382268	0.441548	0.453417	0.514735	0.713966	0.38969	0.527676	0.483432	0.480402	0.592936	0.672169	0.545731			0.608469	0.557458	0.586997	0.468611	0.252717	0.398326	0.26946	0.603087	0.566782	0.398157	0.540753	0.316279	0.373187	0.562271	0.557688	0.493347
0.787395	0.466761	0.595711	0.650778	0.856458	0.498582	0.437808	0.592333	0.718855	0.513197	0.546699	0.511845	0.411365	0.83678	0.726073	0.505188			0.562401	0.450279	0.689575	0.411954	0.230925	0.412341	0.267302	0.622957	0.527535	0.460634	0.581289	0.386994	0.563516	0.551563	0.509983	0.66801
0.689904	0.549027	0.589883	0.599014	0.476712	0.531296	0.47619	0.825764	0.646399	0.43125	0.576679	0.309238	0.306322	0.804923	0.730553	0.514331			0.732919	0.524792	0.466073	0.389404	0.251738	0.394952	0.304729	0.613532	0.461533	0.366546	0.596755	0.40883	0.580115	0.546366	0.603938	0.579553
0.884385	0.504696	0.637146	0.5695	0.441898	0.575767	0.449414	0.787883	0.61427	0.429369	0.747379	0.417134	0.345091	0.668967	0.603094	0.519794			0.560158	0.639087	0.442695	0.464611	0.257564	0.375445	0.329937	0.596524	0.491862	0.386342	0.524099	0.44053	0.410784	0.643343	0.541835	0.530491
0.79993	0.564838	0.618167	0.509299	0.606961	0.447057	0.698638	0.73297	0.613314	0.478659	0.747735	0.503312	0.379347	0.690966	0.597564	0.487419			0.664812	0.598386	0.535921	0.450699	0.558419	0.364608	0.384767	0.522947	0.606345	0.395722	0.530399	0.56719	0.335547	0.552855	0.518974	0.405443
0.767701	0.57004	0.636214	0.521661	0.720225	0.504531	0.707966	0.737756	0.769209	0.500852	0.741472	0.281641	0.437827	0.712642	0.683108	0.538779			0.727943	0.558303	0.557331	0.454843	0.421427	0.338107	0.337055	0.622107	0.510581	0.416838	0.597117	0.288206	0.424803	0.559087	0.558043	0.416127
0.668262	0.667434	0.602838	0.566833	0.63363	0.451442	0.892484	0.669034	0.69104	0.510999	0.58417	0.389584	0.53832	0.643862	0.681967	0.51787			0.734241	0.430537	0.598395	0.368168	0.37728	0.328302	0.385417	0.514017	0.587117	0.393919	0.597833	0.468437	0.399609	0.575083	0.561812	0.375894
0.870398	0.417117	0.546809	0.543829	0.424058	0.352798	0.678504	0.626069	0.628649	0.36179	0.596555	0.444992	0.50541	0.723561	0.776368	0.538765			0.5243	0.457709	0.455912	0.402643	0.472024	0.318396	0.308461	0.512452	0.501501	0.336184	0.397303	0.424809	0.459276	0.615257	0.628832	0.293424
0.735023	0.499638	0.523555	0.606735	0.415016	0.463268	0.697385	0.531407	0.604679	0.316517	0.714034	0.396101	0.57769	0.66274	0.734394	0.599911			0.623629	0.329487	0.472441	0.413784	0.33013	0.31341	0.344324	0.519049	0.531061	0.360849	0.525505	0.381234	0.529468	0.68467	0.558274	0.260442
0.689729	0.633452	0.544989	0.669184	0.593042	0.301546	0.622368	0.526274	0.639207	0.46224	0.537049	0.23556	0.379678	0.715051	0.69468	0.804314			0.657709	0.225325	0.489696	0.391086	0.346062	0.246696	0.309116	0.374376	0.536839	0.369126	0.54741	0.335335	0.449758	0.57553	0.589335	0.274357
0.602183	0.526	0.500493	0.520948	0.773455	0.335454	0.521104	0.447838	0.570464	0.50976	0.505551	0.358838	0.319997	0.699532	0.651076	0.557562			0.507465	0.327185	0.516671	0.47453	0.33733	0.268977	0.310015	0.49067	0.596553	0.401765	0.454936	0.407243	0.414609	0.530265	0.529414	0.309152
0.706921	0.537877	0.547126	0.554849	0.494323	0.352689	0.382817	0.526679	0.591457	0.553072	0.477853	0.36892	0.301837	0.674599	0.713144	0.464314			0.508258	0.332568	0.426434	0.382087	0.336087	0.244289	0.32314	0.399399	0.608702	0.359671	0.415712	0.393607	0.387476	0.547795	0.502025	0.323698
0.728104	0.48326	0.541197	0.533437	0.594538	0.376395	0.387147	0.557315	0.773939	0.319484	0.458156	0.473839	0.32116	0.690053	0.743714	0.432435			0.502055	0.38958	0.320698	0.430941	0.560685	0.286489	0.314621	0.467702	0.528111	0.378719	0.416748	0.45659	0.372973	0.560266	0.522246	0.316364
0.751891	0.452955	0.485328	0.602055	0.3843	0.357937	0.498776	0.581589	0.712441	0.28838	0.480496	0.332665	0.328699	0.657114	0.572801	0.716134			0.370885	0.451248	0.410731	0.463547	0.412423	0.316797	0.569256	0.459891	0.466681	0.26228	0.430438	0.44428	0.30718	0.541107	0.505458	0.384868
0.665319	0.419085	0.409699	0.577419	0.479103	0.391966	0.443497	0.475044	0.637997	0.32815	0.53001	0.362085	0.363465	0.575003	0.762944	0.480473			0.374549	0.509833	0.534204	0.43629	0.388992	0.375608	0.447602	0.401088	0.479628	0.269953	0.356739	0.409889	0.27961	0.533646	0.45449	0.336645
0.653221	0.733684	0.45219	0.32207	0.335104	0.350812	0.441957	0.489526	0.642787	0.278564	0.533841	0.338826	0.348127	0.732007	0.600416	0.483144			0.447013	0.628615	0.360677	0.368371	0.391139	0.434501	0.314947	0.410275	0.536327	0.181293	0.35684	0.272332	0.29535	0.580104	0.486962	0.404004
0.675383	0.577603	0.520725	0.349927	0.38614	0.434376	0.443838	0.681591	0.559323	0.355285	0.398975	0.294444	0.377754	0.577333	0.593172	0.463578			0.412251	0.591106	0.406689	0.409378	0.413262	0.443699	0.296689	0.371351	0.474628	0.219135	0.394216	0.420944	0.299373	0.536252	0.435464	0.333551
0.598418	0.382843	0.468312	0.430085	0.318341	0.411681	0.432364	0.700086	0.503804	0.321677	0.489198	0.291357	0.369587	0.52775	0.57345	0.476523			0.336937	0.558221	0.35993	0.345124	0.290612	0.371295	0.268115	0.45027	0.486077	0.171331	0.31837	0.35188	0.279014	0.509606	0.452603	0.314171
0.643641	0.489759	0.456867	0.412294	0.315271	0.398527	0.562016	0.629375	0.483852	0.353463	0.469258	0.345235	0.316765	0.502401	0.702582	0.496051			0.353932	0.48701	0.447163	0.255197	0.310758	0.366473	0.291907	0.408884	0.486121	0.141054	0.393234	0.418398	0.393139	0.58565	0.323231	0.378789
0.511941	0.434859	0.472795	0.417185	0.325367	0.318675	0.653357	0.503438	0.639833	0.677826	0.541624	0.417361	0.33285	0.543991	0.731717	0.48805			0.369879	0.70686	0.421269	0.341617	0.44958	0.312428	0.301742	0.41426	0.543407	0.173078	0.390937	0.348005	0.310981	0.501149	0.375418	0.318014
0.626188	0.503746	0.530827	0.408306	0.353444	0.417218	0.604658	0.55083	0.571749	0.409148	0.444236	0.285287	0.298088	0.48442	0.568342	0.488449			0.699437	0.637337	0.392639	0.527449	0.377835	0.281963	0.361859	0.532403	0.540722	0.163002	0.326026	0.375892	0.296757	0.601851	0.385054	0.318461
0.48787	0.455545	0.492986	0.416072	0.358814	0.306005	0.54198	0.548733	0.588082	0.330529	0.519446	0.248837	0.36312	0.452762	0.50921	0.524318			0.541756	0.349162	0.411553	0.338317	0.384801	0.229764	0.310622	0.520463	0.493551	0.175588	0.386813	0.369579	0.38771	0.537319	0.399398	0.408037
0.600747	0.463665	0.586197	0.391562	0.342993	0.465347	0.433095	0.639037	0.50089	0.305083	0.689068	0.226645	0.408836	0.524615	0.539652	0.474568			0.419759	0.439649	0.38351	0.304587	0.445209	0.287722	0.314042	0.438212	0.523339	0.15774	0.500666	0.398561	0.38392	0.526328	0.367511	0.482879
0.44536	0.423682	0.537269	0.454882	0.352731	0.362507	0.436344	0.552759	0.484212	0.270878	0.482006	0.280002	0.492852	0.513042	0.47966	0.612631			0.331512	0.439485	0.419129	0.334566	0.410999	0.245846	0.320118	0.42761	0.424718	0.156104	0.416096	0.368038	0.251164	0.566626	0.411569	0.421988
0.451246	0.47538	0.48992	0.427939	0.379879	0.362922	0.401404	0.471552	0.466472	0.308547	0.42774	0.265121	0.335087	0.396769	0.450864	0.476504			0.441681	0.522121	0.371964	0.410902	0.341947	0.273624	0.310787	0.384604	0.422409	0.202624	0.283538	0.370106	0.294733	0.51291	0.455654	0.326634
0.523891	0.590698	0.550209	0.466812	0.368875	0.396296	0.352206	0.523993	0.469555	0.314272	0.404184	0.473159	0.409583	0.413462	0.451041	0.546712			0.319239	0.492869	0.339264	0.292035	0.31135	0.312338	0.310435	0.406253	0.389626	0.233382	0.301775	0.349171	0.27043	0.421283	0.391029	0.264587
0.440313	0.522516	0.410477	0.416045	0.390391	0.372715	0.417396	0.599848	0.4892	0.320538	0.518568	0.242756	0.48874	0.678169	0.60382	0.477848			0.452558	0.342793	0.655577	0.2947	0.271396	0.286672	0.669843	0.376996	0.287247	0.131422	0.379865	0.435316	0.342218	0.411822	0.433238	0.309509
0.490537	0.496675	0.485038	0.442106	0.37103	0.430236	0.431547	0.465637	0.537239	0.300247	0.442893	0.373753	0.509055	0.512202	0.535928	0.508203			0.544573	0.366224	0.467302	0.345528	0.289253	0.366865	0.617814	0.472495	0.240964	0.145487	0.359148	0.433609	0.362352	0.478441	0.391883	0.325966
0.486594	0.615928	0.580401	0.47932	0.427109	0.376985	0.423378	0.498234	0.433031	0.332809	0.438138	0.360501	0.53504	0.499681	0.49571	0.461322			0.364758	0.390364	0.333442	0.324477	0.383736	0.255001	0.451846	0.462086	0.309164	0.182131	0.39517	0.344518	0.451896	0.520076	0.46273	0.379268
0.468823	0.72408	0.402653	0.477137	0.55359	0.4845	0.486938	0.481567	0.477905	0.41172	0.498212	0.28076	0.492522	0.510248	0.541964	0.49337			0.344507	0.294782	0.311919	0.39347	0.31884	0.23936	0.368098	0.404494	0.336961	0.141497	0.327227	0.335917	0.265585	0.396533	0.533038	0.336406
0.642122	0.587851	0.418013	0.40217	0.471537	0.549712	0.563589	0.668971	0.490055	0.473859	0.47264	0.283689	0.495204	0.530749	0.462216	0.474934			0.392748	0.225402	0.358527	0.241251	0.304956	0.279213	0.311654	0.436647	0.328576	0.141899	0.266826	0.279671	0.383588	0.401384	0.606588	0.30177
0.447158	0.494805	0.47078	0.456747	0.433851	0.574545	0.628563	0.453667	0.417075	0.501462	0.47019	0.341731	0.40986	0.66058	0.497074	0.450065			0.383379	0.284342	0.326216	0.354185	0.208283	0.288988	0.275269	0.438559	0.333331	0.158979	0.381663	0.316066	0.351308	0.29118	0.48356	0.521609
0.563692	0.631362	0.456911	0.392319	0.565	0.452242	0.42472	0.425281	0.632274	0.562815	0.478327	0.353225	0.508927	0.61962	0.588251	0.450332			0.391297	0.316661	0.335136	0.389222	0.294143	0.3472	0.310605	0.347689	0.345768	0.218501	0.27945	0.25919	0.357998	0.319899	0.458236	0.33695
0.614527	0.476704	0.464724	0.504168	0.539984	0.399703	0.4877	0.49285	0.603486	0.498269	0.464619	0.289385	0.439585	0.752835	0.724741	0.431624			0.377266	0.355559	0.354882	0.427969	0.219504	0.260677	0.352165	0.381871	0.360933	0.269431	0.33734	0.338635	0.260185	0.366508	0.563093	0.240417
0.491545	0.565815	0.433104	0.502768	0.525956	0.469044	0.360731	0.547564	0.710596	0.47586	0.5558	0.392625	0.301554	0.712739	0.59866	0.460469			0.504061	0.341352	0.336133	0.330425	0.235803	0.300318	0.319827	0.405687	0.333908	0.126134	0.372667	0.277314	0.256832	0.325767	0.530703	0.27854
0.47373	0.523771	0.482139	0.570675	0.606541	0.52316	0.50443	0.527226	0.655309	0.499461	0.589906	0.241629	0.287911	0.623763	0.662515	0.492936			0.341515	0.346125	0.411768	0.321493	0.272142	0.273549	0.292103	0.420351	0.387332	0.146573	0.315699	0.305323	0.297701	0.459707	0.447141	0.4517
0.48746	0.60372	0.475345	0.501065	0.39861	0.463998	0.447082	0.495451	0.637764	0.474786	0.680438	0.271955	0.317327	0.602801	0.665782	0.569551			0.305614	0.303125	0.323697	0.327138	0.253216	0.303599	0.340513	0.329559	0.386829	0.150098	0.304403	0.31848	0.290093	0.388406	0.420305	0.408481
0.496258	0.611973	0.57028	0.361431	0.414813	0.385074	0.466182	0.439953	0.582081	0.358402	0.526246	0.546391	0.335862	0.637497	0.588224	0.476904			0.377694	0.338393	0.297406	0.364485	0.292693	0.217524	0.314233	0.48676	0.338837	0.137046	0.375051	0.238976	0.385791	0.390143	0.37432	0.303183
0.453987	0.4341	0.551892	0.388057	0.605722	0.407178	0.446881	0.657251	0.53567	0.296592	0.395779	0.385691	0.336148	0.640764	0.526493	0.439194			0.437259	0.335955	0.563738	0.367989	0.237475	0.418316	0.357203	0.451338	0.344377	0.17381	0.278968	0.24669	0.273933	0.364498	0.305214	0.364271
0.478457	0.592643	0.645122	0.565076	0.630182	0.389259	0.433746	0.789013	0.611166	0.275034	0.423041	0.268044	0.324997	0.595844	0.459002	0.590815			0.345216	0.481104	0.414107	0.353749	0.25491	0.42034	0.340178	0.327781	0.41364	0.217654	0.303745	0.274683	0.303795	0.377635	0.402741	0.318167
0.491334	0.521636	0.468848	0.351759	0.511962	0.309982	0.472146	0.789312	0.647438	0.306674	0.569715	0.486157	0.339172	0.67092	0.43099	0.723298			0.363924	0.548749	0.361025	0.277893	0.277028	0.457861	0.289837	0.489853	0.487035	0.288025	0.400371	0.255021	0.241048	0.385296	0.345368	0.286384
0.457213	0.503541	0.398846	0.419652	0.456624	0.306281	0.496382	0.738601	0.641394	0.349415	0.424661	0.391243	0.380312	0.624914	0.480044	0.488405			0.353495	0.486357	0.435189	0.270057	0.30292	0.377918	0.384238	0.506693	0.484727	0.130864	0.521548	0.27509	0.333528	0.411329	0.35234	0.356179
0.516213	0.413715	0.424901	0.336709	0.515815	0.33946	0.690652	0.660397	0.598098	0.282438	0.461042	0.491213	0.411181	0.491963	0.566129	0.459666			0.412518	0.303541	0.345912	0.391678	0.263199	0.373993	0.310959	0.604425	0.461917	0.185889	0.503234	0.31513	0.40739	0.297575	0.334601	0.380942
0.580312	0.398482	0.439102	0.403642	0.463413	0.445846	0.698663	0.763036	0.690447	0.296098	0.519124	0.333386	0.398433	0.644216	0.487709	0.497386			0.3678	0.27427	0.428645	0.258946	0.285877	0.412756	0.338691	0.522545	0.484421	0.170737	0.474028	0.226734	0.355669	0.34234	0.384212	0.348208
0.522225	0.487225	0.43592	0.417906	0.434707	0.350951	0.608693	0.64384	0.54641	0.343346	0.500153	0.409055	0.370198	0.675099	0.532831	0.503534			0.378409	0.340896	0.317676	0.266044	0.35359	0.354094	0.297413	0.613643	0.499844	0.144613	0.328444	0.252935	0.402233	0.374172	0.362538	0.236347
0.459978	0.477066	0.446328	0.494607	0.470663	0.325764	0.548682	0.700863	0.537651	0.306973	0.472618	0.369465	0.317441	0.65448	0.478527	0.388618			0.357271	0.390171	0.414964	0.307104	0.375281	0.325541	0.563099	0.525356	0.547524	0.14522	0.469422	0.244847	0.365693	0.313493	0.439773	0.340884
0.498222	0.430952	0.433791	0.391648	0.398495	0.342563	0.478765	0.599364	0.481882	0.277131	0.452353	0.394939	0.311144	0.518082	0.504681	0.419418			0.504178	0.347905	0.321115	0.31174	0.418501	0.378773	0.390456	0.434197	0.552656	0.218492	0.356442	0.284233	0.351679	0.278651	0.380448	0.423387
0.465562	0.415107	0.565082	0.397164	0.44778	0.309141	0.403972	0.70471	0.424672	0.271869	0.437512	0.204683	0.434634	0.471707	0.476793	0.440677			0.395846	0.353953	0.442074	0.334077	0.474237	0.42531	0.284224	0.513782	0.461227	0.132804	0.396908	0.244001	0.358285	0.364077	0.314814	0.475362

## Sheet: Figure 2D and E 4 and 24hr FI
14C																22C
0	0	0	0	0	0	0	0	0	0	0	0	0	0			0	0	0	0	0	0	0	0	0	0	0	0	0	0
0	0.04	0.271	0	0.13	0	0.12	0.053	0.077	0	0.2	0	0	0			0.03	0.02	0.065	0.017	0	0	0.019	0.05	0.007	0.044	0	0.011	0.004	0
0	0.062	0.337	0	0.26	0	0.147	0.081	0.123	0	0.2	0	0	0			0.049	0.02	0.13	0.017	0	0.14	0.019	0.074	0.007	0.068	0	0.011	0.026	0
0	0.062	0.337	0	0.391	0	0.147	0.081	0.123	0	0.2	0	0	0			0.049	0.02	0.182	0.017	0	0.14	0.019	0.143	0.007	0.068	0.057	0.011	0.026	0
0	0.062	0.337	0.004	0.521	0	0.147	0.081	0.123	0	0.2	0	0	0			0.049	0.02	0.182	0.017	0	0.14	0.019	0.198	0.007	0.068	0.057	0.011	0.026	0
0	0.062	0.337	0.063	0.643	0	0.147	0.081	0.123	0	0.2	0	0	0			0.049	0.02	0.182	0.017	0	0.14	0.019	0.198	0.007	0.068	0.057	0.011	0.026	0
0	0.062	0.337	0.117	0.643	0	0.147	0.081	0.123	0	0.2	0	0	0			0.049	0.02	0.182	0.017	0	0.14	0.019	0.198	0.007	0.068	0.057	0.011	0.026	0
0	0.062	0.337	0.117	0.643	0	0.147	0.081	0.123	0	0.2	0	0	0			0.049	0.02	0.182	0.017	0	0.14	0.019	0.198	0.007	0.068	0.057	0.011	0.026	0
0	0.062	0.337	0.117	0.643	0	0.147	0.081	0.123	0	0.2	0	0	0			0.049	0.02	0.182	0.017	0	0.14	0.019	0.198	0.007	0.068	0.057	0.011	0.026	0
0	0.062	0.337	0.117	0.643	0	0.147	0.081	0.123	0	0.2	0	0	0			0.049	0.02	0.182	0.017	0	0.14	0.019	0.198	0.007	0.068	0.057	0.011	0.026	0
0	0.062	0.337	0.117	0.643	0	0.147	0.081	0.123	0	0.2	0	0	0			0.049	0.02	0.182	0.017	0	0.14	0.055	0.198	0.007	0.068	0.057	0.011	0.026	0
0	0.062	0.337	0.117	0.643	0	0.147	0.081	0.123	0	0.2	0	0	0			0.049	0.02	0.182	0.017	0	0.14	0.055	0.198	0.007	0.068	0.057	0.011	0.026	0
0	0.062	0.337	0.117	0.643	0	0.147	0.081	0.123	0.089	0.2	0	0	0			0.049	0.02	0.182	0.017	0	0.14	0.055	0.198	0.007	0.068	0.057	0.011	0.026	0
0	0.112	0.337	0.117	0.643	0	0.147	0.081	0.125	0.108	0.2	0	0	0			0.049	0.02	0.182	0.017	0	0.14	0.055	0.198	0.007	0.068	0.057	0.011	0.026	0
0	0.116	0.337	0.117	0.643	0	0.147	0.081	0.131	0.108	0.2	0	0	0			0.049	0.02	0.182	0.017	0	0.14	0.055	0.198	0.007	0.068	0.057	0.011	0.026	0
0	0.116	0.337	0.117	0.705	0	0.147	0.081	0.131	0.108	0.2	0	0	0			0.049	0.02	0.182	0.017	0	0.14	0.055	0.198	0.007	0.068	0.057	0.011	0.079	0
0	0.116	0.347	0.117	0.784	0	0.158	0.081	0.131	0.108	0.2	0.062	0	0			0.049	0.02	0.182	0.017	0.001	0.14	0.055	0.198	0.007	0.068	0.057	0.011	0.088	0
0	0.116	0.361	0.117	0.865	0	0.165	0.081	0.131	0.108	0.2	0.083	0	0			0.049	0.02	0.182	0.017	0.001	0.14	0.055	0.198	0.007	0.1	0.057	0.011	0.088	0
0	0.116	0.361	0.117	0.865	0	0.174	0.081	0.131	0.108	0.2	0.083	0	0			0.049	0.02	0.182	0.017	0.001	0.14	0.055	0.198	0.007	0.133	0.057	0.011	0.088	0
0	0.116	0.361	0.117	0.865	0	0.174	0.081	0.131	0.108	0.2	0.083	0	0			0.049	0.02	0.232	0.017	0.001	0.14	0.055	0.198	0.007	0.133	0.057	0.011	0.088	0
0	0.116	0.361	0.117	0.865	0.009	0.174	0.081	0.131	0.108	0.254	0.083	0	0			0.049	0.02	0.256	0.017	0.001	0.14	0.055	0.198	0.007	0.133	0.057	0.011	0.088	0.031
0	0.116	0.361	0.117	0.865	0.009	0.174	0.091	0.131	0.108	0.32	0.083	0.017	0			0.049	0.02	0.256	0.018	0.001	0.14	0.055	0.198	0.007	0.133	0.073	0.011	0.088	0.031
0	0.116	0.361	0.117	0.865	0.009	0.174	0.091	0.131	0.108	0.344	0.083	0.077	0			0.049	0.02	0.256	0.024	0.001	0.14	0.055	0.198	0.007	0.133	0.086	0.011	0.088	0.031
0	0.116	0.361	0.117	0.865	0.009	0.174	0.091	0.148	0.108	0.344	0.083	0.126	0			0.049	0.02	0.256	0.024	0.001	0.14	0.055	0.198	0.007	0.133	0.086	0.011	0.088	0.031
0	0.116	0.361	0.117	0.865	0.009	0.174	0.091	0.219	0.108	0.344	0.083	0.126	0			0.049	0.02	0.256	0.024	0.001	0.14	0.055	0.198	0.007	0.133	0.086	0.011	0.088	0.031
0	0.116	0.361	0.139	0.865	0.009	0.174	0.091	0.219	0.108	0.344	0.083	0.126	0			0.049	0.02	0.256	0.024	0.001	0.14	0.055	0.198	0.007	0.133	0.086	0.011	0.103	0.031
0	0.116	0.361	0.194	0.865	0.009	0.174	0.091	0.219	0.108	0.344	0.083	0.126	0			0.049	0.02	0.256	0.024	0.001	0.14	0.055	0.198	0.01	0.133	0.086	0.011	0.262	0.031
0	0.116	0.361	0.251	0.865	0.009	0.174	0.091	0.219	0.108	0.344	0.099	0.126	0			0.05	0.02	0.256	0.024	0.001	0.14	0.055	0.198	0.01	0.133	0.086	0.029	0.296	0.031
0	0.116	0.361	0.303	0.865	0.009	0.174	0.091	0.219	0.108	0.344	0.104	0.126	0			0.05	0.02	0.256	0.024	0.001	0.14	0.055	0.198	0.01	0.133	0.086	0.029	0.296	0.031
0	0.116	0.361	0.358	0.865	0.017	0.174	0.091	0.219	0.108	0.344	0.104	0.126	0			0.05	0.02	0.256	0.024	0.001	0.14	0.055	0.198	0.01	0.133	0.086	0.029	0.296	0.031
0	0.116	0.361	0.413	0.865	0.05	0.174	0.091	0.219	0.108	0.344	0.104	0.126	0			0.05	0.02	0.256	0.024	0.001	0.14	0.055	0.198	0.01	0.133	0.086	0.029	0.296	0.031
0	0.116	0.361	0.413	0.865	0.083	0.185	0.091	0.219	0.119	0.344	0.104	0.126	0			0.05	0.02	0.256	0.024	0.001	0.14	0.055	0.213	0.01	0.133	0.086	0.029	0.296	0.031
0	0.116	0.361	0.413	0.865	0.089	0.185	0.091	0.219	0.142	0.344	0.104	0.126	0.004			0.05	0.02	0.256	0.024	0.001	0.14	0.055	0.317	0.01	0.133	0.086	0.029	0.296	0.031
0	0.116	0.361	0.413	0.865	0.089	0.185	0.091	0.219	0.166	0.344	0.104	0.126	0.004			0.05	0.02	0.256	0.024	0.001	0.14	0.055	0.337	0.01	0.133	0.086	0.029	0.296	0.031
0	0.116	0.361	0.413	0.865	0.089	0.185	0.091	0.219	0.178	0.344	0.104	0.126	0.004			0.05	0.02	0.256	0.024	0.001	0.14	0.055	0.337	0.01	0.133	0.086	0.029	0.296	0.031
0.063	0.116	0.361	0.413	0.889	0.089	0.185	0.091	0.219	0.178	0.344	0.104	0.126	0.004			0.05	0.02	0.256	0.024	0.001	0.14	0.055	0.337	0.01	0.133	0.086	0.029	0.296	0.031
0.15	0.116	0.361	0.413	0.921	0.089	0.185	0.091	0.219	0.181	0.344	0.104	0.126	0.004			0.05	0.02	0.256	0.024	0.001	0.14	0.055	0.337	0.01	0.133	0.086	0.029	0.296	0.031
0.169	0.116	0.361	0.413	0.926	0.089	0.185	0.091	0.219	0.182	0.344	0.104	0.126	0.004			0.05	0.02	0.283	0.024	0.001	0.14	0.055	0.337	0.01	0.133	0.086	0.029	0.296	0.031
0.169	0.116	0.361	0.413	0.926	0.089	0.185	0.091	0.219	0.182	0.344	0.104	0.126	0.004			0.05	0.02	0.341	0.024	0.021	0.158	0.055	0.337	0.01	0.133	0.086	0.029	0.296	0.031
0.169	0.116	0.424	0.413	0.926	0.089	0.185	0.091	0.219	0.182	0.344	0.104	0.138	0.004			0.05	0.02	0.398	0.024	0.092	0.217	0.055	0.337	0.01	0.133	0.086	0.029	0.296	0.076
0.169	0.116	0.462	0.413	0.926	0.089	0.185	0.091	0.219	0.182	0.403	0.139	0.175	0.004			0.05	0.02	0.455	0.024	0.163	0.217	0.055	0.337	0.01	0.133	0.086	0.029	0.375	0.094
0.169	0.124	0.462	0.413	0.926	0.089	0.185	0.091	0.219	0.182	0.475	0.205	0.179	0.004			0.07	0.02	0.47	0.024	0.228	0.217	0.055	0.337	0.01	0.133	0.102	0.029	0.391	0.094
0.169	0.234	0.462	0.413	0.926	0.089	0.185	0.091	0.262	0.182	0.505	0.205	0.179	0.004			0.089	0.02	0.47	0.024	0.228	0.217	0.055	0.337	0.01	0.172	0.168	0.029	0.391	0.094
0.169	0.323	0.462	0.413	0.926	0.089	0.185	0.091	0.343	0.182	0.505	0.205	0.179	0.004			0.089	0.02	0.47	0.024	0.228	0.217	0.055	0.337	0.01	0.214	0.219	0.029	0.391	0.094
0.169	0.323	0.462	0.413	0.926	0.089	0.185	0.091	0.422	0.182	0.505	0.205	0.179	0.004			0.089	0.02	0.47	0.024	0.228	0.217	0.055	0.337	0.01	0.214	0.231	0.029	0.391	0.094
0.169	0.323	0.462	0.413	0.926	0.089	0.185	0.091	0.422	0.182	0.505	0.205	0.179	0.004			0.089	0.02	0.47	0.024	0.228	0.217	0.055	0.337	0.01	0.214	0.25	0.029	0.391	0.094
0.169	0.323	0.462	0.413	0.926	0.089	0.185	0.091	0.422	0.182	0.505	0.205	0.179	0.004			0.089	0.02	0.47	0.024	0.228	0.217	0.055	0.337	0.01	0.214	0.262	0.029	0.391	0.094
0.169	0.323	0.462	0.413	0.926	0.089	0.185	0.091	0.422	0.182	0.505	0.205	0.179	0.004			0.089	0.02	0.47	0.024	0.228	0.217	0.055	0.337	0.01	0.214	0.262	0.029	0.391	0.094
0.169	0.323	0.462	0.413	0.926	0.089	0.185	0.091	0.422	0.182	0.505	0.205	0.179	0.004			0.089	0.02	0.47	0.024	0.228	0.217	0.055	0.337	0.01	0.214	0.262	0.029	0.391	0.094
0.169	0.323	0.462	0.413	0.926	0.089	0.185	0.096	0.422	0.182	0.505	0.205	0.179	0.004			0.089	0.02	0.47	0.066	0.228	0.217	0.055	0.337	0.01	0.214	0.262	0.029	0.391	0.094
0.169	0.323	0.462	0.413	0.926	0.089	0.185	0.102	0.422	0.182	0.505	0.205	0.179	0.004			0.089	0.02	0.47	0.132	0.228	0.217	0.055	0.337	0.01	0.214	0.262	0.029	0.391	0.094
0.169	0.323	0.462	0.413	0.926	0.089	0.185	0.112	0.422	0.188	0.585	0.205	0.179	0.004			0.089	0.02	0.47	0.197	0.228	0.217	0.055	0.337	0.01	0.214	0.262	0.029	0.391	0.094
0.169	0.323	0.462	0.413	0.926	0.089	0.185	0.112	0.422	0.217	0.673	0.205	0.179	0.024			0.089	0.02	0.47	0.239	0.228	0.217	0.055	0.337	0.01	0.214	0.262	0.029	0.391	0.094
0.169	0.323	0.462	0.413	0.926	0.089	0.185	0.112	0.422	0.247	0.762	0.205	0.179	0.047			0.089	0.02	0.47	0.239	0.228	0.217	0.055	0.337	0.01	0.214	0.262	0.058	0.391	0.094
0.169	0.323	0.462	0.413	0.926	0.089	0.185	0.112	0.422	0.276	0.78	0.205	0.179	0.059			0.089	0.02	0.47	0.243	0.228	0.217	0.055	0.337	0.01	0.214	0.262	0.118	0.391	0.094
0.169	0.323	0.462	0.413	0.926	0.089	0.195	0.112	0.422	0.294	0.78	0.205	0.18	0.059			0.089	0.02	0.47	0.243	0.228	0.217	0.055	0.337	0.01	0.214	0.262	0.173	0.391	0.094
0.169	0.323	0.462	0.413	0.926	0.089	0.195	0.112	0.422	0.294	0.78	0.205	0.182	0.059			0.089	0.02	0.47	0.243	0.228	0.217	0.055	0.337	0.01	0.214	0.262	0.18	0.391	0.094
0.169	0.323	0.462	0.413	0.926	0.089	0.195	0.112	0.422	0.294	0.78	0.242	0.184	0.152			0.089	0.02	0.47	0.243	0.228	0.217	0.055	0.337	0.01	0.214	0.262	0.18	0.391	0.094
0.169	0.323	0.462	0.413	0.926	0.089	0.195	0.112	0.422	0.294	0.78	0.27	0.186	0.152			0.089	0.024	0.47	0.243	0.228	0.217	0.055	0.337	0.01	0.214	0.262	0.18	0.42	0.094
0.169	0.323	0.462	0.413	0.926	0.089	0.195	0.112	0.422	0.294	0.78	0.275	0.186	0.152			0.089	0.068	0.47	0.243	0.323	0.217	0.055	0.337	0.01	0.214	0.262	0.18	0.484	0.094
0.169	0.433	0.484	0.413	0.926	0.089	0.195	0.112	0.422	0.294	0.78	0.282	0.186	0.152			0.103	0.112	0.47	0.243	0.323	0.217	0.055	0.337	0.01	0.214	0.262	0.18	0.516	0.094
0.169	0.458	0.539	0.413	0.926	0.089	0.195	0.112	0.422	0.294	0.78	0.282	0.186	0.152			0.169	0.112	0.47	0.243	0.329	0.269	0.055	0.337	0.01	0.214	0.262	0.18	0.516	0.094
0.169	0.458	0.559	0.413	0.926	0.089	0.195	0.112	0.422	0.294	0.78	0.282	0.186	0.152			0.198	0.112	0.47	0.243	0.334	0.286	0.055	0.337	0.01	0.214	0.262	0.18	0.531	0.102
0.206	0.458	0.559	0.434	0.926	0.089	0.195	0.167	0.422	0.294	0.78	0.282	0.186	0.152			0.198	0.112	0.47	0.243	0.334	0.286	0.055	0.337	0.01	0.214	0.262	0.18	0.531	0.127
0.31	0.458	0.559	0.467	0.926	0.089	0.195	0.284	0.422	0.294	0.78	0.282	0.186	0.152			0.198	0.112	0.485	0.243	0.334	0.286	0.055	0.337	0.01	0.255	0.262	0.18	0.531	0.151
0.413	0.458	0.559	0.501	0.926	0.089	0.195	0.345	0.422	0.294	0.78	0.282	0.186	0.152			0.198	0.112	0.485	0.243	0.334	0.286	0.055	0.337	0.01	0.264	0.262	0.18	0.531	0.17
0.517	0.458	0.559	0.528	0.926	0.089	0.195	0.363	0.422	0.294	0.78	0.282	0.186	0.152			0.198	0.112	0.485	0.243	0.334	0.286	0.055	0.337	0.01	0.264	0.262	0.18	0.531	0.17
0.53	0.458	0.559	0.528	0.926	0.089	0.195	0.363	0.422	0.294	0.78	0.282	0.186	0.152			0.198	0.112	0.485	0.243	0.334	0.286	0.055	0.337	0.01	0.264	0.262	0.18	0.531	0.17
0.53	0.458	0.559	0.571	0.926	0.089	0.195	0.363	0.445	0.294	0.78	0.282	0.186	0.152			0.198	0.112	0.485	0.243	0.334	0.286	0.055	0.337	0.01	0.264	0.356	0.18	0.531	0.17
0.53	0.458	0.559	0.646	0.926	0.089	0.195	0.363	0.496	0.294	0.78	0.282	0.186	0.16			0.198	0.112	0.485	0.243	0.334	0.286	0.099	0.337	0.01	0.264	0.46	0.18	0.531	0.17
0.53	0.458	0.559	0.646	0.926	0.089	0.195	0.363	0.546	0.294	0.78	0.282	0.186	0.259			0.198	0.112	0.485	0.243	0.334	0.286	0.099	0.337	0.01	0.264	0.46	0.18	0.531	0.17
0.53	0.458	0.559	0.646	0.926	0.089	0.195	0.363	0.574	0.294	0.78	0.282	0.186	0.264			0.198	0.112	0.529	0.243	0.334	0.286	0.099	0.337	0.01	0.264	0.46	0.18	0.531	0.17
0.53	0.458	0.559	0.646	0.926	0.105	0.207	0.363	0.574	0.294	0.78	0.282	0.23	0.266			0.198	0.112	0.529	0.243	0.334	0.315	0.099	0.337	0.01	0.264	0.46	0.18	0.531	0.17
0.53	0.458	0.559	0.646	0.926	0.18	0.207	0.363	0.574	0.308	0.827	0.282	0.263	0.266			0.198	0.112	0.529	0.243	0.334	0.342	0.099	0.356	0.01	0.264	0.46	0.18	0.531	0.17
0.53	0.458	0.559	0.646	0.926	0.259	0.219	0.363	0.574	0.355	0.909	0.282	0.263	0.266			0.198	0.112	0.529	0.243	0.334	0.342	0.099	0.36	0.018	0.264	0.46	0.18	0.531	0.17
0.53	0.458	0.559	0.646	0.926	0.26	0.253	0.363	0.574	0.393	0.946	0.282	0.263	0.266			0.198	0.112	0.529	0.243	0.334	0.342	0.099	0.36	0.018	0.264	0.46	0.18	0.531	0.17
0.53	0.458	0.606	0.646	0.926	0.26	0.286	0.363	0.574	0.393	0.946	0.304	0.263	0.266			0.198	0.112	0.529	0.243	0.334	0.342	0.099	0.36	0.018	0.264	0.46	0.185	0.531	0.17
0.53	0.458	0.639	0.646	0.926	0.26	0.309	0.363	0.574	0.393	0.946	0.398	0.263	0.266			0.198	0.112	0.529	0.243	0.334	0.342	0.099	0.36	0.018	0.264	0.46	0.262	0.531	0.17
0.53	0.458	0.639	0.646	0.926	0.26	0.309	0.363	0.574	0.393	0.946	0.492	0.263	0.266			0.198	0.112	0.529	0.243	0.334	0.342	0.099	0.36	0.018	0.264	0.46	0.27	0.531	0.17
0.53	0.582	0.639	0.646	0.926	0.26	0.309	0.363	0.574	0.393	0.946	0.538	0.263	0.266			0.198	0.112	0.529	0.243	0.334	0.342	0.099	0.36	0.018	0.264	0.46	0.27	0.531	0.181
0.53	0.6	0.639	0.646	0.937	0.26	0.309	0.363	0.574	0.393	0.946	0.538	0.263	0.266			0.198	0.112	0.529	0.243	0.334	0.342	0.099	0.36	0.018	0.264	0.46	0.27	0.531	0.312
0.53	0.6	0.639	0.646	0.982	0.26	0.309	0.363	0.574	0.393	0.946	0.538	0.263	0.337			0.198	0.112	0.529	0.243	0.334	0.342	0.099	0.36	0.018	0.264	0.46	0.27	0.531	0.312
0.53	0.6	0.639	0.646	1.085	0.26	0.309	0.363	0.574	0.393	0.946	0.538	0.263	0.437			0.198	0.112	0.529	0.243	0.641	0.342	0.104	0.36	0.018	0.264	0.46	0.27	0.531	0.312
0.53	0.6	0.639	0.646	1.187	0.26	0.309	0.363	0.574	0.393	0.96	0.538	0.263	0.437			0.198	0.112	0.529	0.243	0.957	0.342	0.104	0.36	0.018	0.264	0.46	0.27	0.552	0.312
0.554	0.6	0.639	0.646	1.231	0.26	0.309	0.363	0.642	0.393	1.067	0.538	0.294	0.437			0.198	0.112	0.529	0.243	1.104	0.342	0.104	0.36	0.018	0.264	0.46	0.27	0.589	0.312
1.137	0.6	0.639	0.646	1.231	0.38	0.309	0.363	0.748	0.393	1.095	0.538	0.356	0.437			0.198	0.159	0.529	0.243	1.111	0.342	0.104	0.36	0.018	0.264	0.462	0.27	0.589	0.312
1.425	0.6	0.639	0.646	1.231	0.509	0.309	0.378	0.764	0.393	1.095	0.538	0.415	0.437			0.198	0.226	0.529	0.243	1.111	0.342	0.139	0.36	0.018	0.264	0.462	0.27	0.589	0.312
1.425	0.6	0.639	0.646	1.231	0.581	0.309	0.465	0.764	0.393	1.095	0.538	0.415	0.437			0.288	0.226	0.529	0.243	1.111	0.342	0.155	0.36	0.018	0.298	0.462	0.27	0.627	0.312
1.425	0.6	0.639	0.646	1.231	0.581	0.309	0.512	0.764	0.393	1.095	0.538	0.415	0.568			0.386	0.226	0.553	0.243	1.111	0.342	0.155	0.36	0.018	0.338	0.462	0.27	0.627	0.312
1.425	0.6	0.639	0.686	1.231	0.581	0.309	0.512	0.764	0.393	1.095	0.538	0.415	0.569			0.445	0.226	0.578	0.243	1.111	0.342	0.159	0.36	0.018	0.348	0.462	0.27	0.627	0.312
1.425	0.6	0.639	0.75	1.231	0.581	0.309	0.512	0.764	0.426	1.095	0.538	0.415	0.569			0.445	0.226	0.586	0.243	1.111	0.342	0.164	0.36	0.018	0.348	0.464	0.27	0.627	0.312
1.425	0.6	0.764	0.814	1.231	0.581	0.309	0.512	0.764	0.486	1.095	0.574	0.415	0.569			0.445	0.226	0.634	0.243	1.111	0.363	0.164	0.36	0.018	0.348	0.464	0.27	0.627	0.312
1.425	0.6	0.902	0.878	1.231	0.581	0.32	0.512	0.764	0.501	1.095	0.669	0.415	0.569			0.445	0.226	0.698	0.323	1.111	0.475	0.164	0.36	0.094	0.417	0.464	0.361	0.627	0.312
1.425	0.626	0.903	0.934	1.231	0.581	0.459	0.512	0.764	0.504	1.095	0.749	0.415	0.601			0.445	0.226	0.752	0.413	1.111	0.588	0.164	0.36	0.134	0.472	0.464	0.465	0.627	0.312
1.425	0.772	0.903	0.934	1.231	0.581	0.598	0.512	0.764	0.504	1.095	0.749	0.415	0.642			0.445	0.226	0.752	0.503	1.111	0.612	0.164	0.36	0.134	0.472	0.467	0.553	0.627	0.316
1.425	0.841	0.903	0.934	1.231	0.581	0.629	0.512	0.788	0.504	1.095	0.749	0.415	0.683			0.445	0.226	0.752	0.594	1.111	0.612	0.164	0.36	0.134	0.472	0.56	0.553	0.627	0.389
1.425	0.841	0.903	0.934	1.233	0.581	0.629	0.512	0.882	0.504	1.152	0.749	0.438	0.705			0.445	0.226	0.752	0.684	1.111	0.612	0.164	0.36	0.134	0.472	0.631	0.553	0.629	0.401
1.425	0.841	0.903	0.934	1.333	0.581	0.629	0.512	0.953	0.504	1.255	0.749	0.605	0.705			0.445	0.226	0.752	0.725	1.111	0.612	0.164	0.381	0.134	0.472	0.631	0.553	0.695	0.401
1.425	0.841	0.903	0.934	1.433	0.581	0.629	0.512	0.953	0.504	1.255	0.749	0.63	0.705			0.445	0.226	0.752	0.728	1.111	0.612	0.164	0.467	0.134	0.472	0.631	0.553	0.701	0.401
1.425	0.841	0.903	0.934	1.456	0.581	0.629	0.607	0.953	0.504	1.255	0.749	0.63	0.705			0.445	0.226	0.752	0.728	1.111	0.612	0.164	0.544	0.134	0.472	0.631	0.553	0.701	0.405
1.425	0.841	0.903	0.934	1.456	0.711	0.629	0.722	0.953	0.504	1.255	0.749	0.63	0.705			0.445	0.226	0.752	0.728	1.111	0.612	0.164	0.545	0.134	0.472	0.631	0.553	0.701	0.412
1.425	0.841	0.903	0.934	1.475	0.781	0.629	0.82	0.953	0.504	1.255	0.749	0.63	0.705			0.445	0.226	0.752	0.728	1.111	0.612	0.164	0.545	0.134	0.472	0.631	0.553	0.701	0.412
1.428	0.841	0.903	0.934	1.576	0.781	0.629	0.82	0.953	0.531	1.255	0.8	0.63	0.706			0.445	0.226	0.752	0.728	1.114	0.612	0.164	0.545	0.137	0.472	0.631	0.553	0.701	0.412
1.428	0.841	1.011	0.934	1.61	0.781	0.629	0.82	0.953	0.591	1.255	0.893	0.63	0.758			0.445	0.226	0.752	0.728	1.114	0.612	0.164	0.545	0.197	0.472	0.631	0.553	0.701	0.412
1.428	0.841	1.026	1.076	1.61	0.781	0.629	0.82	0.953	0.645	1.255	0.942	0.63	0.816			0.445	0.226	0.752	0.728	1.12	0.612	0.199	0.545	0.197	0.472	0.631	0.553	0.701	0.412
1.428	0.841	1.026	1.551	1.61	0.781	0.629	0.82	0.953	0.645	1.255	0.942	0.63	0.816			0.445	0.226	0.752	0.728	1.123	0.612	0.253	0.545	0.197	0.472	0.631	0.553	0.701	0.477
1.428	0.841	1.026	1.551	1.61	0.781	0.629	0.82	0.954	0.645	1.319	0.942	0.63	0.816			0.445	0.226	0.752	0.728	1.123	0.612	0.304	0.545	0.197	0.472	0.631	0.553	0.701	0.582
1.428	0.841	1.026	1.551	1.61	0.781	0.629	0.82	1.046	0.645	1.411	0.942	0.647	0.871			0.445	0.226	0.752	0.728	1.123	0.63	0.304	0.545	0.197	0.472	0.631	0.553	0.701	0.582
1.428	0.935	1.026	1.551	1.61	0.781	0.629	0.82	1.139	0.645	1.429	0.942	0.687	0.931			0.445	0.298	0.752	0.728	1.123	0.686	0.304	0.545	0.197	0.57	0.656	0.553	0.701	0.582
1.428	1.069	1.131	1.558	1.61	0.781	0.629	0.82	1.161	0.645	1.429	0.942	0.694	0.931			0.503	0.381	0.752	0.728	1.123	0.743	0.304	0.545	0.197	0.593	0.721	0.553	0.719	0.582
1.428	1.101	1.247	1.566	1.61	0.797	0.629	0.82	1.161	0.645	1.429	0.942	0.694	0.931			0.572	0.387	0.752	0.728	1.123	0.8	0.304	0.545	0.197	0.593	0.77	0.553	0.793	0.582
1.428	1.101	1.247	1.567	1.61	0.918	0.629	0.82	1.161	0.645	1.429	0.942	0.694	0.931			0.572	0.387	0.752	0.728	1.123	0.857	0.304	0.545	0.258	0.593	0.77	0.563	0.848	0.582
1.428	1.101	1.247	1.567	1.61	1.032	0.654	0.857	1.161	0.645	1.429	0.942	0.704	0.931			0.572	0.387	0.752	0.728	1.123	0.891	0.304	0.545	0.346	0.593	0.77	0.632	0.848	0.582
1.428	1.101	1.247	1.571	1.634	1.032	0.764	0.951	1.161	0.645	1.429	0.995	0.768	1.007			0.572	0.387	0.752	0.728	1.123	0.891	0.304	0.545	0.346	0.593	0.77	0.701	0.848	0.582
1.428	1.101	1.247	1.578	1.726	1.032	0.878	0.951	1.161	0.645	1.429	1.103	0.768	1.042			0.572	0.387	0.848	0.728	1.123	0.891	0.304	0.545	0.346	0.593	0.77	0.759	0.848	0.592
1.428	1.101	1.247	1.583	1.772	1.032	0.878	0.951	1.163	0.645	1.519	1.155	0.768	1.042			0.572	0.387	0.96	0.728	1.123	0.891	0.304	0.586	0.346	0.593	0.77	0.759	0.848	0.713
1.428	1.221	1.247	1.583	1.772	1.032	0.878	0.951	1.25	0.655	1.65	1.155	0.768	1.042			0.572	0.387	0.96	0.738	1.123	0.891	0.304	0.698	0.346	0.593	0.77	0.759	0.848	0.713
1.428	1.317	1.247	1.583	1.772	1.032	0.878	1.016	1.337	0.688	1.65	1.155	0.768	1.042			0.572	0.387	0.96	0.844	1.123	0.891	0.304	0.698	0.346	0.593	0.77	0.759	0.848	0.713
1.428	1.317	1.247	1.583	1.772	1.036	0.878	1.134	1.419	0.688	1.65	1.155	0.768	1.085			0.572	0.387	0.96	0.951	1.123	0.891	0.304	0.698	0.346	0.593	0.77	0.759	0.848	0.713
1.428	1.317	1.301	1.583	1.772	1.189	0.878	1.253	1.419	0.688	1.65	1.155	0.798	1.135			0.572	0.387	0.96	0.976	1.123	0.891	0.304	0.698	0.346	0.593	0.776	0.759	0.848	0.732
1.428	1.317	1.351	1.583	1.772	1.247	0.878	1.297	1.419	0.688	1.65	1.279	0.813	1.178			0.572	0.387	0.96	0.976	1.123	0.891	0.304	0.698	0.346	0.598	0.864	0.759	0.848	0.754
1.428	1.317	1.351	1.583	1.772	1.247	0.878	1.297	1.419	0.688	1.65	1.415	0.813	1.178			0.572	0.389	0.96	0.976	1.13	0.891	0.39	0.698	0.346	0.598	0.893	0.759	0.848	0.754
1.428	1.358	1.351	1.583	1.839	1.247	1.01	1.297	1.419	0.73	1.755	1.442	0.813	1.178			0.753	0.394	0.96	0.976	1.145	0.891	0.495	0.698	0.346	0.677	0.893	0.759	0.848	0.754
1.428	1.373	1.351	1.593	1.948	1.247	1.119	1.297	1.419	0.804	1.755	1.442	0.813	1.178			0.848	0.398	0.96	0.976	1.151	0.953	0.495	0.698	0.346	0.695	0.893	1.22	0.965	0.76
1.428	1.373	1.351	1.628	2.052	1.382	1.119	1.297	1.43	0.865	1.757	1.442	0.831	1.178			0.848	0.403	0.96	0.976	1.151	1.072	0.495	0.698	0.346	0.695	0.893	1.489	1.063	0.88
1.428	1.373	1.415	1.664	2.052	1.444	1.119	1.297	1.544	0.865	1.788	1.442	0.915	1.318			0.848	0.403	0.96	0.976	1.151	1.102	0.495	0.698	0.389	0.695	0.893	1.489	1.063	0.88
1.457	1.373	1.473	1.7	2.052	1.444	1.119	1.297	1.629	0.865	1.82	1.442	0.915	1.318			0.848	0.403	0.96	0.976	1.151	1.102	0.495	0.698	0.457	0.695	0.893	1.49	1.063	0.88
1.464	1.373	1.473	1.736	2.052	1.444	1.119	1.297	1.629	0.865	1.851	1.442	0.915	1.318			0.848	0.403	0.96	0.977	1.151	1.102	0.495	0.777	0.457	0.827	0.893	1.505	1.063	0.88
1.464	1.373	1.473	1.771	2.052	1.545	1.119	1.297	1.629	0.865	1.851	1.534	0.922	1.398			0.848	0.403	0.96	1.028	1.151	1.102	0.495	0.9	0.457	0.83	0.893	1.507	1.063	0.88
1.464	1.378	1.473	1.792	2.052	1.598	1.119	1.297	1.629	0.865	1.851	1.646	1.001	1.398			0.878	0.403	1.011	1.079	1.151	1.102	0.495	0.931	0.457	0.83	0.893	1.507	1.115	0.922
1.464	1.446	1.473	1.792	2.056	1.598	1.18	1.297	1.629	0.883	2.446	1.646	1.015	1.398			0.952	0.403	1.052	1.131	1.244	1.105	0.495	0.931	0.457	0.83	0.893	1.507	1.182	0.97
1.51	1.513	1.525	1.854	2.156	1.598	1.244	1.297	1.657	0.912	2.446	1.646	1.089	1.438			0.975	0.403	1.052	1.158	1.244	1.162	0.599	0.931	0.501	0.83	0.902	1.507	1.182	0.97
1.64	1.543	1.604	1.929	2.258	1.598	1.308	1.39	1.702	0.942	2.448	1.646	1.12	1.482			0.975	0.411	1.052	1.159	1.244	1.218	0.606	0.931	0.592	0.83	0.902	1.507	1.192	0.97
1.642	1.543	1.684	1.969	2.258	1.598	1.372	1.483	1.744	0.962	2.448	1.646	1.12	1.492			0.975	0.456	1.124	1.159	1.34	1.274	0.648	0.931	0.592	0.837	0.934	1.508	1.206	0.986
1.642	1.543	1.684	1.969	2.389	1.703	1.391	1.572	1.744	0.962	2.448	1.735	1.16	1.516			1.036	0.499	1.173	1.159	1.444	1.301	0.691	0.931	0.592	0.854	1.002	1.508	1.208	1.011
1.642	1.543	1.742	1.969	2.423	1.833	1.403	1.572	1.744	1.002	2.448	1.886	1.193	1.539			1.072	0.543	1.173	1.159	1.469	1.301	0.733	0.957	0.592	0.871	1.037	1.508	1.208	1.035
1.728	1.547	1.859	1.969	2.447	1.963	1.465	1.572	1.774	1.062	2.448	2.038	1.26	1.562			1.072	0.556	1.173	1.167	1.476	1.342	0.768	0.994	0.592	0.888	1.037	1.508	1.257	1.057
1.832	1.6	1.859	1.969	2.49	2.093	1.527	1.585	1.818	1.089	2.448	2.189	1.329	1.586			1.072	0.573	1.173	1.222	1.487	1.422	0.768	1.031	0.592	0.905	1.082	1.512	1.319	1.081
1.937	1.654	1.859	2.038	2.51	2.181	1.549	1.637	1.831	1.118	2.448	2.341	1.399	1.609			1.072	0.721	1.173	1.277	1.506	1.503	0.768	1.051	0.592	0.921	1.132	1.516	1.367	1.122
1.953	1.707	1.859	2.111	2.553	2.181	1.632	1.688	1.987	1.164	2.448	2.482	1.415	1.632			1.102	0.756	1.173	1.332	1.524	1.579	0.778	1.053	0.832	0.921	1.182	1.521	1.367	1.129
1.953	1.76	1.959	2.185	2.568	2.258	1.652	1.715	2.23	1.174	2.448	2.482	1.469	1.681			1.131	0.756	1.213	1.388	1.543	1.579	0.799	1.126	0.872	0.942	1.232	1.525	1.408	1.146
1.954	1.788	1.962	2.259	2.6	2.277	1.652	1.812	2.23	1.174	2.448	2.485	1.491	1.731			1.15	0.781	1.258	1.445	1.561	1.579	0.821	1.202	0.885	0.965	1.281	1.529	1.476	1.162
1.955	1.809	1.972	2.332	2.632	2.294	1.652	1.936	2.23	1.237	2.448	2.485	1.491	1.78			1.157	0.859	1.304	1.475	1.58	1.594	0.843	1.281	1.081	0.987	1.332	1.529	1.49	1.178
1.955	1.832	1.973	2.406	2.664	2.3	1.675	1.959	2.23	1.303	2.448	2.485	2.087	1.798			1.158	0.938	1.349	1.54	1.59	1.692	0.865	1.282	1.391	1.01	1.332	1.534	1.526	1.19
2.05	1.855	2.022	2.443	2.697	2.3	1.744	1.959	2.23	1.324	2.448	2.485	2.113	1.823			1.158	1.016	1.356	1.604	1.633	1.721	0.875	1.305	1.395	1.033	1.332	1.541	1.546	1.232
2.05	1.876	2.071	2.471	2.728	2.3	1.812	1.959	2.23	1.324	2.448	2.497	2.15	1.863			1.51	1.094	1.435	1.667	1.708	1.787	0.912	1.329	1.395	1.055	1.332	1.546	1.546	1.294
2.05	1.876	2.12	2.504	2.728	2.3	1.881	1.974	2.233	1.348	2.448	2.502	2.187	1.904			1.834	1.173	1.526	1.673	1.784	1.853	0.949	1.353	1.395	1.078	1.332	1.57	1.63	1.355
2.111	1.876	2.169	2.537	2.728	2.3	1.949	2.048	2.233	1.434	2.532	2.502	2.224	1.944			1.859	1.204	1.526	1.729	1.86	1.919	0.985	1.377	1.395	1.101	1.333	1.614	1.757	1.416
2.181	1.997	2.219	2.57	2.775	2.3	2.013	2.122	2.233	1.434	2.533	2.502	2.231	1.984			1.891	1.204	1.526	1.784	1.876	1.985	1.022	1.377	1.395	1.123	1.436	1.658	1.794	1.439
2.235	2.088	2.268	2.603	2.824	2.3	2.013	2.195	2.233	1.434	2.556	2.502	2.231	2.024			1.906	1.209	1.56	1.84	1.876	2.002	1.036	1.377	1.395	1.146	1.526	1.667	1.794	1.442
2.235	2.088	2.309	2.603	2.872	2.3	2.018	2.208	2.233	1.434	2.637	2.502	2.231	2.064			1.906	1.209	1.604	1.896	1.876	2.002	1.051	1.452	1.395	1.168	1.526	1.712	1.988	1.463
2.235	2.088	2.324	2.603	2.92	2.3	2.103	2.208	2.233	1.434	2.718	2.502	2.231	2.104			1.906	1.209	1.648	1.951	1.876	2.002	1.066	1.538	1.395	1.191	1.526	1.757	1.988	1.492
2.235	2.088	2.335	2.603	2.943	2.3	2.134	2.208	2.233	1.434	2.8	2.502	2.231	2.144			1.906	1.209	1.658	2.007	1.918	2.028	1.077	1.574	1.395	1.214	1.526	1.802	1.988	1.51
2.243	2.088	2.371	2.603	2.95	2.3	2.134	2.208	2.233	1.434	2.835	2.502	2.231	2.184			1.906	1.209	1.712	2.062	2.052	2.091	1.077	1.65	1.395	1.236	1.589	1.823	1.988	1.58
2.245	2.088	2.45	2.603	2.991	2.308	2.134	2.255	2.233	1.434	2.835	2.502	2.231	2.225			1.906	1.224	1.804	2.079	2.099	2.118	1.077	1.729	1.395	1.259	1.641	1.823	2.041	1.65
2.248	2.088	2.45	2.603	3.033	2.343	2.134	2.373	2.246	1.477	2.835	2.502	2.231	2.265			1.906	1.265	1.878	2.083	2.099	2.186	1.077	1.755	1.395	1.282	1.641	1.823	2.094	1.68
2.33	2.088	2.45	2.603	3.074	2.379	2.159	2.443	2.281	1.613	2.859	2.502	2.231	2.305			1.906	1.306	1.878	2.085	2.099	2.282	1.153	1.755	1.395	1.304	1.641	1.823	2.094	1.723
2.354	2.088	3.148	2.603	3.116	2.415	2.286	2.529	2.315	1.655	2.915	2.502	2.231	2.326			1.906	1.347	1.878	2.085	2.099	2.379	1.266	1.755	1.395	1.327	1.641	1.823	2.094	1.77
2.354	2.209	3.167	2.603	3.158	2.451	2.415	2.529	2.35	1.655	2.969	2.502	2.231	2.337			1.906	1.388	1.878	2.129	2.099	2.476	1.282	1.755	1.395	1.342	1.641	1.823	2.155	1.817
2.401	2.245	3.167	2.603	3.158	2.468	2.415	2.529	2.385	1.709	2.969	2.554	2.231	2.348			1.906	1.388	1.878	2.183	2.099	2.573	1.287	1.755	1.395	1.355	1.641	1.823	2.23	1.863
2.515	2.245	3.167	2.603	3.158	2.473	2.415	2.529	2.419	1.778	2.974	2.554	2.298	2.359			1.906	1.388	1.878	2.237	2.143	2.67	1.296	1.755	1.395	1.373	1.696	1.823	2.293	1.91
2.628	2.245	3.167	2.603	3.158	2.478	2.415	2.529	2.427	1.778	3.056	2.554	2.298	2.363			1.906	1.388	1.878	2.284	2.182	2.767	1.305	1.755	1.397	1.392	1.792	1.823	2.312	1.91
2.689	2.245	3.167	2.603	3.158	2.484	2.415	2.529	2.427	1.778	3.142	2.582	2.298	2.388			1.919	1.429	1.946	2.284	2.182	2.863	1.314	1.755	1.466	1.41	1.792	1.823	2.375	1.914
2.778	2.245	3.167	2.603	3.231	2.49	2.415	2.542	2.427	1.778	3.142	2.62	2.298	2.562			1.967	1.505	2.041	2.284	2.182	2.96	1.323	1.755	1.466	1.428	1.792	1.839	2.437	1.917
2.876	2.245	3.167	2.603	3.315	2.495	2.415	2.667	2.427	1.778	3.146	2.659	2.345	2.737			1.967	1.572	2.041	2.284	2.182	3.057	1.332	1.755	1.466	1.434	1.792	1.882	2.5	1.939
2.899	2.284	3.167	2.603	3.385	2.499	2.415	2.713	2.446	1.778	3.146	2.692	2.345	2.911			1.967	1.572	2.041	2.284	2.182	3.098	1.336	1.755	1.475	1.441	1.795	1.905	2.532	1.99
2.899	2.337	3.167	2.603	3.406	2.499	2.465	2.713	2.513	1.778	3.146	2.692	2.37	3.086			1.967	1.572	2.041	2.284	2.182	3.098	1.336	1.755	1.508	1.448	1.844	1.917	2.594	2.041
2.899	2.39	3.167	2.603	3.46	2.499	2.524	2.713	2.523	1.803	3.146	2.692	2.407	3.26			1.993	1.609	2.041	2.284	2.182	3.098	1.344	1.767	1.642	1.455	1.902	1.977	2.594	2.062
2.899	2.443	3.167	2.603	3.489	2.499	2.583	2.713	2.523	1.84	3.146	2.755	2.407	3.292			2.042	1.682	2.041	2.284	2.182	3.132	1.374	1.81	1.713	1.461	1.949	2.037	2.594	2.135
2.922	2.496	3.167	2.603	3.53	2.499	2.643	2.746	2.544	1.878	3.21	2.832	2.407	3.331			2.061	1.755	2.119	2.284	2.182	3.15	1.405	1.862	1.724	1.468	1.949	2.097	2.611	2.214
3.043	2.524	3.167	2.603	3.641	2.51	2.702	2.818	2.58	1.915	3.275	2.832	2.45	3.364			2.061	1.792	2.17	2.284	2.182	3.15	1.435	1.914	1.724	1.468	1.949	2.121	2.611	2.292
3.043	2.524	3.167	2.619	3.696	2.523	2.761	2.89	2.616	1.943	3.282	2.832	2.513	3.395			2.061	1.792	2.177	2.284	2.182	3.15	1.465	1.961	1.736	1.49	1.949	2.17	2.698	2.31
3.043	2.597	3.167	2.71	3.696	2.536	2.821	2.962	2.652	1.943	3.298	2.883	2.513	3.47			2.061	1.792	2.177	2.284	2.183	3.15	1.495	1.996	1.825	1.538	1.949	2.206	2.768	2.343
3.043	2.655	3.167	2.8	3.696	2.548	2.851	3.034	2.686	1.943	3.305	2.96	2.513	3.47			2.061	1.792	2.223	2.284	2.238	3.15	1.495	2.054	1.838	1.556	1.949	2.206	2.768	2.41
3.043	2.658	3.167	2.89	3.696	2.561	2.851	3.091	2.686	1.943	3.305	2.96	2.57	3.47			2.131	1.792	2.274	2.284	2.243	3.15	1.495	2.081	1.838	1.556	1.949	2.206	2.768	2.477
3.043	2.658	3.167	2.981	3.745	2.572	2.851	3.091	2.686	1.943	3.314	2.96	2.655	3.47			2.205	1.792	2.324	2.284	2.328	3.15	1.518	2.098	1.838	1.556	1.949	2.206	2.839	2.527
3.043	2.658	3.167	3.001	3.844	2.572	2.851	3.091	2.686	1.943	3.314	2.96	2.741	3.47			2.219	1.792	2.375	2.284	2.414	3.15	1.586	2.142	1.838	1.556	1.949	2.206	2.839	2.55
3.054	2.658	3.186	3.017	3.863	2.572	2.851	3.091	2.686	2.029	3.314	3.062	2.799	3.47			2.242	1.792	2.397	2.284	2.464	3.15	1.654	2.21	1.838	1.556	1.954	2.206	2.839	2.591
3.111	2.726	3.186	3.017	3.972	2.585	2.851	3.482	2.705	2.142	3.354	3.118	2.799	3.47			2.242	1.813	2.472	2.284	2.482	3.15	1.675	2.277	1.838	1.556	2.112	2.206	2.839	2.591
3.167	2.826	3.189	3.08	4.109	2.608	2.851	3.714	2.78	2.142	3.397	3.118	2.799	3.471			2.242	1.913	2.492	2.284	2.554	3.16	1.69	2.289	1.887	1.556	2.112	2.206	2.839	2.591
3.223	2.836	3.189	3.178	4.266	2.631	2.851	3.773	2.856	2.142	3.44	3.118	2.799	3.471			2.242	2.007	2.509	2.284	2.627	3.16	1.71	2.295	1.954	1.556	2.112	2.206	2.839	2.591
3.276	2.836	3.195	3.276	4.46	2.647	2.851	3.832	2.856	2.142	3.482	3.118	2.799	3.471			2.249	2.007	2.533	2.284	2.669	3.16	1.731	2.302	2.021	1.556	2.112	2.206	2.839	2.591
3.276	2.836	3.224	3.34	4.655	2.647	2.851	3.891	2.856	2.142	3.525	3.118	2.799	3.471			2.297	2.007	2.557	2.284	2.669	3.16	1.752	2.308	2.087	1.556	2.112	2.206	2.839	2.591
3.276	2.836	3.254	3.349	4.859	2.647	2.851	3.95	2.856	2.142	3.568	3.137	2.849	3.471			2.344	2.007	2.581	2.284	2.669	3.16	1.772	2.31	2.154	1.556	2.112	2.233	2.839	2.619
3.276	2.836	3.283	3.401	4.861	2.647	3.4	4.009	2.861	2.142	3.611	3.2	2.849	3.471			2.391	2.007	2.605	2.284	2.669	3.16	1.793	2.31	2.221	1.616	2.112	2.28	2.839	2.697
3.35	2.836	3.301	3.454	4.861	2.718	3.404	4.068	2.93	2.142	3.651	3.263	2.849	3.471			2.438	2.135	2.63	2.284	2.669	3.16	1.814	2.31	2.288	1.616	2.112	2.327	2.839	2.7
3.499	2.836	3.347	3.49	4.871	2.879	3.422	4.092	2.99	2.166	3.651	3.326	2.849	3.513			2.448	2.269	2.65	2.312	2.669	3.16	1.834	2.31	2.32	1.616	2.114	2.374	2.839	2.7
3.525	2.836	3.394	3.494	4.896	2.879	3.44	4.1	2.99	2.22	3.651	3.335	2.849	3.557			2.448	2.294	2.65	2.372	2.669	3.16	1.844	2.31	2.412	1.616	2.114	2.4	2.839	2.7
3.525	2.836	3.441	3.499	4.896	2.879	3.443	4.1	3.022	2.275	3.651	3.353	2.999	3.601			2.448	2.294	2.65	2.433	2.669	3.16	1.844	2.31	2.506	1.616	2.142	2.4	2.868	2.717
3.525	2.836	3.488	3.541	4.896	2.879	3.443	4.1	3.063	2.292	3.651	3.412	3.13	3.645			2.448	2.842	2.65	2.493	2.669	3.16	1.844	2.31	2.599	1.668	2.192	2.4	2.868	2.831
3.525	2.872	3.535	3.604	4.896	2.925	3.446	4.1	3.105	2.292	3.651	3.47	3.13	3.689			2.448	2.842	2.65	2.553	2.669	3.16	1.844	2.31	2.693	1.739	2.237	2.469	2.868	2.831
3.525	2.989	3.551	3.666	4.896	3.054	3.446	4.1	3.147	2.292	3.651	3.492	3.13	3.701			2.448	2.842	2.65	2.614	2.669	3.16	1.844	2.31	2.777	1.81	2.237	2.542	2.868	2.831
3.608	2.989	3.584	3.682	4.896	3.09	3.446	4.1	3.189	2.292	3.651	3.563	3.13	3.728			2.448	2.842	2.65	2.674	2.669	3.16	1.844	2.31	2.782	1.88	2.24	2.614	2.868	2.831
3.718	3.002	3.616	3.682	4.929	3.09	3.446	4.1	3.206	2.292	3.651	3.583	3.13	3.754			2.448	2.842	2.65	2.734	2.669	3.16	1.844	2.31	2.782	1.951	2.263	2.645	2.877	2.831
3.718	3.002	3.625	3.682	4.992	3.097	3.446	4.1	3.209	2.295	3.696	3.677	3.157	3.781			2.448	2.842	2.65	2.794	2.669	3.16	1.844	2.31	2.805	2.021	2.285	2.706	2.896	2.831
3.718	3.002	3.625	3.682	4.992	3.111	3.446	4.1	3.209	2.31	3.731	3.677	3.249	3.797			2.448	2.842	2.65	2.855	2.669	3.199	1.844	2.31	2.862	2.092	2.303	2.734	2.928	2.831
3.718	3.002	3.625	3.682	4.992	3.126	3.446	4.1	3.216	2.376	3.731	3.677	3.34	3.797			2.498	2.842	2.65	2.895	2.669	3.264	1.844	2.31	2.862	2.163	2.303	2.734	2.949	2.831
3.718	3.002	3.625	3.682	4.992	3.131	3.446	4.1	3.216	2.402	3.731	3.677	3.432	3.797			2.575	2.848	2.709	2.899	2.669	3.33	1.844	2.31	2.862	2.233	2.303	2.736	2.949	2.831
3.718	3.002	3.625	3.682	4.992	3.131	3.446	4.1	3.216	2.402	3.733	3.677	3.523	3.797			2.575	2.849	2.77	2.905	2.669	3.395	1.844	2.338	2.862	2.304	2.303	2.736	3.09	2.831
3.718	3.002	3.625	3.682	4.992	3.131	3.446	4.1	3.216	2.402	3.801	3.677	3.615	3.797			2.575	2.849	2.773	2.905	2.669	3.46	1.869	2.404	2.862	2.374	2.342	2.736	3.243	2.928
3.718	3.002	3.625	3.682	4.992	3.158	3.446	4.1	3.216	2.402	3.868	3.677	3.706	3.797			2.575	2.849	2.786	2.905	2.72	3.499	2.023	2.469	2.862	2.409	2.451	2.736	3.279	2.928
3.746	3.044	3.644	3.682	4.992	3.213	3.446	4.1	3.216	2.407	3.936	3.677	3.779	3.797			2.575	2.849	2.786	3.459	2.815	3.526	2.064	2.512	2.862	2.443	2.488	2.736	3.393	2.978
3.756	3.174	3.647	3.682	4.992	3.267	3.446	4.1	3.216	2.407	3.965	3.7	3.779	3.797			2.575	2.849	2.786	3.579	2.899	3.558	2.064	2.539	2.862	2.481	2.488	2.736	3.508	3.051
3.828	3.177	3.727	3.682	4.992	3.299	3.446	4.1	3.216	2.407	3.965	3.842	3.819	3.92			2.649	2.849	2.786	3.579	2.908	3.59	2.064	2.574	2.862	2.519	2.488	2.736	3.604	3.124
3.873	3.202	3.829	3.682	4.992	3.299	3.446	4.1	3.216	2.407	3.965	3.842	3.819	3.92			2.665	2.849	2.786	3.579	2.924	3.617	2.064	2.61	2.862	2.546	2.488	2.736	3.604	3.197
3.873	3.226	3.871	3.682	5.059	3.299	3.448	4.1	3.216	2.462	3.968	3.842	3.819	3.92			2.665	2.849	2.786	3.579	2.945	3.617	2.064	2.627	2.862	2.546	2.488	2.736	3.628	3.27
3.873	3.251	3.871	3.682	5.124	3.299	3.448	4.1	3.216	2.526	3.968	3.842	3.819	3.92			2.665	2.849	2.786	3.579	2.99	3.617	2.068	2.627	2.862	2.546	2.488	2.736	3.628	3.344
3.873	3.275	3.895	3.682	5.127	3.322	3.448	4.1	3.216	2.591	3.968	3.842	3.819	3.92			2.665	2.849	2.786	3.579	2.99	3.617	2.108	2.627	2.862	2.548	2.488	2.736	3.643	3.417
3.95	3.299	3.977	3.682	5.191	3.374	3.46	4.1	3.216	2.617	3.968	3.842	3.888	3.92			2.665	2.849	2.786	3.579	2.99	3.617	2.148	2.627	2.862	2.552	2.488	2.736	3.69	3.489
4.029	3.321	4.059	3.682	5.256	3.396	3.479	4.1	3.326	2.63	3.981	3.842	4.102	3.92			2.665	2.849	2.786	3.579	2.99	3.617	2.164	2.627	2.862	2.553	2.488	2.736	3.695	3.568
4.029	3.321	4.091	3.682	5.316	3.453	3.479	4.1	3.42	2.638	3.981	3.842	4.102	3.956			2.685	2.849	2.826	3.579	2.99	3.617	2.185	2.627	2.862	2.553	2.488	2.736	3.746	3.727
4.029	3.321	4.091	3.682	5.316	3.47	3.649	4.1	3.42	2.638	3.991	3.842	4.102	4.023			2.778	2.849	2.875	3.579	2.99	3.617	2.209	2.627	2.862	2.553	2.488	2.76	3.746	3.866
4.029	3.321	4.091	3.682	5.332	3.47	3.773	4.1	3.42	2.638	4.051	3.97	4.102	4.023			2.778	2.849	2.877	3.579	2.99	3.617	2.233	2.627	2.862	2.553	2.539	2.816	3.78	3.867
4.029	3.321	4.091	3.682	5.338	3.47	3.773	4.1	3.42	2.638	4.11	4.134	4.102	4.023			2.778	2.849	2.893	3.579	2.99	3.617	2.253	2.627	2.862	2.553	2.608	2.871	3.815	3.871
4.141	3.321	4.091	3.682	5.338	3.47	3.773	4.1	3.42	2.638	4.169	4.134	4.102	4.023			2.778	2.849	2.899	3.579	2.99	3.617	2.253	2.627	2.862	2.553	2.664	2.926	3.815	3.871
4.269	3.321	4.091	3.682	5.338	3.47	3.775	4.1	3.42	2.638	4.214	4.134	4.102	4.238			2.778	2.849	2.938	3.579	2.99	3.617	2.253	2.627	2.941	2.553	2.664	2.981	3.815	3.871
4.27	3.321	4.091	3.682	5.338	3.47	3.775	4.1	3.42	3.279	4.214	4.134	4.102	4.671			2.778	2.849	2.985	3.579	2.99	3.627	2.253	2.627	3.025	2.553	2.664	3.009	3.815	3.871
4.27	3.321	4.091	3.682	5.338	3.554	3.775	4.1	3.42	3.279	4.214	4.134	4.102	4.679			2.849	2.86	3.032	3.579	3.005	3.782	2.253	2.627	3.109	2.553	2.664	3.009	3.815	3.871
4.27	3.321	4.091	3.682	5.353	3.699	3.775	4.1	3.447	3.279	4.214	4.134	4.102	4.721			2.908	2.923	3.079	3.579	3.005	3.937	2.253	2.627	3.194	2.553	2.664	3.009	3.815	3.871
4.27	3.321	4.091	3.682	5.432	3.699	3.775	4.1	3.516	3.279	4.214	4.134	4.102	4.762			2.908	2.986	3.125	3.579	3.005	3.979	2.253	2.627	3.278	2.555	2.664	3.027	3.815	3.871
4.27	3.321	4.091	3.682	5.511	3.699	3.775	4.12	3.516	3.279	4.214	4.134	4.102	4.804			2.908	3.049	3.158	3.579	3.005	3.979	2.253	2.627	3.363	2.555	2.664	3.027	3.815	3.871
4.27	3.321	4.091	3.682	5.565	3.699	3.793	4.132	3.516	3.279	4.214	4.153	4.112	4.846			2.908	3.111	3.158	3.579	3.005	3.979	2.253	2.627	3.431	2.555	2.664	3.027	3.815	3.871
4.27	3.321	4.199	3.682	5.631	3.699	3.793	4.135	3.516	3.279	4.214	4.153	4.194	4.858			2.937	3.174	3.232	3.579	3.005	3.979	2.253	2.627	3.431	2.555	2.664	3.027	3.815	3.871
4.39	3.321	4.199	3.682	5.631	3.699	3.834	4.135	3.516	3.279	4.235	4.226	4.194	4.858			3.072	3.237	3.307	3.579	3.005	3.979	2.253	2.627	3.431	2.555	2.739	3.027	3.815	3.871
4.456	3.321	4.199	3.682	5.631	3.699	3.955	4.135	3.516	3.279	4.281	4.272	4.194	4.858			3.165	3.237	3.325	3.579	3.005	3.979	2.259	2.627	3.431	2.555	2.765	3.027	3.815	3.871
4.456	3.321	4.205	3.691	5.631	3.716	4.076	4.135	3.516	3.279	4.283	4.272	4.194	4.858			3.165	3.238	3.325	3.579	3.005	3.979	2.422	2.666	3.431	2.555	2.765	3.027	3.815	3.871
4.456	3.399	4.214	3.735	5.631	3.74	4.118	4.136	3.518	3.279	4.283	4.272	4.2	4.903			3.165	3.249	3.325	3.579	3.119	3.979	2.454	2.733	3.431	2.555	2.765	3.027	3.815	3.871
4.456	3.499	4.224	3.78	5.631	3.74	4.118	4.137	3.587	3.279	4.284	4.277	4.208	4.932			3.168	3.249	3.328	3.579	3.169	3.979	2.454	2.801	3.431	2.56	2.765	3.038	3.815	3.886
4.456	3.571	4.269	3.824	5.631	3.747	4.118	4.138	3.614	3.279	4.396	4.277	4.208	4.932			3.171	3.249	3.349	3.579	3.171	3.979	2.454	2.864	3.431	2.598	2.765	3.108	3.815	3.962
4.461	3.578	4.314	3.868	5.631	3.761	4.118	4.154	3.614	3.279	4.42	4.277	4.208	4.932			3.174	3.249	3.361	3.579	3.171	3.979	2.454	2.864	3.431	2.637	2.765	3.178	3.815	4.003
4.546	3.59	4.358	3.868	5.631	3.776	4.118	4.154	3.614	3.279	4.42	4.277	4.636	4.932			3.214	3.249	3.427	3.579	3.171	3.983	2.454	2.864	3.431	2.675	2.765	3.218	3.815	4.085
4.631	3.598	4.379	3.868	5.647	3.789	4.118	4.154	3.614	3.279	4.42	4.313	4.65	4.932			3.324	3.249	3.489	3.579	3.171	3.989	2.454	2.864	3.432	2.71	2.765	3.218	3.815	4.134
4.716	3.598	4.379	3.868	5.69	3.789	4.118	4.154	3.614	3.279	4.42	4.465	4.65	4.932			3.385	3.249	3.489	3.579	3.171	3.994	2.454	2.864	3.432	2.714	2.765	3.218	3.815	4.211
4.801	3.598	4.379	3.868	5.733	3.789	4.118	4.154	3.62	3.279	4.448	4.607	4.65	4.932			3.385	3.249	3.489	3.579	3.171	4	2.454	2.864	3.432	2.717	2.765	3.218	3.815	4.283
4.886	3.598	4.379	3.868	5.776	3.789	4.205	4.211	3.62	3.279	4.509	4.607	4.65	4.932			3.385	3.249	3.489	3.579	3.171	4.004	2.455	2.864	3.432	2.727	2.765	3.218	3.815	4.283
4.923	3.598	4.379	3.868	5.818	3.795	4.307	4.335	3.657	3.279	4.524	4.607	4.65	4.932			3.385	3.249	3.489	3.579	3.171	4.004	2.469	2.864	3.456	2.74	2.825	3.218	3.863	4.283
4.923	3.598	4.379	3.868	5.818	3.825	4.307	4.438	3.723	3.279	4.568	4.607	4.65	4.933			3.385	3.249	3.489	3.585	3.174	4.084	2.484	2.909	3.525	2.741	2.9	3.24	3.929	4.283
4.923	3.619	4.384	3.868	5.818	3.855	4.307	4.438	3.788	3.279	4.612	4.607	4.65	4.938			3.385	3.249	3.489	3.592	3.174	4.129	2.498	2.973	3.594	2.741	2.922	3.742	3.983	4.283
4.923	3.674	4.431	3.868	5.818	3.885	4.307	4.438	3.853	3.279	4.656	4.622	4.65	4.98			3.385	3.249	3.489	3.593	3.174	4.129	2.511	3.037	3.664	2.741	2.922	3.758	4.093	4.283
4.923	3.73	4.486	3.868	5.818	3.915	4.307	4.438	3.918	3.279	4.7	4.632	4.65	5.039			3.385	3.303	3.489	3.593	3.174	4.172	2.592	3.101	3.733	2.741	2.922	3.798	4.265	4.283
4.923	3.785	4.542	3.868	5.818	3.918	4.307	4.438	3.929	3.279	4.744	4.641	4.65	5.083			3.425	3.361	3.489	3.599	3.174	4.172	2.666	3.165	3.802	2.771	2.972	3.839	4.437	4.283
4.978	3.84	4.597	3.868	5.818	3.918	4.372	4.438	3.929	3.279	4.788	4.701	4.665	5.083			3.591	3.403	3.489	3.602	3.796	4.172	2.684	3.198	3.871	2.883	3.047	3.88	4.524	4.283
5.058	3.882	4.652	3.868	5.818	3.918	4.436	4.438	3.929	3.279	4.832	4.761	4.667	5.083			3.757	3.507	3.5	3.602	3.82	4.172	2.708	3.239	3.942	2.995	3.121	3.921	4.729	4.374
5.137	3.907	4.708	3.89	5.818	3.965	4.5	4.438	3.942	3.279	4.858	4.821	4.685	5.083			3.923	3.512	3.554	3.602	3.932	4.172	2.739	3.293	3.994	3.107	3.163	3.932	4.934	4.484
5.217	3.968	4.763	3.951	5.818	4.044	4.567	4.445	3.994	3.279	4.858	4.881	4.701	5.083			4.045	3.512	3.607	3.602	3.962	4.172	3.225	3.347	4.103	3.22	3.182	3.932	5.037	4.52
5.296	4.029	4.819	4.012	5.818	4.124	4.813	4.445	4.047	3.279	4.858	4.941	4.727	5.083			4.093	3.549	3.661	3.602	3.962	4.172	3.293	3.401	4.211	3.332	3.213	3.953	5.037	4.52
5.376	4.091	4.874	4.073	5.831	4.189	5.313	4.523	4.099	3.279	4.858	5.001	4.74	5.083			4.155	3.576	3.714	3.604	3.962	4.172	3.293	3.409	4.32	3.444	3.245	3.978	5.037	4.52
5.435	4.152	4.929	4.134	5.855	4.189	5.322	4.616	4.151	3.279	4.858	5.062	4.821	5.083			4.217	3.576	3.758	3.626	3.962	4.172	3.293	3.421	4.428	3.533	3.277	4.002	5.037	4.52
5.435	4.21	4.985	4.174	5.88	4.189	5.34	4.709	4.203	3.279	4.917	5.123	4.948	5.083			4.279	3.592	3.758	3.648	3.962	4.172	3.306	3.456	4.537	3.547	3.302	4.027	5.037	4.52
5.435	4.21	5.011	4.236	5.904	4.189	5.342	4.751	4.249	3.279	4.991	5.14	4.997	5.083			4.324	3.592	3.758	3.672	3.962	4.172	3.307	3.491	4.616	3.589	3.302	4.051	5.037	4.52
5.435	4.21	5.011	4.336	5.917	4.189	5.342	4.751	4.249	3.298	5.069	5.188	4.997	5.083			4.324	3.592	3.758	3.739	3.962	4.172	3.33	3.527	4.637	3.631	3.302	4.076	5.037	4.52
5.435	4.21	5.011	4.399	5.917	4.189	5.345	4.78	4.253	3.328	5.07	5.236	4.997	5.086			4.324	3.604	4.092	3.806	3.962	4.172	3.33	3.556	4.717	3.649	3.302	4.098	5.037	4.52
5.471	4.215	5.055	4.418	5.917	4.189	5.345	4.843	4.253	3.359	5.07	5.262	5.014	5.09			4.324	3.613	4.319	3.872	3.962	4.172	3.352	3.586	4.796	3.649	3.302	4.098	5.037	4.52
5.543	4.264	5.108	4.445	5.917	4.189	5.345	4.894	4.253	3.39	5.07	5.262	5.123	5.09			4.324	3.613	4.326	3.939	3.962	4.172	3.352	3.648	4.849	3.649	3.302	4.098	5.037	4.52
5.615	4.264	5.163	4.471	5.917	4.189	5.348	4.894	4.253	3.421	5.07	5.262	5.134	5.09			4.324	3.613	4.351	3.99	3.962	4.172	3.352	3.71	4.849	3.649	3.302	4.098	5.037	4.52
5.691	4.264	5.163	4.474	5.917	4.189	5.35	4.894	4.253	3.436	5.07	5.262	5.162	5.231			4.324	3.613	4.376	3.99	3.962	4.172	3.352	3.772	4.849	3.649	3.302	4.098	5.037	4.52
5.692	4.264	5.163	4.474	5.917	4.189	5.352	4.894	4.253	3.436	5.07	5.779	5.162	5.231			4.324	3.613	4.384	3.99	3.962	4.21	3.352	3.822	4.849	3.649	3.407	4.098	5.037	4.52
5.692	4.264	5.163	4.488	5.917	4.189	5.352	4.894	4.253	3.436	5.07	5.967	5.162	5.231			4.324	3.613	4.384	3.991	3.962	4.21	3.352	3.822	4.849	3.649	3.496	4.098	5.037	4.52
5.692	4.264	5.163	4.501	5.917	4.272	5.352	4.894	4.253	3.436	5.07	5.974	5.162	5.231			4.324	3.613	4.384	4.02	3.974	4.21	3.352	3.822	4.849	3.649	3.496	4.098	5.037	4.52
5.692	4.264	5.163	4.501	5.917	4.412	5.352	4.894	4.253	3.436	5.07	5.974	5.218	5.231			4.324	3.613	4.384	4.065	3.99	4.21	3.352	3.822	4.849	3.649	3.505	4.098	5.037	4.52
5.692	4.264	5.163	4.501	5.917	4.452	5.352	4.911	4.253	3.436	5.07	5.974	5.34	5.231			4.324	3.613	4.384	4.111	3.99	4.21	3.352	3.822	4.849	3.649	3.514	4.098	5.037	4.52
5.692	4.264	5.163	4.501	5.917	4.452	5.352	4.961	4.253	3.436	5.07	5.974	5.34	5.231			4.324	3.613	4.384	4.156	3.99	4.21	3.352	3.822	4.849	3.649	3.516	4.098	5.037	4.52
5.692	4.264	5.163	4.501	5.917	4.452	5.352	4.961	4.253	3.436	5.07	5.974	5.34	5.231			4.324	3.613	4.384	4.191	3.99	4.21	3.352	3.822	4.849	3.649	3.521	4.098	5.037	4.52
5.692	4.264	5.163	4.501	5.917	4.452	5.352	4.964	4.253	3.449	5.07	5.974	5.34	5.231			4.324	3.613	4.384	4.195	3.99	4.21	3.352	3.822	4.849	3.65	3.521	4.098	5.037	4.52
5.692	4.264	5.163	4.501	5.917	4.452	5.359	4.964	4.258	3.534	5.07	5.974	5.34	5.231			4.324	3.613	4.384	4.213	3.99	4.21	3.363	3.822	4.849	3.65	3.523	4.098	5.037	4.52
5.692	4.264	5.163	4.501	5.917	4.452	5.359	4.964	4.258	3.555	5.07	5.974	5.34	5.231			4.324	3.613	4.384	4.213	3.99	4.21	3.363	3.822	4.849	3.65	3.529	4.098	5.037	4.52
5.692	4.264	5.163	4.501	5.917	4.452	5.359	4.964	4.258	3.555	5.07	5.974	5.34	5.231			4.324	3.613	4.384	4.215	3.99	4.21	3.363	3.822	4.849	3.65	3.535	4.098	5.037	4.52
5.692	4.264	5.163	4.501	5.917	4.452	5.359	4.964	4.258	3.555	5.07	5.974	5.34	5.231			4.324	3.613	4.384	4.226	3.99	4.21	3.363	3.822	4.849	3.65	3.541	4.098	5.037	4.52
5.692	4.666	5.163	4.501	5.917	4.452	5.359	4.964	4.258	3.568	5.07	5.974	5.34	5.231			4.324	3.613	4.384	4.232	3.99	4.21	3.363	3.822	4.849	3.65	3.543	4.098	5.037	4.52
5.692	4.971	5.163	4.501	5.917	4.452	5.359	4.964	4.258	3.638	5.104	5.974	5.34	5.231			4.324	3.614	4.384	4.232	3.99	4.21	3.363	3.822	4.849	3.65	3.595	4.1	5.089	4.52
5.692	4.98	5.163	4.501	5.917	4.452	5.359	4.964	4.258	3.638	5.143	5.974	5.34	5.231			4.324	3.614	4.384	4.232	3.99	4.21	3.364	3.822	4.849	3.65	3.595	4.1	5.09	4.52
5.692	4.996	5.163	4.501	5.917	4.452	5.359	4.964	4.258	3.638	5.182	5.974	5.34	5.231			4.324	3.614	4.384	4.232	3.99	4.21	3.364	3.822	4.849	3.65	3.595	4.1	5.148	4.52
5.692	5.012	5.163	4.56	5.917	4.452	5.359	4.984	4.258	3.638	5.22	5.974	5.34	5.231			4.324	3.614	4.384	4.232	3.99	4.21	3.364	3.822	4.849	3.65	3.595	4.1	5.148	4.52
5.692	5.028	5.163	4.666	5.917	4.452	5.359	5.058	4.258	3.638	5.228	5.974	5.34	5.231			4.324	3.614	4.384	4.232	3.99	4.21	3.364	3.822	4.849	3.65	3.595	4.1	5.148	4.52
5.712	5.036	5.163	4.759	5.917	4.452	5.359	5.132	4.258	3.644	5.228	5.974	5.357	5.231			4.324	3.614	4.393	4.232	3.99	4.21	3.364	3.822	4.849	3.65	3.595	4.1	5.198	4.52
5.762	5.048	5.163	4.78	5.917	4.452	5.412	5.207	4.258	3.647	5.23	5.979	5.405	5.231			4.324	3.614	4.393	4.232	3.99	4.21	3.364	3.822	4.849	3.65	3.595	4.1	5.198	4.52
5.762	5.069	5.163	4.859	5.917	4.452	5.474	5.281	4.301	3.647	5.23	5.985	5.428	5.231			4.324	3.614	4.393	4.232	3.99	4.21	3.364	3.822	4.849	3.65	3.595	4.1	5.198	4.52
5.762	5.082	5.17	4.943	5.917	4.452	5.536	5.332	4.4	3.675	5.23	5.992	5.428	5.231			4.324	3.614	4.393	4.232	3.99	4.21	3.364	3.822	4.849	3.65	3.595	4.1	5.198	4.52
5.762	5.082	5.17	5.027	5.917	4.452	5.564	5.332	4.456	3.717	5.23	5.992	5.428	5.231			4.324	3.614	4.393	4.232	3.99	4.21	3.364	3.822	4.849	3.65	3.595	4.1	5.198	4.52
5.762	5.083	5.17	5.111	5.917	4.452	5.571	5.332	4.456	3.759	5.23	6.015	5.428	5.231			4.324	3.614	4.393	4.232	3.99	4.21	3.367	3.822	4.849	3.65	3.595	4.1	5.198	4.52
5.762	5.083	5.17	5.133	5.917	4.491	5.6	5.332	4.456	3.8	5.23	6.037	5.428	5.231			4.324	3.614	4.393	4.232	3.993	4.21	3.377	3.822	4.849	3.65	3.595	4.1	5.198	4.52
5.762	5.083	5.17	5.14	5.917	4.53	5.691	5.332	4.456	3.805	5.23	6.056	5.428	5.259			4.324	3.614	4.393	4.232	3.993	4.21	3.377	3.825	4.849	3.65	3.595	4.1	5.198	4.52
5.762	5.083	5.17	5.14	5.917	4.57	5.781	5.332	4.456	3.805	5.23	6.056	5.428	5.259			4.324	3.614	4.393	4.232	4	4.21	3.377	3.829	4.849	3.651	3.595	4.1	5.198	4.52
5.762	5.083	5.17	5.14	5.917	4.609	5.793	5.332	4.456	3.805	5.23	6.056	5.428	5.259			4.324	3.614	4.393	4.232	4.001	4.21	3.377	3.906	4.849	3.658	3.595	4.104	5.198	4.52
5.762	5.083	5.17	5.14	5.919	4.627	5.793	5.332	4.456	3.805	5.23	6.056	5.428	5.259			4.324	3.614	4.393	4.232	4.007	4.21	3.377	3.983	4.849	3.662	3.595	4.105	5.198	4.52
5.762	5.083	5.17	5.14	5.971	4.627	5.793	5.332	4.456	3.815	5.23	6.056	5.428	5.259			4.324	3.614	4.393	4.232	4.013	4.21	3.378	3.993	4.849	3.662	3.595	4.12	5.198	4.52
5.762	5.083	5.17	5.14	6.004	4.627	5.8	5.332	4.456	3.851	5.23	6.056	5.428	5.259			4.324	3.614	4.393	4.232	4.014	4.21	3.379	3.993	4.849	3.666	3.595	4.125	5.198	4.52
5.762	5.083	5.17	5.142	6.004	4.629	5.8	5.332	4.456	3.887	5.23	6.056	5.428	5.259			4.324	3.614	4.393	4.232	4.023	4.273	3.379	4.024	4.849	3.666	3.595	4.125	5.198	4.52
5.762	5.083	5.17	5.142	6.004	4.634	5.8	5.332	4.456	3.924	5.23	6.056	5.428	5.259			4.324	3.614	4.393	4.233	4.033	4.273	3.379	4.024	4.849	3.666	3.595	4.125	5.198	4.52
5.762*	5.083*	5.17*	5.142*	6.004*	4.634*	5.8*	5.332*	4.456*	3.96*	5.23*	6.056*	5.428*	5.259*
