# Supplementary material for: Cold-induced hyperphagia requires AgRP neuron activation in mice
Source: eLife journal article supplement (doi:10.7554/elife.58764), 2020-12-15
Supplement: supp [file elife-58764-supp-v1.zip › elife_poa_e58764_Figure_3_source_data_1.xlsx]

## Sheet: Figure 3 and Fig3 SFig1
22C group							14C group							30C group								22C group						14C group						30C group
4-4	green	red	yellow	% of Agrp that are cFOS+	Agrp+/cFOS+ (%)		4-2	green	red	yellow	% of Agrp that are cFOS+	Agrp+/cFOS+ (%)		6-6	green	red	yellow	% of Agrp that are cFOS+	Agrp+/cFOS+ (%)
a				#DIV/0!	#DIV/0!		a	52	47	14	0.269231	0.297872		a	44	9	0	0	0				DMH						DMH						DMH
b	130	44	1	0.00769231	0.0227273		b	101	77	17	0.168317	0.220779		b	99	18	0	0	0				section 1	section 2	section 3	sum			section 1	section 2	section 3				section 1	section 2	section 3
c	126	22	0	0	0		c	95	42	11	0.115789	0.261905		c	80	11	1	0.0125	0.0909091			4-4	32	56	86	174		4-2	38	136	150	324		6-6	10	13	41	64
d	115	21	4	0.0347826	0.190476		d	98	69	14	0.142857	0.202899		d	106	2	0	0	0			4-5	79	47	64	190		4-3	61	65	75	201		6-7	7	38	40	85
e	123	30	9	0.0731707	0.3		e	121	58	13	0.107438	0.224138		e	102	3	0	0	0			4-6	69	55	74	198		6-3	22	21	65	108		6-9	21	36	36	93
f	176	33	3	0.0170455	0.0909091		f	139	51	11	0.0791367	0.215686		f	157	9	0	0	0			6-1	27	52	47	126		6-4	25	45	39	109
g	98	7	0	0	0		g	110	37	14	0.127273	0.378378		g	67	5	0	0	0			6-2	28	90	66	184		6-5	21	15	50	86
h	27	12	1	0.037037	0.0833333		h	46	38	6	0.130435	0.157895		h	38	0	0	0	#DIV/0!																rRPa
	795	169	18	0.0226415	0.106509			762	419	100	0.131234	0.238663			693	57	1	0.001443	0.0175439				rRPa						rRPa						section 1	section 2	section 3
																							section 1	section 2	section 3				section 1	section 2	section 3			6-6	0	1		1
4-5	green	red	yellow				4-3	green	red	yellow				6-7	green	red	yellow					4-4	5	6		11		4-2	4	6		10		6-7	2	0		2
a				#DIV/0!	#DIV/0!		a	112	97	20	0.178571	0.206186		a	10	6	1	0.1	0.166667			4-5	6	4		10		4-3	3	9		12		6-9	0	2		2
b	101	40	7	0.0693069	0.175		b				#DIV/0!	#DIV/0!		b	87	26	3	0.0344828	0.115385			4-6	3	6		9		6-3	9	12		21
c	102	26	1	0.00980392	0.0384615		c	106	109	21	0.198113	0.192661		c	114	21	1	0.00877193	0.047619			6-1	4	7		11		6-4	9	0		9
d	132	49	2	0.0151515	0.0408163		d	116	88	22	0.189655	0.25		d	98	8	0	0	0			6-2	9	10		19		6-5	9	8		17			PBN
e	129	17	5	0.0387597	0.294118		e	139	101	19	0.136691	0.188119		e	137	7	0	0	0																section 1	section 2	section 3
f	164	39	9	0.054878	0.230769		f	106	84	17	0.160377	0.202381		f	115	8	0	0	0				PBN						PBN					6-6	73			73
g	94	19	1	0.0106383	0.0526316		g	106	83	17	0.160377	0.204819		g	148	6	0	0	0				section 1	section 2	section 3				section 1	section 2	section 3			6-7	38			38
h	65	7	1	0.0153846	0.142857		h	34	31	11	0.323529	0.354839		h	85	8	0	0	0			4-4	106			106		4-2	175			175		6-9	85			85
	787	197	26	0.0330368	0.13198			719	593	127	0.176634	0.214165		i	33	1	0	0	0			4-5	58			58		4-3	194			194
															827	91	5	0.00604595	0.0549451			4-6	45			45		6-3	150			150
4-6	green	red	yellow				6-3	green	red	yellow												6-1	106			106		6-4	233			233			VMPO
a	15	17	0	0	0		a	58	26	10	0.172414	0.384615		6-9	green	red	yellow					6-2	96			96		6-5	222			222			section 1	section 2	section 3
b				#DIV/0!	#DIV/0!		b	124	65	24	0.193548	0.369231		a	31	7	0	0	0															6-6	89	97		186
c	115	34	1	0.00869565	0.0294118		c	133	55	23	0.172932	0.418182		b	99	36	3	0.030303	0.0833333				VMPO						VMPO					6-7	177	210		387
d	130	31	1	0.00769231	0.0322581		d	141	71	24	0.170213	0.338028		c	127	3	0	0	0				section 1	section 2	section 3				section 1	section 2	section 3			6-9	139	81		220
e	115	23	1	0.00869565	0.0434783		e	157	74	33	0.210191	0.445946		d	122	10	2	0.0163934	0.2			4-4	364	270		634		4-2	1076	1042		2118
f	160	38	4	0.025	0.105263		f	144	85	42	0.291667	0.494118		e	111	14	1	0.00900901	0.0714286			4-5	349	275		624		4-3	486	283		769
g	98	13	1	0.0102041	0.0769231		g	68	40	24	0.352941	0.6		f	168	13	1	0.00595238	0.0769231			4-6	202	158		360		6-3	321	387		708
h	49	3	0	0	0		h	26	20	11	0.423077	0.55		g	152	7	1	0.00657895	0.142857			6-1	239	208		447		6-4	254	231		485
	682	159	8	0.0117302	0.0503145			851	436	191	0.224442	0.438073		h	69	2	0	0	0			6-2	195	159		354		6-5	181	163		344
															879	92	8	0.00910125	0.0869565
6-1	green	red	yellow	% activated
a	43	25	5	0.116279	0.2		6-4	green	red	yellow
b	82	26	7	0.0853659	0.269231		a	8	6	2	0.25	0.333333
c	94	33	11	0.117021	0.333333		b	132	50	13	0.0984848	0.26
d	91	25	6	0.0659341	0.24		c	115	50	19	0.165217	0.38
e	116	18	9	0.0775862	0.5		d	94	44	25	0.265957	0.568182
f	129	8	5	0.0387597	0.625		e	115	38	15	0.130435	0.394737
g	99	13	3	0.030303	0.230769		f	133	60	35	0.263158	0.583333
h (3a)	46	9	5	0.108696	0.555556		g	90	57	16	0.177778	0.280702
				#DIV/0!	#DIV/0!		h	52	24	14	0.269231	0.583333
	700	157	51	0.0728571	0.324841		i	9	6	0	0	0
								748	335	139	0.185829	0.414925
6-2	green	red	yellow
a	45	13	5	0.111111	0.384615		6-5	green	red	yellow
b	95	41	9	0.0947368	0.219512		a	66	59	20	0.30303	0.338983
c	113	40	18	0.159292	0.45		b	93	83	27	0.290323	0.325301
d	121	30	15	0.123967	0.5		c	92	75	28	0.304348	0.373333
e	121	40	12	0.0991736	0.3		d	122	92	37	0.303279	0.402174
f	132	33	15	0.113636	0.454545		e	125	91	41	0.328	0.450549
g	107	23	12	0.11215	0.521739		f	111	68	25	0.225225	0.367647
h	45	18	7	0.155556	0.388889		g	79	49	17	0.21519	0.346939
i	5	6	3	0.6	0.5		h	32	36	17	0.53125	0.472222
	784	244	96	0.122449	0.393443						#DIV/0!	#DIV/0!
								720	553	212	0.294444	0.383363
