# Supplementary material for: Cold-induced hyperphagia requires AgRP neuron activation in mice
Source: eLife journal article supplement (doi:10.7554/elife.58764), 2020-12-15
Supplement: supp [file elife-58764-supp-v1.zip › elife_poa_e58764_Figure_4_source_data_1.xlsx]

## Sheet: Fig 4F Mean dFF (%)
mean dF/F (%) 10 minutes
	Transition					Transition
Animal #	30C	14C			Animal #	14C	30C
6-1	-1.1885	-0.0639			6-1	0.8871	-0.7461
6-3	-0.4764	0.4373			6-3	0.7283	0.0874
6-5	-1.4976	4.7612			6-5	1.2967	0.1952
6-9	1.2314	3.9707			6-9	2.4754	3.669
6-16	-0.2068	0.4648			6-16	0.6566	-0.0703
14-2	-0.6382	4.2392			14-2	3.6209	1.4875
14-3	-1.7104	1.4619			14-3	1.882	-0.262
14-6	-1.1719	1.2602			14-6	0.4267	0.4025
14-7	-1.0945	-0.1716			14-7	-0.3578	-0.683
