# Supplementary material for: Cold-induced hyperphagia requires AgRP neuron activation in mice
Source: eLife journal article supplement (doi:10.7554/elife.58764), 2020-12-15
Supplement: supp [file elife-58764-supp-v1.zip › elife_poa_e58764_Figure_5_figure_supplement_2_source_data_1.xlsx]

## Sheet: Fig 5-Sfig 2A B C (FI)
	30C mCherry-CNO									30C mCherry-Saline											22C mCherry-CNO									22C mCherry-CNO											14C mCherry-CNO
	0	0	0	0	0	0	Hopper fail-exclude	0	Hopper fail-exclude	0	0	0	0	0	0	Hopper fail-exclude	0	Hopper fail-exclude			0	0	0	0	0	0	Hopper fail-exclude	0	Hopper fail-exclude	0	0	0	0	0	0	Hopper fail-exclude	0	Hopper fail-exclude			0	0	0	0	0	0	0	0	0
	0	0	0	0.04	0.02	0	0	0.11	0	0	0.01	0	0.08	0.02	0.1	0	0.23	0			0	0	0	0.06	0.05	0.05	0	0.21	0	0.23	0	0.02	0.13	0.02	0	0	0.1	0			0.09	0.05	0	0.02	0	0	0.32	0	0
	0	0	0	0.08	0.03	0	0	0.21	0	0	0.02	0	0.09	0.04	0.21	0	0.48	0			0	0	0.07	0.06	0.1	0.27	0	0.43	0	0.46	0	0.05	0.13	0.04	0	0	0.16	0			0.18	0.11	0.25	0.04	0	0	0.6	0	0.11
	0	0	0	0.12	0.04	0	0	0.32	0	0	0.03	0	0.12	0.05	0.32	0	0.73	0			0	0	0.17	0.06	0.13	0.35	0	0.63	0	0.61	0	0.05	0.13	0.04	0	0	0.32	0			0.2	0.16	0.57	0.05	0	0	0.6	0	0.24
	0	0	0	0.15	0.11	0	0	0.43	0	0	0.04	0.01	0.14	0.06	0.37	0	0.97	0			0	0	0.26	0.06	0.13	0.42	0	0.83	0	0.61	0	0.05	0.18	0.04	0	0	0.48	0			0.39	0.22	0.72	0.05	0	0	0.6	0	0.62
	0	0	0	0.15	0.12	0	0	0.54	0	0.18	0.05	0.02	0.18	0.07	0.37	0	1.22	0			0	0.07	0.3	0.16	0.13	0.42	0	0.87	0	0.62	0	0.1	0.33	0.04	0.06	0	0.64	0			0.56	0.27	0.82	0.11	0	0	0.6	0	1
	0.12	0	0.06	0.15	0.16	0	0	0.64	0	0.18	0.06	0.04	0.21	0.07	0.37	0	1.47	0			0	0.07	0.3	0.19	0.13	0.42	0	1.05	0	0.73	0.16	0.32	0.36	0.04	0.21	0	0.8	0			0.56	0.33	0.93	0.11	0	0	0.6	0	1.11
	0.14	0	0.1	0.15	0.16	0	0	1.06	0	0.18	0.06	0.05	0.27	0.07	0.37	0	1.72	0			0.63	0.07	0.3	0.19	0.13	0.42	0	1.22	0	0.77	0.36	0.47	0.36	0.04	0.35	0	0.96	0			0.61	0.38	0.93	0.11	0	0	0.6	0	1.11
	0.14	0	0.11	0.15	0.16	0	0	1.17	0	0.34	0.07	0.09	0.29	0.07	0.37	0	1.77	0			1.22	0.07	0.3	0.19	0.13	0.42	0	1.4	0	0.77	0.56	0.47	0.36	0.04	0.5	0	1.12	0			0.66	0.4	0.93	0.11	0	0	0.61	0.06	1.53
	0.14	0	0.11	0.15	0.16	0	0	1.45	0	0.34	0.07	0.14	0.29	0.07	0.69	0	1.77	0			1.22	0.07	0.3	0.19	0.13	0.42	0	1.56	0	0.77	0.76	0.47	0.36	0.04	0.64	0	1.28	0			0.66	0.4	0.93	0.11	0	0	1.23	0.39	1.55
	0.19	0	0.11	0.15	0.16	0	0	1.48	0	0.34	0.07	0.14	0.4	0.07	1.37	0	1.77	0			1.22	0.07	0.3	0.19	0.13	0.42	0	1.56	0	0.77	0.81	0.47	0.36	0.04	0.71	0	1.43	0			0.66	0.55	1.11	0.11	0	0	1.23	0.69	1.55
	0.23	0	0.11	0.15	0.16	0	0	1.48	0	0.34	0.07	0.14	0.53	0.07	1.38	0	1.77	0			1.22	0.07	0.37	0.19	0.13	0.42	0	1.59	0	0.77	0.88	0.47	0.36	0.04	0.74	0	1.59	0			0.66	0.55	1.19	0.11	0	0	1.23	0.91	1.55
	0.23	0.1	0.12	0.15	0.16	0	0	1.68	0	0.62	0.07	0.14	0.53	0.07	1.38	0	2	0			1.22	0.07	0.45	0.19	0.13	0.42	0	1.64	0	0.86	0.88	0.47	0.36	0.04	0.74	0	1.75	0			0.66	0.55	1.19	0.11	0	0	1.23	1.21	1.57
	0.23	0.25	0.12	0.15	0.16	0	0	1.89	0	0.8	0.07	0.14	0.53	0.07	1.41	0	2.12	0			1.22	0.07	0.45	0.19	0.13	0.42	0	1.68	0	0.99	0.88	0.47	0.36	0.04	0.74	0	1.91	0			0.66	0.55	1.19	0.11	0.23	0	1.26	1.6	1.57
	0.23	0.28	0.12	0.15	0.16	0	0	1.89	0	0.8	0.07	0.14	0.53	0.07	1.42	0	2.29	0			1.22	0.07	0.45	0.26	0.13	0.42	0	1.69	0	0.99	0.88	0.47	0.36	0.04	0.74	0	2.07	0			0.66	0.55	1.19	0.66	0.23	0	1.26	2	3.22
	0.23	0.28	0.12	0.23	0.16	0	0	1.89	0	0.8	0.07	0.14	0.53	0.07	1.42	0	2.29	0			1.22	0.07	0.45	0.26	0.13	0.42	0	1.69	0	0.99	0.88	0.47	0.36	0.04	0.74	0	2.23	0			0.66	0.55	1.72	0.77	0.23	0	1.26	2.25	3.25
	0.23	0.28	0.12	0.33	0.16	0	0	1.89	0	0.8	0.07	0.14	0.53	0.07	1.42	0	2.35	0			1.22	0.07	0.45	0.26	0.13	0.42	0	1.69	0	0.99	0.88	0.47	0.36	0.04	0.74	0	2.39	0			0.66	0.55	1.73	0.77	0.23	0	1.26	2.71	3.25
	0.23	0.28	0.12	0.33	0.16	0	0	1.89	0	0.8	0.07	0.14	0.53	0.07	1.42	0	2.41	0			1.22	0.07	0.45	0.26	0.32	0.42	0	1.8	0	0.99	0.88	0.47	0.36	0.04	0.74	0	2.48	0			0.79	0.55	1.73	0.77	0.23	0	1.26	3.16	3.25
	0.23	0.28	0.12	0.33	0.16	0	0	1.89	0	0.8	0.07	0.14	0.53	0.07	1.42	0	2.41	0			1.22	0.07	0.45	0.26	0.38	0.42	0	1.84	0	0.99	0.88	0.57	0.36	0.04	0.74	0	2.51	0			1.08	0.55	1.77	0.77	0.23	0	1.26	3.16	3.25
	0.23	0.28	0.12	0.33	0.16	0	0	1.89	0	0.8	0.07	0.14	0.53	0.08	1.42	0	2.41	0			1.42	0.07	0.45	0.26	0.38	0.42	0	1.84	0	0.99	0.97	0.8	0.66	0.05	0.74	0	2.52	0			1.26	0.55	1.79	0.77	0.23	0	1.26	3.98	3.25
	0.23	0.28	0.12	0.33	0.16	0	0	1.89	0	0.8	0.07	0.14	0.53	0.08	1.42	0	2.41	0			1.78	0.07	0.45	0.35	0.38	0.42	0	1.84	0	0.99	1.07	0.8	0.87	0.06	0.74	0	2.59	0			1.26	0.55	1.79	0.77	0.23	0	1.26	4.34	3.25
	0.23	0.28	0.12	0.33	0.16	0	0	1.89	0	0.8	0.07	0.14	0.65	0.08	1.42	0	2.41	0			1.91	0.07	0.45	0.35	0.38	0.42	0	1.84	0	0.99	1.18	0.8	0.87	0.06	0.74	0	2.66	0			1.26	0.55	1.85	1.41	0.23	0	1.26	4.4	3.25
	0.23	0.28	0.12	0.33	0.16	0	0	1.89	0	0.91	0.07	0.21	0.77	0.08	1.42	0	2.41	0			1.91	0.07	0.45	0.35	0.38	0.42	0	1.84	0	0.99	1.21	0.8	0.87	0.06	0.74	0	2.66	0			1.26	0.55	1.85	1.41	0.23	0	1.26	4.71	3.25
	0.23	0.28	0.12	0.33	0.16	0	0	1.89	0	1.33	0.07	0.39	0.77	0.08	1.42	0	2.41	0			1.94	0.07	0.45	0.35	0.38	0.42	0	1.84	0	0.99	1.21	0.8	0.87	0.06	0.74	0	2.66	0			1.26	0.55	1.85	1.41	0.23	0	1.26	4.71	3.25
	0.23	0.28	0.12	0.33	0.16	0	0	1.89	0	1.47	0.07	0.56	0.77	0.08	1.42	0	2.41	0			2.17	0.07	0.46	0.35	0.38	0.42	0	1.84	0	0.99	1.21	0.8	0.87	0.06	0.74	0	2.89	0			1.37	0.69	1.85	1.41	0.23	0	1.26	4.71	3.25
	0.23	0.28	0.12	0.33	0.16	0	0	1.89	0	1.47	0.07	0.62	0.77	0.08	1.42	0	2.41	0			2.17	0.07	0.47	0.35	0.38	0.42	0	1.84	0	0.99	1.21	0.8	0.87	0.06	0.76	0	2.89	0			1.37	0.86	1.85	1.41	0.23	0	1.26	4.71	3.25
	0.23	0.28	0.3	0.33	0.16	0	0	1.89	0	1.47	0.07	0.64	0.77	0.08	1.42	0	2.41	0			2.17	0.07	0.58	0.35	0.65	0.42	0	1.84	0	0.99	1.21	0.8	0.87	0.06	0.89	0	2.92	0			1.37	1.02	1.85	1.63	0.23	0	1.26	5.15	3.25
	0.23	0.28	0.35	0.33	0.16	0	0	1.89	0	1.47	0.07	0.64	0.77	0.08	1.42	0	2.41	0			2.17	0.07	0.72	0.35	1.07	0.42	0	1.84	0	0.99	1.21	0.8	0.87	0.06	0.93	0	2.92	0			1.61	1.18	1.85	1.85	0.23	0	1.26	5.6	3.25
	0.23	0.28	0.42	0.33	0.16	0	0	1.89	0	1.47	0.07	0.64	0.77	0.08	1.42	0	2.44	0			2.17	0.07	0.82	0.35	1.28	0.42	0	1.84	0	0.99	1.21	0.8	0.87	0.06	0.93	0	2.92	0			1.94	1.23	2.06	1.85	0.42	0	3.32	5.65	3.25
	0.53	0.28	0.55	0.33	0.16	0	0	1.89	0	1.47	0.07	0.64	0.77	0.08	1.44	0	2.44	0			2.17	0.07	0.82	0.35	1.28	0.46	0	1.84	0	0.99	1.21	0.8	0.87	0.3	0.93	0	2.92	0			2.18	1.23	2.27	1.85	0.8	0	4.11	5.94	3.25
	2.85	0.28	0.55	0.33	0.16	0	0	1.89	0	1.47	0.07	0.64	0.77	0.13	1.57	0	2.44	0			2.17	0.07	0.82	0.35	1.28	0.46	0	1.84	0	0.99	1.21	0.8	0.87	0.4	0.93	0	2.92	0			2.18	1.23	2.37	1.85	0.91	0	4.11	5.94	3.25
	2.89	0.28	0.55	0.33	0.17	0	0	1.89	0	1.47	0.07	0.64	0.77	0.13	1.57	0	2.44	0			2.17	0.07	0.82	0.35	1.28	0.46	0	1.84	0	1.1	1.21	0.8	0.93	0.4	0.93	0	3.19	0			2.18	1.23	2.37	1.85	0.91	0	4.11	5.94	3.25
	2.99	0.28	0.55	0.33	0.19	0	0	1.89	0	1.47	0.07	0.64	0.77	0.13	1.57	0	2.44	0			2.17	0.07	0.82	0.35	1.28	0.46	0	1.84	0	1.23	1.21	0.8	0.94	0.4	0.93	0	3.19	0			2.18	1.23	2.37	1.85	0.91	0	4.11	6.14	3.25
	2.99	0.28	0.55	0.75	0.21	0	0	1.89	0	1.47	0.07	0.64	0.77	0.13	1.57	0	2.44	0			2.17	0.07	0.82	0.36	1.28	0.46	0	1.84	0	1.29	1.21	1.04	0.96	0.4	0.93	0	3.19	0			2.18	1.23	2.37	1.85	0.91	0.09	4.11	6.43	3.25
	2.99	0.28	0.55	0.75	0.23	0	0	1.9	0	1.47	0.07	0.64	0.77	0.13	1.57	0	2.44	0			2.58	0.09	0.82	0.49	1.28	0.46	0	1.84	0	1.29	1.21	1.41	2.03	0.4	0.93	0	3.19	0			2.18	1.23	2.37	2.16	0.91	0.22	4.11	6.43	3.25
	2.99	0.28	0.55	0.91	0.24	0	0	2.32	0	1.58	0.07	0.81	1.23	0.13	1.57	0	2.44	0			2.58	0.09	0.82	0.61	1.28	0.46	0	1.84	0	1.42	1.21	1.49	2.15	0.4	0.93	0	3.19	0			2.18	1.23	2.37	2.53	0.91	0.22	4.11	6.43	3.25
	2.99	0.28	0.55	0.91	0.24	0	0	2.58	0	2.09	0.07	0.99	1.3	0.13	1.57	0	2.44	0			2.58	0.09	0.82	0.73	1.28	0.46	0	1.84	0	1.42	1.21	1.51	2.15	0.4	0.93	0	3.19	0			2.21	1.23	2.37	2.53	0.91	0.22	4.11	6.43	3.25
	2.99	0.28	0.55	0.91	0.24	0	0	2.58	0	2.09	0.07	0.99	1.3	0.13	1.57	0	2.44	0			2.58	0.09	0.82	0.83	1.28	0.46	0	1.84	0	1.42	1.21	1.51	2.15	0.4	0.93	0	3.19	0			2.21	1.23	2.37	2.53	0.91	0.22	4.11	6.43	3.25
	2.99	0.28	0.55	0.91	0.24	0	0	2.66	0	2.09	0.07	0.99	1.3	0.13	1.57	0	2.44	0			2.58	0.09	0.82	0.83	1.28	0.46	0	1.84	0	1.42	1.21	1.51	2.15	0.4	0.93	0	3.19	0			2.21	1.23	2.37	2.53	0.91	0.22	4.11	6.43	3.25
	2.99	0.29	0.55	0.91	0.24	0	0	2.66	0	2.09	0.07	0.99	1.3	0.17	1.57	0	2.44	0			2.58	0.09	0.82	0.83	1.28	0.46	0	1.84	0	1.42	1.21	1.51	2.15	0.4	0.93	0	3.19	0			2.21	1.23	2.37	2.53	0.91	0.22	4.11	6.43	3.25
	2.99	0.29	0.55	0.91	0.24	0	0	2.66	0	2.09	0.07	0.99	1.3	0.26	1.57	0	2.44	0			2.58	0.09	0.82	0.83	1.28	0.46	0	1.84	0	1.42	1.21	1.51	2.15	0.4	0.93	0	3.19	0			2.21	1.23	2.37	2.53	0.91	0.65	4.11	6.43	3.25
	2.99	0.35	0.55	0.91	0.24	0	0	2.66	0	2.09	0.07	0.99	1.3	0.26	1.57	0	2.44	0			2.58	0.09	0.82	0.83	1.28	0.46	0	1.84	0	1.42	1.21	1.51	2.15	0.4	0.97	0	3.19	0			2.21	1.23	2.37	2.53	0.91	0.65	4.11	6.43	3.25
	2.99	0.46	0.55	0.91	0.24	0	0	2.66	0	2.09	0.07	0.99	1.3	0.26	1.57	0	2.44	0			2.58	0.09	0.82	0.83	1.28	0.46	0	1.84	0	1.42	1.21	1.51	2.15	0.4	0.97	0	3.19	0			2.21	1.23	2.37	2.53	0.91	0.65	4.11	6.43	3.25
	2.99	0.56	0.79	0.91	0.24	0	0	2.66	0	2.09	0.07	0.99	1.3	0.27	1.57	0	2.44	0			2.58	0.09	0.82	0.83	1.28	0.46	0	1.84	0	1.42	1.21	1.51	2.15	0.4	0.97	0	3.19	0			2.34	1.23	2.37	2.53	0.91	0.65	4.11	6.43	3.25
	2.99	0.56	1.39	0.91	0.24	0	0	2.66	0	2.09	0.07	0.99	1.3	0.29	1.57	0	2.44	0			2.58	0.09	0.82	0.83	1.28	0.46	0	1.84	0	1.42	1.21	1.51	2.15	0.4	0.97	0	3.19	0			2.5	1.23	2.37	2.65	0.91	0.65	4.11	6.43	3.25
	2.99	0.56	1.74	0.91	0.24	0	0	2.66	0	2.09	0.07	1.27	1.3	0.29	1.61	0	2.44	0			2.58	0.13	0.82	0.83	1.28	0.46	0	1.96	0	1.42	1.21	1.51	2.15	0.4	0.97	0	3.19	0			2.5	1.23	2.64	3.1	0.91	0.65	4.11	6.43	3.25
	2.99	0.56	1.74	0.91	0.24	0	0	2.66	0	2.09	0.13	1.27	1.3	0.29	1.68	0	2.44	0			2.58	0.15	0.82	0.83	1.28	0.46	0	1.96	0	1.42	1.21	1.51	2.15	0.4	0.97	0	3.19	0			2.5	1.23	2.93	3.21	0.91	0.65	4.11	6.43	3.25
	2.99	0.56	1.74	1.08	0.24	0	0	2.66	0	2.09	0.18	1.27	1.3	0.29	1.68	0	2.44	0			2.58	0.15	0.91	0.83	1.28	0.46	0	1.99	0	1.42	1.21	1.51	2.15	0.4	0.97	0	3.19	0			2.5	1.23	3.14	3.21	1.41	0.65	4.11	6.43	3.25
	2.99	0.56	1.74	1.18	0.24	0	0	2.66	0	2.09	0.3	1.27	1.3	0.3	1.68	0	2.44	0			2.6	0.15	1.02	0.83	1.28	0.46	0	2.09	0	1.42	1.21	1.51	2.15	0.4	0.97	0	3.19	0			2.5	1.23	3.14	3.21	1.72	0.65	4.11	6.43	3.25
[truncated: 9 more columns]

## Sheet: Fig 5-Sfig 2D E F (Heat)
	30C mCherry-CNO									30C mCherry-Saline											22C mCherry-CNO									22C mCherry-Saline											14C mCherry-CNO
	0.569669	0.620632	0.498408	0.447756	0.179591	0.376861	chamber fail	0.473109	chamber fail	0.556656	0.52652	0.41833	0.550683	0.313575	0.227936	chamber fail	0.430103	chamber fail			0.626045	0.644017	0.495691	0.517319	0.229586	0.44616	chamber fail	0.541867	chamber fail	0.590704	0.747066	0.610963	0.512172	0.44071	0.334081	chamber fail	0.481262	chamber fail			0.7744	0.805296	0.697539	0.835806	0.656427	0.757743	0.909394	0.658572	0.821516
	0.487566	0.564197	0.466949	0.407302	0.441582	0.41151	0	0.482437	0	0.440827	0.553629	0.430133	0.513577	0.349995	0.438163	0	0.516722	0			0.596589	0.521331	0.583929	0.656725	0.520545	0.41616	0	0.627434	0	0.554843	0.666195	0.57935	0.585018	0.500442	0.594452	0	0.629	0			0.738344	0.727876	0.7209	0.762484	0.595801	0.621531	0.88861	0.810848	0.690182
	0.40566	0.549362	0.436908	0.417064	0.392571	0.523241	0	0.441932	0	0.418516	0.487866	0.448952	0.441277	0.35949	0.480135	0	0.538374	0			0.671096	0.484126	0.550367	0.515089	0.472101	0.464898	0	0.515486	0	0.57985	0.544214	0.569122	0.585001	0.443929	0.486407	0	0.522441	0			0.627954	0.825885	0.696102	0.682439	0.540811	0.707015	0.849444	0.822836	0.908329
	0.395888	0.536722	0.455504	0.429204	0.402577	0.345599	0	0.427196	0	0.412812	0.422749	0.421309	0.47313	0.364782	0.397856	0	0.485257	0			0.525779	0.503668	0.573229	0.489187	0.590821	0.48853	0	0.548943	0	0.531053	0.510589	0.556564	0.468077	0.353374	0.496182	0	0.559346	0			0.612687	0.956463	0.665302	0.668614	0.472453	0.669535	0.761841	0.726597	0.741084
	0.458466	0.502181	0.412928	0.391245	0.371635	0.33539	0	0.451215	0	0.483535	0.507256	0.371359	0.466634	0.294243	0.509496	0	0.466543	0			0.557051	0.495583	0.568123	0.463194	0.397664	0.498106	0	0.512359	0	0.580069	0.614931	0.517719	0.499408	0.32322	0.479572	0	0.523861	0			0.737451	0.721378	0.615264	0.583468	0.456279	0.563563	0.750943	0.747529	0.872774
	0.37761	0.495358	0.405503	0.440634	0.433122	0.389738	0	0.437949	0	0.426393	0.496662	0.475934	0.503644	0.299748	0.452184	0	0.513372	0			0.444446	0.572505	0.524069	0.571427	0.363058	0.417652	0	0.549214	0	0.466199	0.716864	0.477777	0.498558	0.339131	0.491224	0	0.531308	0			0.616225	0.737101	0.620982	0.610214	0.430957	0.549258	0.724804	0.749769	0.78436
	0.362454	0.46439	0.378312	0.263687	0.391838	0.317156	0	0.462794	0	0.336786	0.457621	0.377813	0.422448	0.333223	0.381948	0	0.537634	0			0.50223	0.436314	0.461871	0.457192	0.368211	0.472092	0	0.58138	0	0.55449	0.530429	0.538291	0.519844	0.282586	0.44285	0	0.541327	0			0.544701	0.782718	0.610057	0.596852	0.427201	0.639613	0.7803	0.815741	0.94003
	0.411926	0.385653	0.370702	0.22893	0.356867	0.36344	0	0.36006	0	0.332631	0.488077	0.401384	0.431529	0.278905	0.508398	0	0.427343	0			0.466468	0.383455	0.505642	0.449479	0.358114	0.322474	0	0.577415	0	0.580591	0.539525	0.469573	0.439471	0.319956	0.420287	0	0.535097	0			0.584897	0.701498	0.604323	0.467557	0.428641	0.55875	0.784311	0.687775	0.718003
	0.379173	0.510379	0.351944	0.209514	0.331282	0.265066	0	0.443414	0	0.375472	0.522718	0.352039	0.36182	0.283476	0.517722	0	0.486842	0			0.54618	0.313183	0.464472	0.35954	0.374072	0.326161	0	0.601068	0	0.442426	0.44382	0.448334	0.421487	0.32314	0.421631	0	0.629971	0			0.501255	0.685669	0.670495	0.520944	0.434165	0.525135	0.730324	0.695001	0.798167
	0.399937	0.462709	0.357551	0.212187	0.34083	0.224722	0	0.38299	0	0.236023	0.402237	0.32063	0.371878	0.216326	0.355555	0	0.547666	0			0.459437	0.279592	0.456739	0.385336	0.372161	0.355376	0	0.519721	0	0.403054	0.466788	0.461706	0.437854	0.313603	0.452519	0	0.574755	0			0.460138	0.685104	0.608421	0.511305	0.438895	0.49189	0.796781	0.835237	0.74246
	0.299906	0.500498	0.381743	0.229652	0.332476	0.313012	0	0.493735	0	0.2215	0.450008	0.262989	0.33257	0.229727	0.414931	0	0.486146	0			0.449047	0.304627	0.472959	0.380918	0.379837	0.393409	0	0.51595	0	0.411573	0.4749	0.429438	0.400543	0.303145	0.478537	0	0.53111	0			0.473552	0.783772	0.598443	0.526309	0.47884	0.61075	0.802726	0.748479	0.805017
	0.235923	0.508818	0.304349	0.188063	0.3168	0.263619	0	0.398507	0	0.252798	0.44744	0.211146	0.345853	0.189102	0.373785	0	0.391868	0			0.435757	0.485862	0.446888	0.407751	0.348994	0.371157	0	0.496359	0	0.296817	0.514035	0.418815	0.346889	0.29512	0.498256	0	0.524208	0			0.467204	0.58762	0.637139	0.473554	0.656212	0.460437	0.766324	0.668971	0.719981
	0.215025	0.363179	0.393284	0.182834	0.255153	0.218796	0	0.419735	0	0.27763	0.471152	0.201464	0.290654	0.208657	0.379993	0	0.426092	0			0.397379	0.42933	0.420355	0.389267	0.349222	0.341662	0	0.623727	0	0.276955	0.453718	0.333786	0.319879	0.322073	0.43297	0	0.595327	0			0.538006	0.535356	0.688121	0.491068	0.665938	0.42856	0.753217	0.799685	0.900759
	0.203514	0.430981	0.270541	0.303911	0.248764	0.190284	0	0.408169	0	0.363215	0.215577	0.192385	0.279063	0.188757	0.342772	0	0.355887	0			0.406703	0.413522	0.416237	0.385314	0.320287	0.333191	0	0.443615	0	0.498763	0.336109	0.370566	0.366356	0.335008	0.429582	0	0.547013	0			0.539606	0.496469	0.783011	0.616009	0.452679	0.525271	0.728796	0.631775	0.637556
	0.204783	0.389581	0.224358	0.377374	0.20878	0.223413	0	0.516145	0	0.22649	0.286178	0.179929	0.345504	0.191464	0.40759	0	0.413882	0			0.283145	0.444619	0.390684	0.419756	0.323381	0.348819	0	0.510997	0	0.382648	0.291557	0.360637	0.35997	0.3102	0.420218	0	0.511177	0			0.435649	0.586484	0.61213	0.708789	0.364435	0.454024	0.54941	0.748973	0.738633
	0.203899	0.454466	0.233313	0.36319	0.199138	0.155792	0	0.347518	0	0.195194	0.23689	0.175869	0.31166	0.190573	0.303216	0	0.379352	0			0.269805	0.438404	0.343702	0.364386	0.30886	0.368338	0	0.556038	0	0.297802	0.257494	0.335658	0.346323	0.321753	0.408191	0	0.511277	0			0.429141	0.548291	0.575749	0.595757	0.496763	0.588445	0.578435	0.672163	0.845546
	0.203819	0.318419	0.213167	0.315954	0.197307	0.20728	0	0.290358	0	0.213044	0.181237	0.193811	0.213165	0.167945	0.306383	0	0.367577	0			0.308531	0.420675	0.311839	0.343207	0.32755	0.334857	0	0.54529	0	0.270899	0.302158	0.331689	0.372206	0.330405	0.306168	0	0.515416	0			0.448554	0.503706	0.550252	0.53914	0.466223	0.455692	0.604109	0.622021	0.708369
	0.204432	0.310311	0.205158	0.416266	0.203374	0.206847	0	0.247862	0	0.204214	0.286729	0.178221	0.226944	0.180476	0.220912	0	0.527322	0			0.340761	0.236164	0.32732	0.351876	0.317818	0.401439	0	0.461762	0	0.311396	0.318281	0.365886	0.366684	0.288809	0.301337	0	0.521897	0			0.585074	0.582282	0.568673	0.472429	0.437459	0.443523	0.564509	0.695874	0.940188
	0.201868	0.27343	0.230676	0.32135	0.229017	0.191678	0	0.253138	0	0.226315	0.327557	0.179352	0.214423	0.25187	0.292647	0	0.385243	0			0.33525	0.385487	0.345564	0.368571	0.503422	0.336415	0	0.552882	0	0.305026	0.338512	0.530653	0.336417	0.365291	0.32673	0	0.52443	0			0.640198	0.533937	0.671781	0.530648	0.454937	0.414752	0.602711	0.673952	0.776319
	0.197318	0.269394	0.186834	0.235849	0.206787	0.201679	0	0.234878	0	0.17884	0.270892	0.176349	0.216101	0.269957	0.225163	0	0.331772	0			0.394927	0.388787	0.328949	0.375539	0.354017	0.456415	0	0.476115	0	0.31701	0.53033	0.523763	0.422819	0.547184	0.316152	0	0.515719	0			0.66968	0.588547	0.724184	0.511426	0.452771	0.477416	0.609807	0.672584	0.704424
	0.192778	0.245007	0.205294	0.209441	0.189916	0.205669	0	0.24785	0	0.205434	0.219624	0.170588	0.261035	0.230458	0.197203	0	0.280208	0			0.442042	0.290449	0.332903	0.389963	0.289507	0.394069	0	0.531764	0	0.468349	0.44849	0.515821	0.403623	0.375942	0.328417	0	0.536716	0			0.509314	0.594298	0.559683	0.589395	0.37476	0.519546	0.57974	0.734279	0.811742
	0.192426	0.277246	0.209127	0.228814	0.207203	0.192759	0	0.241323	0	0.262051	0.163147	0.245694	0.357487	0.240687	0.193596	0	0.194615	0			0.560338	0.339833	0.322162	0.333687	0.355073	0.402211	0	0.558846	0	0.401095	0.625394	0.396269	0.330545	0.311608	0.313173	0	0.514943	0			0.392287	0.557412	0.545514	0.511577	0.415951	0.550476	0.563941	0.643881	0.662089
	0.183963	0.249192	0.166912	0.208752	0.204316	0.186544	0	0.225899	0	0.300164	0.191297	0.325809	0.319048	0.212083	0.198418	0	0.198107	0			0.480308	0.331933	0.298588	0.348448	0.336848	0.365287	0	0.400622	0	0.431602	0.464677	0.309646	0.324753	0.265606	0.314217	0	0.550033	0			0.400294	0.604128	0.548767	0.498259	0.44569	0.544215	0.596035	0.641034	0.668564
	0.183012	0.245377	0.215323	0.199868	0.193946	0.287034	0	0.233118	0	0.272079	0.181436	0.342879	0.267912	0.169308	0.192125	0	0.206379	0			0.495423	0.437985	0.318106	0.342475	0.335053	0.35005	0	0.312588	0	0.275005	0.453767	0.285877	0.317384	0.312855	0.366788	0	0.570704	0			0.480794	0.764032	0.463186	0.524735	0.444656	0.470927	0.606582	0.724862	0.675337
	0.184469	0.253537	0.192392	0.184375	0.191604	0.377322	0	0.228234	0	0.381299	0.180299	0.313969	0.236721	0.185088	0.28231	0	0.205803	0			0.429556	0.442855	0.373145	0.377409	0.343971	0.416661	0	0.258722	0	0.280231	0.33738	0.326508	0.340708	0.320822	0.359529	0	0.586383	0			0.428583	0.783426	0.458376	0.506536	0.428806	0.431892	0.602768	0.633222	0.58741
	0.178572	0.267005	0.134689	0.20108	0.187278	0.360369	0	0.247579	0	0.268259	0.19201	0.348396	0.220618	0.178622	0.407869	0	0.19436	0			0.414449	0.424795	0.543671	0.308707	0.324915	0.329361	0	0.361249	0	0.272738	0.287196	0.352612	0.449754	0.313161	0.421235	0	0.496155	0			0.532262	0.886713	0.427707	0.670559	0.417807	0.516707	0.549882	0.62551	0.644547
	0.16473	0.25127	0.244365	0.18291	0.171681	0.298409	0	0.227063	0	0.311904	0.177326	0.39231	0.216956	0.17986	0.281111	0	0.196449	0			0.403783	0.350832	0.534104	0.318382	0.323404	0.271206	0	0.347637	0	0.310669	0.313437	0.359635	0.377846	0.317019	0.426451	0	0.59128	0			0.469733	0.826051	0.550973	0.564061	0.452029	0.473381	0.518758	0.858414	0.636835
	0.16689	0.234461	0.339271	0.194804	0.198805	0.24796	0	0.191404	0	0.222311	0.173339	0.34598	0.200118	0.168892	0.202353	0	0.26367	0			0.436758	0.39633	0.536915	0.356414	0.444778	0.298508	0	0.397823	0	0.304988	0.367343	0.324932	0.349011	0.310462	0.411079	0	0.423811	0			0.519478	0.719967	0.610416	0.513282	0.639772	0.485384	0.667908	0.610296	0.694406
	0.328067	0.245972	0.4095	0.206234	0.194172	0.249143	0	0.178964	0	0.290457	0.182184	0.372119	0.203795	0.169212	0.20481	0	0.288692	0			0.306809	0.46131	0.50033	0.316761	0.500113	0.338508	0	0.384708	0	0.325392	0.341732	0.369119	0.348085	0.29114	0.415414	0	0.52853	0			0.653775	0.765833	0.653264	0.518192	0.675002	0.491286	0.826303	0.628104	0.610532
	0.271915	0.234102	0.367207	0.185513	0.129242	0.194185	0	0.170869	0	0.231003	0.184159	0.38592	0.191905	0.184899	0.290373	0	0.380757	0			0.283774	0.39486	0.48335	0.321266	0.42157	0.444117	0	0.348196	0	0.316279	0.343186	0.334413	0.469822	0.391831	0.433248	0	0.576851	0			0.707999	0.76253	0.734244	0.511016	0.614341	0.433596	0.969822	0.685422	0.654008
	0.262154	0.273252	0.334912	0.178108	0.339763	0.179994	0	0.246296	0	0.246	0.181935	0.364283	0.202671	0.185339	0.40549	0	0.322002	0			0.333756	0.423051	0.420225	0.325885	0.453442	0.345132	0	0.331745	0	0.359532	0.353563	0.358923	0.650722	0.3368	0.375198	0	0.550055	0			0.768516	0.606392	0.540716	0.519015	0.624239	0.444611	0.778995	0.755091	0.604051
	0.351329	0.25724	0.346831	0.1829	0.401905	0.201941	0	0.20651	0	0.239142	0.154455	0.233876	0.198604	0.155539	0.234792	0	0.427709	0			0.347955	0.374906	0.482384	0.414147	0.445228	0.332776	0	0.461937	0	0.394061	0.345653	0.47578	0.56801	0.346296	0.381519	0	0.554497	0			0.583017	0.585548	0.450236	0.47152	0.638362	0.459115	0.718999	0.616243	0.589696
	0.291203	0.245873	0.312642	0.173988	0.379892	0.315172	0	0.192901	0	0.225258	0.16193	0.212725	0.245542	0.195982	0.199152	0	0.174584	0			0.348937	0.480446	0.412601	0.483864	0.37835	0.291605	0	0.430361	0	0.329867	0.336625	0.53031	0.602947	0.308693	0.256688	0	0.429106	0			0.630439	0.438057	0.404369	0.512044	0.517427	0.597838	0.64743	0.636363	0.591314
	0.460728	0.229728	0.258591	0.196192	0.383294	0.301295	0	0.191024	0	0.24506	0.16361	0.199233	0.33429	0.188034	0.214521	0	0.295404	0			0.349953	0.405257	0.434702	0.5707	0.29735	0.334707	0	0.303899	0	0.445966	0.338546	0.521313	0.476295	0.332662	0.268888	0	0.47245	0			0.566164	0.525851	0.437357	0.55469	0.465011	0.614826	0.523696	0.701136	0.72741
	0.479144	0.232036	0.247961	0.214934	0.29354	0.242884	0	0.21321	0	0.227411	0.172245	0.19136	0.331549	0.170589	0.226444	0	0.275616	0			0.378388	0.346796	0.368686	0.557578	0.278491	0.405716	0	0.310297	0	0.521333	0.307872	0.51771	0.455749	0.316477	0.313793	0	0.491099	0			0.660762	0.57891	0.414421	0.517704	0.546359	0.435653	0.665711	0.653547	0.829624
	0.252507	0.230796	0.228128	0.352854	0.364921	0.271165	0	0.23005	0	0.151515	0.16606	0.236637	0.305605	0.175273	0.203457	0	0.214467	0			0.420808	0.298004	0.299117	0.496561	0.247157	0.352821	0	0.319682	0	0.454836	0.291795	0.460617	0.443572	0.316304	0.293349	0	0.625059	0			0.4576	0.581407	0.454802	0.534502	0.477416	0.451713	1.02685	0.704921	0.774443
	0.269996	0.21358	0.22189	0.309543	0.299842	0.240027	0	0.394814	0	0.327008	0.163956	0.297414	0.423372	0.152592	0.215109	0	0.259948	0			0.315077	0.342129	0.317199	0.502153	0.329585	0.42764	0	0.4567	0	0.41035	0.302256	0.438354	0.457717	0.313374	0.282497	0	0.426453	0			0.419053	0.607779	0.482621	0.509158	0.45375	0.467689	0.75832	0.589557	0.748822
	0.289946	0.247611	0.208031	0.198817	0.36432	0.230407	0	0.30136	0	0.27308	0.19631	0.230477	0.280902	0.179029	0.205085	0	0.252511	0			0.301619	0.323928	0.346293	0.531073	0.355731	0.311672	0	0.291458	0	0.344001	0.309411	0.418963	0.394779	0.277436	0.282197	0	0.558865	0			0.32617	0.534011	0.448099	0.472104	0.460189	0.476427	0.599965	0.46663	0.768562
	0.296021	0.268048	0.215773	0.317657	0.332695	0.183464	0	0.28409	0	0.267395	0.171254	0.219472	0.339828	0.168124	0.191559	0	0.232348	0			0.339804	0.36745	0.323022	0.412606	0.360525	0.345658	0	0.34156	0	0.260697	0.338947	0.314847	0.325068	0.292016	0.340541	0	0.442317	0			0.356407	0.54394	0.438156	0.464059	0.464327	0.423284	0.56868	0.44299	0.615962
	0.246467	0.242769	0.197186	0.24086	0.334043	0.228163	0	0.317312	0	0.252923	0.170362	0.221863	0.242468	0.129133	0.220728	0	0.215455	0			0.328732	0.333271	0.322328	0.490267	0.397887	0.314642	0	0.312036	0	0.247463	0.333928	0.311919	0.314699	0.293834	0.276983	0	0.409864	0			0.375429	0.543034	0.485758	0.460999	0.468603	0.511167	0.467862	0.448768	0.526847
	0.345497	0.411624	0.198162	0.23957	0.26451	0.214576	0	0.314071	0	0.208976	0.171413	0.204624	0.251438	0.318859	0.352569	0	0.232917	0			0.335691	0.42482	0.340527	0.385332	0.31578	0.349138	0	0.326416	0	0.275591	0.353537	0.33956	0.326225	0.311173	0.30646	0	0.322499	0			0.328255	0.637307	0.452187	0.431837	0.465213	0.50275	0.546852	0.503465	0.528234
	0.275621	0.346806	0.337996	0.188892	0.2041	0.240021	0	0.245913	0	0.207976	0.16362	0.212077	0.212191	0.314807	0.227808	0	0.129532	0			0.342835	0.433534	0.336831	0.396615	0.298933	0.328738	0	0.517833	0	0.31089	0.310329	0.354015	0.32655	0.277047	0.426947	0	0.317535	0			0.380895	0.421559	0.445322	0.471799	0.493713	0.46148	0.58225	0.502502	0.649175
	0.231737	0.312818	0.408903	0.243887	0.203085	0.20037	0	0.238881	0	0.242395	0.191081	0.195502	0.210956	0.380713	0.1754	0	0.200147	0			0.317157	0.346237	0.332601	0.330814	0.349077	0.388854	0	0.476395	0	0.395568	0.409551	0.332997	0.335478	0.295376	0.392442	0	0.345097	0			0.462907	0.64123	0.628177	0.514552	0.440538	0.43179	0.637016	0.461688	0.619803
	0.262737	0.406719	0.310404	0.222052	0.198772	0.197944	0	0.245545	0	0.233274	0.163572	0.20372	0.204166	0.312605	0.236363	0	0.248636	0			0.326311	0.365526	0.31073	0.295748	0.364367	0.332319	0	0.557801	0	0.282396	0.427974	0.344545	0.374616	0.292593	0.325411	0	0.32271	0			0.470761	0.493818	0.65226	0.542943	0.591617	0.499591	0.620776	0.516803	0.603717
	0.297905	0.379192	0.339324	0.220816	0.216878	0.174043	0	0.220889	0	0.226502	0.157619	0.19153	0.20567	0.305598	0.151475	0	0.233001	0			0.318952	0.401828	0.305025	0.321947	0.281492	0.36852	0	0.449083	0	0.273422	0.323168	0.336965	0.290629	0.276182	0.279457	0	0.555662	0			0.347112	0.447726	0.628159	0.670488	0.375057	0.419526	0.611626	0.48122	0.668046
	0.241299	0.267853	0.418062	0.167578	0.18905	0.313399	0	0.241843	0	0.237954	0.282882	0.294951	0.206892	0.34154	0.123969	0	0.245373	0			0.304456	0.549436	0.28629	0.343876	0.310424	0.416269	0	0.469254	0	0.383798	0.366159	0.374051	0.316474	0.254661	0.299532	0	0.509447	0			0.321529	0.433225	0.717533	0.638684	0.50551	0.62915	0.625953	0.462554	0.596893
	0.301328	0.257237	0.349306	0.16617	0.182291	0.260283	0	0.218037	0	0.219657	0.326131	0.216137	0.202871	0.381842	0.376218	0	0.225381	0			0.310881	0.514201	0.314261	0.328069	0.308787	0.297242	0	0.479104	0	0.269797	0.410842	0.340169	0.377042	0.331115	0.297178	0	0.232368	0			0.361197	0.476317	0.65212	0.641194	0.534438	0.598476	0.630275	0.45855	0.600274
	0.261371	0.223096	0.226376	0.144454	0.198285	0.223561	0	0.231753	0	0.219088	0.316819	0.226042	0.252567	0.294384	0.254614	0	0.228158	0			0.365227	0.483766	0.463403	0.316363	0.35259	0.352548	0	0.480127	0	0.294696	0.38916	0.347511	0.35467	0.488724	0.299523	0	0.327432	0			0.382206	0.533833	0.559972	0.530036	0.631	0.598309	0.625035	0.523889	0.603934
	0.258281	0.240582	0.241365	0.375063	0.195561	0.227829	0	0.21783	0	0.20998	0.390846	0.209088	0.246567	0.348012	0.188661	0	0.228652	0			0.406132	0.632352	0.532571	0.326267	0.286165	0.351122	0	0.555051	0	0.296285	0.371372	0.327727	0.329725	0.524163	0.281848	0	0.315798	0			0.427305	0.573515	0.503008	0.536704	0.570844	0.628562	0.530459	0.870821	0.613679
[truncated: 9 more columns]
