# Supplementary material for: Cold-induced hyperphagia requires AgRP neuron activation in mice
Source: eLife journal article supplement (doi:10.7554/elife.58764), 2020-12-15
Supplement: supp [file elife-58764-supp-v1.zip › elife_poa_e58764_Figure_5_figure_supplement_3_source_data_1.xlsx]

## Sheet: Fig 5-Sfig 3 (RQ)
CNO-30C					Saline-30C						CNO-22C									Saline-22C											CNO-14C									Saline-14C
0.895621	0.849386	0.858703	0.886687	0.830856	0.813145	0.793338	0.805476	-0.3920808*	1.09958		0.799648	0.812125	0.844201	0.765883	0.893138	0.92	0.921	0.828	0.94	0.828018	0.827253	0.80723	0.7564	0.886455	0.86	0.845	0.897	0.887			0.886455	0.86	0.845	0.897	0.887	0.896	0.923	0.901	0.801	0.865163	0.767584	0.82712	0.819105	0.918942	0.837	0.867	0.987	0.908
0.786585	0.885129	0.832117	0.870859	0.811573	0.814622	0.798101	0.876783	0.735522	0.826412		0.766522	0.813501	0.861113	0.797228	0.905265	0.838	0.829	0.821	0.85	0.807194	0.837034	0.855628	0.781439	0.923234	0.832	0.786	0.795	0.812			0.923234	0.832	0.786	0.795	0.812	0.817	0.845	0.826	0.813	0.813408	0.859803	0.82373	0.929462	0.881846	0.834	0.812	0.857	0.861
0.798401	0.861942	0.887275	0.872692	0.827764	0.814106	0.777589	0.864644	0.810748	0.856652		0.799471	0.874393	0.867888	0.786603	0.896316	0.861	0.869	0.802	0.847	0.879926	0.819312	0.84132	0.835304	0.919195	0.834	0.804	0.769	0.805			0.919195	0.834	0.804	0.769	0.805	0.814	0.815	0.826	0.815	0.821666	0.825943	0.829654	0.788936	0.887285	0.837	0.793	0.799	0.804
0.861379	0.934323	0.878228	0.87472	0.825795	0.783748	0.822125	0.867741	0.806715	0.869165		0.781811	0.788518	0.893719	0.83672	0.894886	0.902	0.868	0.828	0.855	0.858128	0.843	0.869212	0.82356	0.925498	0.866	0.818	0.787	0.827			0.925498	0.866	0.818	0.787	0.827	0.833	0.874	0.82	0.816	0.830913	0.863326	0.845778	0.788853	0.88175	0.837	0.795	0.833	0.834
0.778989	0.885448	0.80714	0.876006	0.847792	0.870055	0.758861	0.870194	0.805971	0.837831		0.806329	0.847614	0.902699	0.816059	0.919877	0.91	0.888	0.821	0.848	0.827864	0.876515	0.802031	0.842445	0.898459	0.85	0.815	0.79	0.827			0.898459	0.85	0.815	0.79	0.827	0.819	0.823	0.816	0.785	0.820497	0.854832	0.863516	0.797373	0.878856	0.813	0.822	0.861	0.834
0.79152	0.818297	0.812894	0.858954	0.820409	0.839356	0.771118	0.803667	0.814946	0.847262		0.795384	0.844903	0.974837	0.804944	0.912366	0.862	0.903	0.89	0.849	0.825346	0.844227	0.787649	0.835867	0.891896	0.852	0.806	0.797	0.811			0.891896	0.852	0.806	0.797	0.811	0.817	0.839	0.833	0.789	0.837425	0.810207	0.890831	0.820309	0.861426	0.823	0.775	0.864	0.823
0.776232	0.897911	0.840718	0.880808	0.8371	0.4315844*	0.807563	0.852597	0.841863	0.836996		0.809251	0.807205	0.969813	0.789385	0.923461	0.859	0.892	0.827	0.855	0.815276	0.947569	0.802428	0.782296	0.879843	0.86	0.819	0.81	0.825			0.879843	0.86	0.819	0.81	0.825	0.828	0.834	0.823	0.812	0.846419	0.887816	0.891104	0.955091	0.879705	0.826	0.832	0.88	0.848
0.786141	0.879543	0.851205	0.856791	0.810793	0.866655	0.1272762*	0.832396	0.803169	0.777303		0.822972	0.796716	0.956126	0.814375	0.918856	0.798	0.847	0.862	0.846	0.778716	0.897921	0.782097	0.807805	0.900243	0.842	0.785	0.815	0.757			0.900243	0.842	0.785	0.815	0.757	0.794	0.836	0.816	0.793	0.881673	0.822009	0.884717	0.895682	0.910891	0.802	0.827	0.849	0.795
0.897532	0.865148	0.827414	0.864748	0.828016	0.786858	0.730561	0.827212	0.829592	0.788237		0.791945	0.786504	0.915323	0.812158	0.912185	0.798	0.849	0.895	0.842	0.847549	0.935382	0.769972	0.766334	0.84622	0.808	0.787	0.769	0.791			0.84622	0.808	0.787	0.769	0.791	0.808	0.794	0.813	0.796	0.815593	0.812443	0.92216	0.788903	0.908683	0.812	0.809	0.839	0.81
0.808119	0.922813	0.822542	0.840455	0.796049	0.822753	0.752837	0.813479	0.832246	0.820598		0.82185	0.815891	0.93528	0.852582	0.898643	0.8	0.822	0.855	0.834	0.845061	0.926902	0.806954	0.758561	0.808236	0.8	0.785	0.768	0.768			0.808236	0.8	0.785	0.768	0.768	0.797	0.798	0.828	0.773	0.812677	0.783497	0.930488	0.827661	0.881141	0.82	0.794	0.848	0.823
0.803581	0.908026	0.833991	0.939133	0.914492	0.793143	0.748915	0.846272	0.888447	0.7803		0.802123	0.735831	0.851415	0.856199	0.914523	0.831	0.821	0.845	0.793	0.837048	0.883911	0.797952	0.750001	0.832264	0.805	0.806	0.783	0.819			0.832264	0.805	0.806	0.783	0.819	0.828	0.786	0.848	0.758	0.823742	0.773091	0.946489	0.791529	0.884255	0.767	0.853	0.834	0.83
0.784327	0.92567	0.874937	0.89101	0.800243	0.719518	0.741586	0.755616	0.804825	0.777203		0.749838	0.810791	0.864762	0.877635	0.916706	0.844	0.834	0.831	0.821	0.80631	0.867549	0.829122	0.732894	0.84673	0.799	0.787	0.769	0.775			0.84673	0.799	0.787	0.769	0.775	0.798	0.786	0.828	0.768	0.794458	0.818251	0.960494	0.806011	0.841576	0.764	0.832	0.819	0.83
0.818694	0.892074	0.839261	0.874217	0.798795	0.819608	0.838817	0.863339	0.775507	0.843456		0.755458	0.825309	0.831165	0.844873	0.855398	0.862	0.811	0.813	0.811	0.799176	0.833393	0.790598	0.763863	0.850422	0.8	0.8	0.815	0.79			0.850422	0.8	0.8	0.815	0.79	0.791	0.818	0.804	0.765	0.797241	0.813749	0.919095	0.848105	0.819059	0.815	0.836	0.798	0.834
0.811561	0.874479	0.862778	0.938722	0.769439	0.784223	0.809496	0.826877	0.842747	0.798851		0.774323	0.849516	0.834363	0.860549	0.812911	0.833	0.861	0.855	0.807	0.774007	0.830069	0.830239	0.797475	0.83662	0.817	0.805	0.789	0.788			0.83662	0.817	0.805	0.789	0.788	0.847	0.81	0.817	0.767	0.765679	0.79628	0.893786	0.814259	0.883448	0.808	0.841	0.792	0.811
0.816839	0.802449	0.818228	0.931516	0.774366	0.787982	0.817779	0.885949	0.845194	0.805055		0.778441	0.823865	0.789265	0.841289	0.807602	0.786	0.81	0.847	0.806	0.822699	0.834157	0.832379	0.828575	0.824787	0.849	0.819	0.784	0.823			0.824787	0.849	0.819	0.784	0.823	0.812	0.835	0.811	0.797	0.806621	0.792024	0.857202	0.742627	0.837138	0.803	0.901	0.824	0.792
0.796156	0.941225	0.865667	0.87328	0.804995	0.854851	0.745784	0.825715	0.826253	0.747436		0.801794	0.849959	0.781378	0.820562	0.806499	0.817	0.846	0.826	0.826	0.840457	0.788544	0.80893	0.809569	0.828646	0.8	0.801	0.764	0.791			0.828646	0.8	0.801	0.764	0.791	0.802	0.815	0.805	0.789	0.745065	0.761821	0.763323	0.858416	0.842153	0.779	0.87	0.792	0.762
0.801115	0.910951	0.834746	0.929868	0.851993	0.81156	0.762847	0.8795	0.825221	0.7155		0.796719	0.864472	0.803451	0.786947	0.761864	0.842	0.839	0.807	0.796	0.835611	0.773349	0.758711	0.812463	0.822671	0.815	0.829	0.794	0.799			0.822671	0.815	0.829	0.794	0.799	0.807	0.876	0.805	0.794	0.707971	0.757796	0.757133	0.806736	0.84719	0.755	0.857	0.8	0.778
0.783917	0.87232	0.76635	1.05886	0.802139	0.809415	0.778542	0.876095	0.836209	0.818613		0.839199	0.81778	0.81397	0.730045	0.831202	0.805	0.844	0.805	0.808	0.862965	0.749037	0.851619	0.859226	0.839666	0.839	0.83	0.801	0.798			0.839666	0.839	0.83	0.801	0.798	0.804	0.882	0.811	0.774	0.788223	0.778808	0.793247	0.823931	0.850109	0.844	0.939	0.79	0.764
0.785601	0.829815	0.919826	0.853238	0.824377	0.832125	0.813475	0.835712	0.893436	0.804595		0.834523	0.868129	0.809964	0.797119	0.879526	0.875	0.848	0.806	0.799	0.903489	0.798637	0.844559	0.86634	0.843519	0.846	0.793	0.781	0.819			0.843519	0.846	0.793	0.781	0.819	0.821	0.875	0.832	0.78	0.788664	0.748156	0.844157	0.793222	0.821316	0.823	0.865	0.81	0.752
0.751901	0.938267	0.845409	0.867033	0.790267	0.815225	0.814972	0.7719	0.843222	0.857314		0.847347	0.818623	0.832064	0.738618	0.841917	0.846	0.791	0.827	0.806	0.830943	0.780139	0.834805	0.833351	0.871198	0.805	0.923	0.785	0.807			0.871198	0.805	0.923	0.785	0.807	0.823	0.895	0.823	0.784	0.801579	0.811101	0.851995	0.837418	0.849986	0.782	0.8	0.82	0.763
0.778919	0.853942	0.820088	0.762372	0.731734	0.858806	0.776465	0.799653	0.781384	0.796563		0.906869	0.86651	0.790428	0.702713	0.803524	0.777	0.827	0.844	0.742	0.850243	0.76028	0.869188	0.797419	0.846424	0.796	0.893	0.802	0.801			0.846424	0.796	0.893	0.802	0.801	0.819	0.868	0.796	0.771	0.774627	0.806737	0.857029	0.787646	0.849322	0.764	0.804	0.842	0.808
0.766626	0.873926	0.887848	0.907279	0.814861	0.843313	0.819521	0.745828	0.775949	0.780376		0.861336	0.877213	0.802399	0.767692	0.855078	0.784	0.831	0.83	0.736	0.907233	0.798273	0.831349	0.867838	0.884047	0.843	0.892	0.804	0.831			0.884047	0.843	0.892	0.804	0.831	0.813	0.881	0.788	0.757	0.796439	0.792114	0.86682	1.00815	0.857116	0.771	0.845	0.851	0.807
0.75857	0.929514	0.872699	0.85711	0.883311	0.828526	0.874931	0.887975	0.842614	0.842291		0.826088	0.886451	0.85083	0.755132	0.797866	0.766	0.796	0.819	0.748	0.876703	0.75824	0.839192	0.839499	0.826578	0.775	0.798	0.771	0.813			0.826578	0.775	0.798	0.771	0.813	0.808	0.825	0.8	0.759	0.903639	0.792608	0.90332	0.851595	0.812687	0.763	0.89	0.827	0.829
0.755059	0.872925	0.948848	0.841784	0.826997	0.812928	0.846561	0.860706	0.837892	0.796157		0.824835	0.861712	0.836846	0.762683	0.842851	0.79	0.808	0.854	0.814	0.870373	0.770443	0.829404	0.815885	0.881263	0.803	0.868	0.78	0.869			0.881263	0.803	0.868	0.78	0.869	0.789	0.854	0.807	0.76	0.814946	0.811557	0.916048	0.866296	0.856878	0.798	0.855	0.89	0.823
0.750805	0.867214	0.890011	0.881286	0.802413	0.785809	0.797946	0.68759	0.857639	0.790623		0.859574	0.619683	0.912064	0.740327	0.883457	0.812	0.795	0.851	0.718	0.841438	0.748773	0.842261	0.790456	0.902744	0.792	0.837	0.79	0.782			0.902744	0.792	0.837	0.79	0.782	0.801	0.816	0.813	0.75	0.824335	0.775092	0.919052	0.831848	0.836117	0.771	0.817	0.893	0.839
0.759765	0.894576	0.84137	0.886557	0.817272	0.772415	0.821402	0.908381	0.855459	0.784059		0.802363	0.847415	0.928821	0.738966	0.845451	0.839	0.819	0.81	0.762	0.847347	0.806618	0.87543	0.807277	0.881923	0.762	0.802	0.779	0.814			0.881923	0.762	0.802	0.779	0.814	0.794	0.834	0.803	0.75	0.806459	0.758238	0.853787	0.872008	0.887052	0.765	0.806	0.853	0.819
0.691236	0.895266	0.879794	0.954513	0.770219	0.834814	0.894033	0.857304	0.82987	0.877635		0.776795	0.87367	0.896868	0.707103	0.809922	0.825	0.803	0.809	0.778	0.818865	0.764163	0.912007	0.792824	0.886513	0.817	0.796	0.781	0.774			0.886513	0.817	0.796	0.781	0.774	0.812	0.823	0.786	0.761	0.829524	0.794539	0.882906	0.926244	0.886875	0.807	0.843	0.854	0.808
0.768853	0.912484	0.876181	0.938428	0.821997	0.787947	0.897739	0.804865	0.843749	0.847652		0.792919	0.861093	0.92571	0.753749	0.806912	0.827	0.78	0.797	0.782	0.76502	0.829379	0.857061	0.776425	0.843096	0.782	0.811	0.803	0.805			0.843096	0.782	0.811	0.803	0.805	0.774	0.814	0.796	0.77	0.853314	0.829165	0.87143	0.87679	0.84859	0.819	0.83	0.795	0.786
0.818434	0.943289	0.855981	0.907296	0.828354	0.770208	0.769059	0.924165	0.785	0.924475		0.775987	0.863606	0.964794	0.753187	0.873007	0.83	0.77	0.786	0.818	0.815526	0.859684	0.856647	0.763102	0.866808	0.818	0.787	0.791	0.805			0.866808	0.818	0.787	0.791	0.805	0.794	0.828	0.783	0.762	0.848421	0.785983	0.796407	0.820319	0.885835	0.81	0.827	0.793	0.824
0.763922	1.01527	0.894953	0.93767	0.820892	0.790592	0.784316	0.898163	0.828753	0.820897		0.820857	0.839734	0.964968	0.762078	0.832189	0.836	0.854	0.802	0.805	0.794828	0.870668	0.899572	0.837293	0.942712	0.759	0.86	0.764	0.775			0.942712	0.759	0.86	0.764	0.775	0.819	0.816	0.803	0.761	0.86638	0.766667	0.797932	0.823973	0.909921	0.823	0.839	0.798	0.776
0.748139	0.934515	0.805406	0.921282	0.847997	0.811851	0.805495	0.877105	0.839129	0.783544		0.88449	0.8275	0.961441	0.777729	0.738215	0.868	0.847	0.78	0.742	0.813738	0.925881	0.82702	0.885386	0.903835	0.803	0.788	0.757	0.767			0.903835	0.803	0.788	0.757	0.767	0.788	0.778	0.803	0.761	0.83103	0.835753	0.794422	0.799123	0.9394	0.779	0.805	0.797	0.756
0.735508	0.91973	0.808206	0.95876	0.792255	0.865934	0.797099	0.824167	0.854389	0.768753		0.836457	0.803092	0.940451	0.812885	0.828743	0.875	0.853	0.779	0.731	0.836004	0.934289	0.800856	0.831652	0.922838	0.805	0.864	0.805	0.777			0.922838	0.805	0.864	0.805	0.777	0.782	0.834	0.808	0.807	0.828854	0.819142	0.818224	0.796059	0.961225	0.799	0.77	0.802	0.752
0.802628	0.941043	0.856363	0.997418	0.772088	0.762873	0.786275	0.845195	0.926721	0.84228		0.854414	0.803107	0.954153	0.88195	0.895806	0.908	0.84	0.794	0.718	0.80018	0.930818	0.800374	0.868484	0.856146	0.844	0.843	0.748	0.748			0.856146	0.844	0.843	0.748	0.748	0.796	0.833	0.812	0.795	0.799948	0.893785	0.814936	0.911582	0.92454	0.795	0.803	0.818	0.762
0.873124	0.965679	0.828957	0.932563	0.777542	0.778338	0.805783	0.848291	0.813457	0.790712		0.823808	0.831694	0.926116	0.87191	0.811201	0.846	0.87	0.791	0.783	0.833128	0.937573	0.840282	0.900148	0.858701	0.807	0.889	0.749	0.801			0.858701	0.807	0.889	0.749	0.801	0.803	0.826	0.804	0.814	0.819719	0.859236	0.82224	0.806345	0.910622	0.772	0.795	0.793	0.757
0.781237	1.02794	0.832042	0.970411	0.751594	0.836348	0.817444	0.85642	0.799203	0.637038		0.8017	0.861279	0.857165	0.895637	0.826644	0.863	0.849	0.772	0.751	0.859719	0.912175	0.826762	0.859673	0.841789	0.832	0.854	0.753	0.741			0.841789	0.832	0.854	0.753	0.741	0.81	0.814	0.791	0.826	0.813322	0.871479	0.819373	0.753757	0.861039	0.764	0.802	0.822	0.75
0.770994	0.967439	0.720506	0.945076	0.825436	0.833835	0.794456	0.837605	0.942093	0.781511		0.764282	0.67257	0.860901	0.858429	0.831499	0.861	0.858	0.784	0.724	0.794332	0.941378	0.804325	0.832004	0.833827	0.802	0.888	0.753	0.766			0.833827	0.802	0.888	0.753	0.766	0.802	0.832	0.793	0.832	0.790643	0.920106	0.794092	0.78842	0.858711	0.762	0.797	0.807	0.763
0.780938	0.964425	0.81612	1.01668	0.807937	0.846046	0.871875	0.934328	0.831452	0.776315		0.81964	0.837622	0.8504	0.852776	0.769198	0.863	0.797	0.785	0.736	0.785644	0.881291	0.808601	0.812165	0.827304	0.844	0.881	0.772	0.798			0.827304	0.844	0.881	0.772	0.798	0.792	0.815	0.798	0.834	0.805472	0.91218	0.801215	0.807686	0.845861	0.757	0.781	0.803	0.747
0.736533	0.946184	0.837845	0.971005	0.805465	0.813584	0.838826	0.87242	0.841286	0.778405		0.900151	0.876233	0.841521	0.816161	0.884094	0.806	0.771	0.78	0.729	0.795419	0.8979	0.821953	0.775076	0.815013	0.773	0.844	0.759	0.754			0.815013	0.773	0.844	0.759	0.754	0.804	0.832	0.793	0.814	0.797749	0.888403	0.779201	0.721739	0.876874	0.734	0.83	0.801	0.774
0.743121	1.0218	0.867931	0.841959	0.770815	0.875043	0.854207	0.925217	0.898998	0.775004		0.792593	0.881731	0.8748	0.852101	0.847502	0.846	0.745	0.805	0.73	0.81249	0.847902	0.822424	0.785015	0.841288	0.78	0.861	0.798	0.77			0.841288	0.78	0.861	0.798	0.77	0.784	0.81	0.786	0.777	0.814215	0.860428	0.846986	0.800074	0.917145	0.748	0.826	0.798	0.8
0.844888	1.07655	0.917266	0.988769	0.805443	0.834306	0.811737	0.912356	0.902882	0.77411		0.83386	0.862233	0.867001	0.792902	0.829229	0.809	0.789	0.787	0.733	0.8475	0.853483	0.789501	0.765048	0.812263	0.814	0.837	0.762	0.763			0.812263	0.814	0.837	0.762	0.763	0.797	0.873	0.754	0.775	0.808643	0.901285	0.814628	0.793367	0.856776	0.76	0.812	0.793	0.817
0.803564	1.02174	0.805714	0.861188	0.806067	0.907581	0.766708	0.948902	0.927038	0.759499		0.82666	0.68794	0.881756	0.829863	0.903056	0.787	0.802	0.811	0.76	0.875499	0.867474	0.716697	0.772732	0.800871	0.768	0.91	0.774	0.81			0.800871	0.768	0.91	0.774	0.81	0.791	0.871	0.788	0.777	0.782771	0.863918	0.82119	0.77425	0.817918	0.77	0.864	0.823	0.834
0.4635355*	0.848128	0.834605	0.903696	0.776506	0.867974	0.777627	0.921636	0.846244	0.765966		0.83279	0.758164	0.86888	0.831951	0.837999	0.797	0.811	0.819	0.761	0.920683	0.868164	0.931999	0.781197	0.798098	0.765	0.829	0.751	0.774			0.798098	0.765	0.829	0.751	0.774	0.809	0.836	0.777	0.79	0.78702	0.831241	0.802563	0.782288	0.839374	0.741	0.877	0.799	0.862
0.814259	1.0305	0.825893	0.995746	0.822411	0.781263	0.919382	0.926546	0.828717	0.768549		0.876833	0.755842	0.894369	0.872035	0.880661	0.771	0.764	0.795	0.712	0.935911	0.88727	0.754782	0.785054	0.795495	0.743	0.843	0.784	0.753			0.795495	0.743	0.843	0.784	0.753	0.79	0.897	0.781	0.777	0.740009	0.860188	0.782916	0.794978	0.827954	0.745	0.909	0.871	0.884
0.832222	0.943328	0.776986	0.876406	0.824076	0.898421	0.911939	0.895139	0.85174	0.794207		0.884902	0.760491	0.939686	0.824338	0.899874	0.8	0.756	0.804	0.76	0.864049	0.898566	0.846239	0.792902	0.833965	0.738	0.819	0.768	0.775			0.833965	0.738	0.819	0.768	0.775	0.768	0.834	0.762	0.757	0.750602	0.829461	0.856107	0.818833	0.855363	0.731	0.882	0.833	0.882
0.824593	0.9411	0.816908	0.925724	0.771532	0.90486	0.816474	0.870418	0.850538	0.849899		0.826274	0.726081	0.954835	0.837838	0.913249	0.775	0.798	0.788	0.692	0.883732	0.868624	0.786616	0.745208	0.7704	0.77	0.806	0.78	0.73			0.7704	0.77	0.806	0.78	0.73	0.771	0.885	0.792	0.813	0.762041	0.820054	0.787957	0.791971	0.845734	0.788	0.823	0.868	0.834
0.844205	0.978288	0.806527	0.908741	0.838665	1.06726	0.853749	0.897083	0.835488	0.862177		0.855321	0.742764	1.00747	0.825835	0.896067	0.785	0.818	0.771	0.762	0.896935	0.939955	0.806861	0.841793	0.779377	0.747	0.856	0.774	0.771			0.779377	0.747	0.856	0.774	0.771	0.757	0.878	0.784	0.774	0.800918	0.859515	0.851229	0.928691	0.889697	0.778	0.876	0.896	0.818
0.949252	0.913872	0.846235	0.90584	0.83283	0.943921	0.838955	0.886226	0.841322	0.846785		0.861011	0.734069	0.942395	0.805341	0.948579	0.771	0.772	0.763	0.775	0.87171	0.978789	0.832095	0.79823	0.7764	0.798	0.844	0.834	0.768			0.7764	0.798	0.844	0.834	0.768	0.774	0.831	0.79	0.772	0.805254	0.793677	0.924696	0.8015	0.872016	0.79	0.876	0.874	0.779
0.965265	0.878348	0.854593	0.899552	0.771167	0.908537	0.803356	0.804701	0.909882	0.734267		0.7965	0.804743	0.878581	0.8221	0.901599	0.795	0.795	0.761	0.809	0.804601	0.943245	0.835713	0.86781	0.781342	0.791	0.797	0.794	0.781			0.781342	0.791	0.797	0.794	0.781	0.78	0.86	0.783	0.83	0.837448	0.963702	0.951028	0.809838	0.855239	0.75	0.834	0.81	0.801
0.910528	0.989795	0.870535	0.873417	0.827379	0.856341	0.788631	0.801393	0.896	0.718515		0.840503	0.742563	0.90517	0.817583	0.888326	0.853	0.777	0.787	0.75	0.885532	0.935319	0.785388	0.926988	0.79323	0.784	0.81	0.813	0.825			0.79323	0.784	0.81	0.813	0.825	0.761	0.824	0.818	0.812	0.843734	0.815463	0.908654	0.769391	0.89314	0.751	0.794	0.812	0.8

## Sheet: Fig 5-Sfig 3 (Activity)
CNO-30C					Saline-30C						CNO-22C									Saline-22C										CNO-14C									Saline 14C
0	0	0	0	0	0	0	0	0	0		0	0	0	0	0	251.2	302.2	237.6	136.333	0	0	0	0	0	246.867	319	141.267	182.533		0	0	0	0	0	0	0	0	0	0	0	0	0	0	0	0	0	0
102.2	288.667	172	84.7333	159.267	276.267	209.467	271.467	0	0		215.667	128.5	357.2	475.933	339.6	577.4	633.333	714.688	406	313	334	300	0	0	443.133	547.267	555.467	567.933		275.4	305.07	387	360.8	261.93	206.467	291.2	214.2	233	414.33	337	329.93	347.27	371.53	496.067	496.533	234.067	183.867
442	545.133	471.867	477.533	573.6	596.6	466.067	599.267	256.133	365.667		405.067	476.3	649	892	724.4	900.2	968.067	1097.8	659.2	503	637	395	332	376	653.467	695.533	869.667	868.333		657.47	575.67	758.73	768.8	538.2	529.933	610.733	435.6	351.8	774.27	704.06	578.33	693.73	716.53	918.667	868.067	635.733	414.2
791.333	690.933	816.067	762.933	964	933.667	712	829.133	614	730.467		590.6	880.4	892.666	1353.53	1054.73	1205.87	1237.73	1426.33	909.2	603	1015	413	612	738	886.533	927.333	1136.07	1176.13		1036.74	932.07	1061.6	1084.8	833.73	831.867	967.867	664	416	1114.93	1086.73	864.33	880.73	1081.2	1164.73	1223.8	996.867	574
1243	864	1103.6	1044.33	1369.4	1229.07	934.467	1110.8	943.133	1072.13		837.2	995.7	1173.53	1762.67	1360.2	1470.93	1430.6	1775.2	1114	668	1244	416	841	1048	1127.4	1052.13	1318	1465.07		1335.34	1243.73	1331.2	1384.53	921.6	1099.53	1253.07	784	520	1462.07	1400.4	1198	1111.33	1414.07	1441.27	1579.93	1315.33	816.133
1552.4	884	1342	1154	1717.2	1432.33	1095	1378.27	1218	1410.2		1008.73	1046	1425.53	2247.33	1658.53	1705.87	1615.47	1987.27	1430.47	691	1502	425	1131	1382	1298	1194	1678.87	1729.53		1649.87	1522.47	1632.13	1731.6	929.07	1375.87	1526.4	856	618.733	1747.2	1721	1521.87	1432.93	1754.53	1740.2	1867.67	1740.67	1089
1845.27	884	1538.53	1218.27	2000	1704.6	1249.4	1480.6	1466	1771.67		1097.47	1046	1595.53	2538.13	2004	1888.27	1930.6	2340	1690.93	727	1758	425	1366	1648	1452	1251.47	1910	1876		1903.6	1718.67	1838.4	2052.4	939.07	1548	1834.67	995.333	712.8	2064.2	2039.06	1789.33	1691.6	2009.87	2028.67	2181.8	2153.07	1293.93
1992.4	910	1671	1256	2286.8	1937	1312	1501	1714.2	2115.4		1107.13	1097.9	1688.67	2909.93	2238.2	1950	2122	2523.27	1822	734	1949	437	1524	1945	1609.2	1294	2040.93	1878.2		2045.4	1924.2	2170.93	2350.8	1000.07	1683	2140	1084	804	2434.47	2378.13	2060.67	1882	2375.2	2309	2532.8	2499.67	1634
2020	910	1772	1256	2560	1986	1342	1501	1942	2261.87		1111.13	1133.1	1752.07	3252.87	2518	1950	2248	2734	1825	793	2048	452	1697	2128	1765.53	1351	2104	1979.27		2161.87	2012.73	2263.86	2478.6	1035.07	1883.33	2382.07	1112	851.867	2600.07	2658.13	2300.33	1986.8	2612.13	2623.2	2789.67	2894.67	1849.87
2057	910	1788	1260	2570	2149	1342	1501	2189.13	2388		1131.6	1172	1796.53	3725.6	2756	1950	2248	2880	1827	866	2052	459	1875	2188	1813	1354	2176	1998		2185.87	2162.6	2407.2	2623.4	1041.07	1962	2658.13	1128.07	880	2920.53	2797.13	2350.33	1987.8	2669.93	2841.13	3069.93	3245.67	2103.53
2058	917	1788	1270	2584	2199	1356	1501	2240	2389		1238.13	1172	1797.53	4048.93	2950	1974	2348	2910	1858	875	2094	459	1956	2316	1847	1357.87	2194	2015		2272.87	2269.47	2496.2	2652.4	1063.07	1962	2756	1323.13	897	3125.33	2884.13	2467.07	1989.8	2823.13	3080.47	3394	3498.93	2421.53
2070	919	1793	1272	2593.33	2234	1356	1501	2404.67	2396		1250.13	1184	1811.53	4405.87	3171.53	2006	2350	2923	1891.47	904	2141	464	2054	2336	1951	1394	2206	2036		2272.87	2302.07	2681	2678.4	1107.27	2042.4	2874	1574.2	900	3333.27	2886.13	2673.4	1994.8	2847.2	3261	3656.4	3683.93	2614.27
2077	919	1793	1272	2758	2260	1356	1501	2416	2400		1284.13	1189	1815.53	4790.67	3224.93	2034.07	2369.27	2930	1942	913	2141	464	2070	2362	1968	1400	2392.27	2054		2307.87	2382.47	2756.2	2699.4	1390.07	2055	2895	1738	908	3453.13	2955.86	2724.33	1994.8	2887.2	3582.93	3985.27	3777	2896.8
2158	919	1802	1272	2766	2305.4	1358	1522	2448.2	2522		1442.13	1230	1815.53	4930.93	3386	2060	2408	3120	1987	923	2170	467	2142	2362	1984	1407	2504.87	2074		2408.87	2386.47	2790.2	2781.27	1421.07	2060.13	2921.93	1744	908	3473.13	2956.13	2773.33	2006.8	2927.2	3904.93	4302.6	3797	3103.13
2160	920	1802	1307	2766	2332	1408	1528	2470	2534		1466.13	1272.4	1853.53	5056.33	3475	2065	2412	3265.47	2022	932	2193	467	2218	2382	1990	1414	2544	2104		2460.87	2436.47	2796.2	2887.33	1505.07	2128.73	3120.93	1770	914	3499.07	2974.13	2773.33	2051.8	2962.2	3995	4670.73	3802	3347
2339.4	920	1802	1314	2770	2446.73	1491.8	1698.73	2497.07	2636		1559.6	1304	1854.53	5236.93	3486	2176.2	2435	3373	2031.4	939	2200	467	2422	2382	2010	1436	2555	2119		2483.87	2449.47	2816.2	3077.4	1521.13	2154	3197.4	1779	916	3527.13	3000.13	2789.33	2225.4	2989.2	4113.33	4959.4	3954.93	3541.07
2411.33	940	1802	1318	2807.53	2629.4	1568	1778	2760.33	2638		1588.13	1313	2095.47	5266.93	3487	2491.8	2450	3384	2040	941	2206	469	2589	2404	2017	1488.13	2611	2131		2527.87	2466.47	2839.2	3187.4	1583	2170	3423.6	1842.27	939	3531.13	3017.13	2806.33	2311.53	3144.6	4194	5278.87	4000	3568
2621.87	940	1802	1324	2830	2852	1588	1821.67	2962.67	2705.27		1592.13	1414.6	2152.53	5269.93	3514	2758.47	2492	3396	2063	1050	2258	469	2836	2430	2155.87	1803.87	2679	2144.67		2575.87	2485.47	2861.8	3204.4	1660.87	2180.53	3591.4	2108.4	1006.27	3556.13	3067.13	2829.33	2402.8	3271.2	4194	5726.67	4012.13	3709.13
2790.27	943	1802	1324	2831	2996.53	1589	1856	3086	2811.93		1605.13	1535	2519.27	5369.73	3566	3010.93	2550	3404.87	2080	1300	2264	469	3036	2430	2352.67	1973.53	2682	2174		2694.53	2485.47	2916.2	3205.4	1759.07	2227	3941.47	2167	1058	3576.13	3099.33	2880.33	2472.8	3317.2	4210	5997.87	4033	3752
2942	948	1828	1328	2869.6	3118	1617	1864	3261.93	2812		1636.8	1540	2858.67	5412.93	3665	3236	2576	3462	2121.93	1577	2288	471	3079	2471	2488.73	2209.33	2685	2193		2964.74	2613.27	3086.2	3235.2	1771.07	2268.33	4239.07	2218	1094	3597.13	3182.13	3037.87	2560	3379.2	4279	6269.73	4042	3775.93
3004	958	1942.4	1328	2932	3145	1617	1867	3326	2885		1784.13	1565	3203.47	5412.93	3717.27	3238	2588	3554	2178	1851	2298	471	3131	2472	2581	2353.73	2769.53	2199		3229.4	2876.93	3218	3247.4	1771.07	2418	4539.6	2378.2	1146	3597.13	3202.13	3180.67	2698.27	3386.87	4358	6532.67	4060.47	3788
3004	965	2053.8	1329	2935	3168	1639	1873	3354.8	2886		1902.47	1652.3	3606.93	5416.93	3843.8	3238	2590	3831.07	2199	1958	2316	473	3172	2472	2612	2552.8	2894	2208.4		3590.6	3209.93	3339.47	3275.67	1788.07	2524.2	4842.33	2430.2	1178	3601.13	3224.13	3327.47	2848.8	3439.2	4358	6781	4275.8	3897.4
3017	972	2240	1336.13	3078.93	3200	1639	1876	3414	2888		2007.4	1713	4046.93	5426.93	3890	3238	2592	3961.93	2218	1983	2330	493	3199	2526	2625	2715	2910	2370		3952.21	3339.4	3457.2	3416.4	1837.07	2661.6	5082	2472	1188	3601.13	3264.13	3573.33	2977.47	3451.2	4358	7178.27	4570.13	4098
3022	979	2441.53	1342	3323	3214	1639	1932	3570	2891		2072.13	1717	4293.6	5434.93	3903.07	3238	2600	4030	2232	2005	2336	495	3271	2528	2646	2811	2918	2525.07		4265.8	3481.6	3841.13	3445.4	1840.07	2790	5087	2472	1200	3715.47	3268.13	3699.07	3262.47	3492.2	4364	7333.73	4938.93	4403.53
3026	982	2590	1344	3668.2	3242	1650	1976	3702.47	2891		2089.13	1720	4353.07	5434.93	3998	3238	2600	4363.93	2234	2015	2364	501	3442	2530	2650	2834	3000	2846.6		4516.87	3829.73	4203.6	3459.4	1845.07	2842	5112.47	2473	1205	3869.13	3318.13	3966.07	3343.27	3523.07	4378	7480	5237.47	4710
3038	986	2630	1345	3937.2	3292	1654	2080	3774	2894		2102.13	1780	4361.53	5436.93	4134	3238	2600	4603.33	2252	2023	2385	545	3473	2588	2662	2856	3290.13	3148.4		4548.87	4212.47	4602.07	3477.4	1878.13	2863	5190	2479	1212	4098.73	3328.26	4211.67	3590.13	3594.13	4378	7486	5649.07	5029.87
3043	996	2630	1394	4189.67	3334.33	1668	2080	3774	2894		2113.13	1790.1	4361.53	5494.93	4134	3385.4	2604	4840.6	2253	2027	2532	661	3555	2655	2666	2863	3595	3505.93		4548.87	4471.8	4791.67	3477.4	1925.07	2970	5258	2479	1222	4295.07	3366.13	4442.33	3740	3827.27	4378	7514	6050.67	5337.13
3079	996	2630	1569.53	4256	3408	1708.93	2116.07	3774	2995.73		2213	1864	4361.53	5494.93	4140	3588.4	2604	4875	2262	2040	2706	727	3792	2743	2672	2871	3868.93	3771.93		4619.87	4640.47	4872.2	3501.33	1928.07	3071	5258	2479	1234.53	4560	3444.13	4450.33	3810	4065.74	4506.93	7593	6282	5630.6
3087	998	2642	1638.73	4260	3437	1723	2119	3774	3180		2460.93	1882	4367.53	5500.93	4188	3853.07	2604	4878	2264	2050	2937	759	4006	2864	2682	2884	3970.27	3908		4625.87	4664.47	4876.2	3613.4	2039.07	3071	5278	2479	1241	4771.8	3469.33	4466.33	3920.8	4261.74	4599.07	7598	6326	5824.07
3097.47	1127.47	2644	1880.87	4263	3438	1736	2124	3774	3411.87		2632.13	1885	4370.53	5541.27	4192	4062.27	2720.33	4890	2424.07	2061	3073	829	4084	2995	2690	2896.93	4030	3922		4637.87	4678.47	4889.2	3626.4	2199.4	3071	5280	2480	1244	4879.13	3573.13	4495.33	3938.8	4512.6	4681.73	7697.87	6326	6024.4
3149	1307.4	2645.8	2135.67	4337.67	3456	1754	2129	3774	3704.73		2744	1885	4370.53	5792.93	4192	4378	2916.47	4926	2638	2081	3200	829	4153	3195	2698	2906	4038	3926		4645.87	4708.47	4894.2	3626.4	2288.07	3074	5289	2480	1249	4882.13	3756.06	4562.33	3948.8	4797.2	4830.53	7856	6348	6128
3185	1480	2684	2234	4686.73	3583.47	1763	2130	3774	3950		2846.13	1886	4375.53	6059	4240	4764.07	3130.87	4970	2765.27	2085	3596	857	4321	3408	2702	2932.67	4095.87	3941		4661.87	4787.8	4898.2	3627.4	2526	3089	5313	2480	1250	4895.13	4008.67	4632.33	3948.8	5140.2	5037.13	7858	6350	6148
3236	1484	2696	2378	4819	3795.33	1773	2134	3774	3975		2856.13	1888	4417.53	6276.67	4266	5069.07	3433	4998	3000.93	2174	3723	946	4414	3546	2712.13	3099.33	4202	3946		4693.87	4842.47	4906.2	3689.47	2871.13	3096.07	5371	2480	1262	4927.8	4230.4	4632.33	3950.8	5466	5152	7868	6359	6172
3307.4	1485	2696	2403	4828	3950	1776	2136	3779.93	3996		2865.4	1890	4443.67	6398.93	4304	5464.67	3691.8	5004	3355.67	2245	3784	983	4446	3618	2843.8	3304	4221.53	3950		4745.87	4842.47	4928.2	3983.87	3275.47	3104	5378	2652	1272	4967.13	4380.59	4632.33	3950.8	5568.53	5152	7870	6374	6197
3334	1486	2700	2404	4907	4021.73	1790	2206.13	3784	4002		2866.13	1919	4825.67	6454.13	4330	5571.87	4031.47	5011	3653.93	2253	3786	997	4505	3618	3007.07	3383.87	4252	3955		4752.87	4882.87	4966.2	4001.4	3623.07	3106	5385	2745.6	1405	4977.13	4601.4	4682.33	4013.33	5697.2	5158	7872	6374	6252
3478	1486	2704	2418	4907	4100	1798	2303	3784	4002		2898.13	2001.5	5141.67	6682.93	4347.8	5628	4124	5033	3845.2	2295	3806	1015	4727	3619	3220	3444	4265	3956		4775.87	4916.47	4968.2	4007.4	3707.07	3111.53	5390	2815.87	1438.27	4995.07	4882.26	4722.93	4188.8	5707.2	5158	7872	6395	6270
3576	1498	2704	2427	4920	4102.33	1854	2447.8	3814.47	4004		2918.13	2374.4	5463.67	6804.13	4480.33	5635	4223	5047	3904	2317	3827	1107	5020	3693	3473.2	3444	4282	3974		4891.67	5005.47	5023.33	4021.4	3915.13	3142.07	5448	2846	1504	5033.13	5267.67	4836.33	4224.8	5794.6	5158	7873	6404	6292
3579	1755.47	2710	2438	4920	4126	1860	2655.87	3850	4006		3001.13	2780.8	5657.6	6816.93	4710.6	5638	4227	5054	3928	2333	3858	1114	5242	3693	3722.07	3444	4302	3982		4944.94	5040.47	5035.2	4050.4	3977.07	3150	5585.93	2996	1518	5043.13	5559.46	4838.33	4240.8	5854.2	5164	7873	6414	6314
3580	1902	2716	2442	4922	4176	1982.2	2906.67	3915	4006		3006.13	3051	5785.53	6835.53	4925.67	5644.07	4282	5180.47	3941	2409	3858	1117	5519	3694	4000.47	3489	4332	4029.27		4971.87	5120.4	5036.2	4050.4	4001.07	3177.67	5781.67	3140	1529	5072.47	5734.53	4868.33	4242.8	5963.74	5166	8014.67	6425	6354
3591	1902	2727	2444	4922	4199	2099	3106.47	4001.2	4008		3191.87	3148	5805.47	6940.6	5120	5687	4388	5359.2	3978	2567	3876	1118	5578	3694	4227.8	3496	4338	4044		5006.87	5339.6	5040.2	4053.4	4031.07	3206	6042.2	3158	1529	5113.13	5806.13	4868.33	4246.8	6055.2	5167	8202.27	6438	6529.93
3628	1902	2774	2462	4925	4202	2212	3224	4247	4008		3360.87	3148	5870.53	6948.93	5234.2	5692	4399	5572	4084	2618	3876	1119	5602	3694	4411.87	3612	4352	4056		5025.87	5516.13	5051.2	4053.4	4056.07	3240	6282.07	3174	1532	5144.13	5809.13	4894.33	4318.8	6105.2	5167	8499.6	6456	6776.13
3638	1908	2774	2466	4933	4310	2224	3224	4442.2	4010		3539.4	3148	5910.07	7025.73	5467	5697	4413	5854.87	4090	2630	3880	1161	5626	3695	4536	3642.07	4355	4069.87		5196.4	5520.47	5054.2	4053.4	4059.07	3326.13	6630.73	3188	1532	5203.13	5834.13	5106.73	4322.8	6125.2	5169	8784.73	6472	6978.53
3784.8	1910	2776	2513	4934	4408.13	2224	3224	4550	4010		3852.4	3148	5993.53	7045.93	5697.6	5714	4413	6099.73	4094	2667	3908	1239	5646	3695	4561	3696.07	4367	4110		5378.67	5560.47	5096.73	4053.4	4105.07	3502.73	7022.13	3199	1534	5318.4	5850.13	5224.33	4351.87	6199.13	5172	9154.27	6480	7197.73
4026	2013.07	2792	2526	4936	4536	2232	3224	4550	4013		3957.13	3152	6009.53	7048.93	5909.07	5724	4413	6242	4096	2675	3918	1330	5667	3706	4572	3734	4396	4159.13		5626.67	5608.47	5326.2	4160.4	4140.8	3748.33	7232.87	3210	1536	5515.27	5852.13	5439.4	4474.8	6332.2	5172	9553.87	6706.73	7424.93
4164.33	2196	2796	2540	4936	4550	2232	3224	4550	4014		3974.13	3152	6045.53	7062.93	6093.2	5728	4436	6261.93	4100	2687	3936	1418	5742	3706	4608	3761.07	4412	4192		5804.8	5689.27	5440.2	4169.13	4173.07	4061.27	7526.87	3210	1536	5758.33	5882.13	5638.07	4486.8	6412.8	5172	9762.67	6975.4	7554.87
4400.93	2200	2811.8	2620	4938	4558	2308.33	3224	4581	4122.73		4002.13	3152	6080.2	7072.93	6338	5736	4466	6268	4106	2735	3988	1671	5810	3716	4645.13	3929	4421	4202		6168.87	5692.47	5566.6	4241.4	4187.07	4299.4	7722	3214	1538	5954.27	5896.13	5787.13	4510.8	6476.2	5220.47	10024.8	7340	7574.2
4662	2202	2822	2783.33	5018	4571.6	2732.27	3224	4619	4265.93		4007.13	3152	6193.53	7074.93	6516.13	5743	4482	6272	4109	2743	3994	1783	5872	3716	4678	4059	4508.87	4218.07		6259.87	5700.47	5770.73	4275.4	4270.07	4658.73	7815.53	3214	1538	6207.27	5908.13	6036.87	4524.8	6512.8	5424.13	10343.9	7636.47	7602
4856.87	2421	2914	2939	5124.13	4682.8	2805	3256	4648.2	4464.8		4024.13	3156	6195.53	7114.93	6677.07	5754	4490	6322	4114	2747	4020	1860	5951	3716	4800.6	4059	4658.13	4281.67		6306	5716.47	6030.47	4299.4	4277.07	4824	7952.53	3224	1547.67	6579.07	5919.13	6346.73	4534.8	6533.2	5586.67	10522.6	7707	7606
4939	2433	3110.47	3027	5144	4709	2847.4	3257	4726	4490		4032.13	3158	6238.53	7130.93	6696	5816.13	4528	6342	4199.87	2761	4092	1877	6068	3716	4844	4060	4789.8	4403.47		6319.87	5786.73	6226.2	4384.87	4303.07	4928.27	8048	3226	1564	6758.67	5930.13	6762	4548.8	6562.53	5774	10618	7726	7644
