# Supplementary material for: Cold-induced hyperphagia requires AgRP neuron activation in mice
Source: eLife journal article supplement (doi:10.7554/elife.58764), 2020-12-15
Supplement: supp [file elife-58764-supp-v1.zip › elife_poa_e58764_Figure_5_source_data_1.xlsx]

## Sheet: Fig 5D F H (FI)
CNO-30C						Saline-30C								CNO-22C									Saline-22C											CNO-14C								Saline-14C
0	0	0	0	0	0	0	0	0	0	0	0			0	0	0	0	0	0	0	0	0.031	0	0	0	0	0	0	0	0	0			0	0	0	0	0	0	0	0	0	0	0	0	0	0.031	0	0
0	0.00537504	0	0	0	0.00330255	0	0	0	0.137177	0	0.0425596			0.0105629	0.008339	0	0	0	0	0	0	0.062	0	0	0.147136	0	0	0.0001798	0	0.031	0			0.031	0	0	0.062	0.186	0	0	0	0.124	0	0.062	0.186	0.155	0.062	0	0
0.0199921	0.00892682	0.0313614	0.0100281	0	0.00567626	0	0	0	0.243958	0	0.103545			0.0211254	0.008339	0.335947	0	0.0458087	0	0	0	0.093	0	0	0.294274	0	0	0.0388926	0	0.031	0.031			0.062	0	0	0.186	0.279	0.031	0	0	0.248	0	0.124	0.403	0.279	0.093	0	0
0.0745095	0.01017	0.0807518	0.0100281	0	0.00567626	0	0	0	0.396501	0	0.103545			0.0316879	0.008339	0.548545	0	0.102126	0	0	0	0.124	0	0	0.441405	0.100772	0.000707392	0.0779185	0	0.031	0.031			0.093	0	0.031	0.248	0.372	0.031	0	0	0.403	0	0.186	0.589	0.341	0.093	0	0
0.0749267	0.01017	0.201839	0.0100281	0	0.00567626	0	0	0	0.549051	0.0105705	0.103545			0.0422507	0.008339	0.548545	0	0.158447	0	0	0.031	0.155	0	0	0.574804	0.100772	0.00339369	0.102945	0	0.031	0.031			0.155	0	0.062	0.341	0.372	0.062	0	0	0.527	0	0.248	0.775	0.465	0.155	0	0
0.0749267	0.01017	0.246915	0.0100281	0	0.00567626	0	0	0	0.7016	0.0493705	0.103545			0.052814	0.008339	0.548545	0.00626882	0.214765	0	0	0.062	0.155	0	0	0.598053	0.158872	0.00608	0.175228	0	0.031	0.031			0.155	0	0.062	0.434	0.372	0.062	0	0.093	0.651	0	0.31	0.992	0.558	0.248	0	0
0.0749267	0.01017	0.355717	0.0100281	0	0.00567626	0	0	0	0.85415	0.0539718	0.483383			0.0613703	0.008339	0.548545	0.00785216	0.271086	0	0	0.062	0.155	0	0	0.617139	0.158872	0.00870362	0.191719	0	0.031	0.031			0.155	0	0.062	0.496	0.372	0.062	0	0.186	0.775	0	0.372	0.992	0.682	0.31	0	0
0.0749267	0.01017	0.355717	0.0100281	0	0.00567626	0	0	0	0.892796	0.0539718	0.483383			0.128634	0.008339	0.548545	0.155831	0.327403	0	0.062	0.062	0.155	0	0	0.617139	0.158872	0.00870362	0.203571	0	0.031	0.062			0.155	0	0.217	0.558	0.372	0.093	0	0.186	0.837	0	0.434	0.992	0.713	0.372	0.093	0
0.0749267	0.01017	0.355717	0.0100281	0	0.00567626	0	0	0	0.892796	0.0539718	0.483383			0.128634	0.008339	0.548545	0.24039	0.383724	0	0.062	0.062	0.155	0	0	0.617139	0.158872	0.136015	0.203571	0	0.031	0.062			0.155	0	0.403	0.558	0.372	0.093	0	0.186	0.837	0	0.465	0.992	0.713	0.434	0.093	0
0.0749267	0.01017	0.355717	0.0100281	0	0.00567626	0	0	0	0.892796	0.0539718	0.483383			0.128634	0.008339	0.548545	0.241853	0.430469	0	0.062	0.093	0.155	0	0	0.617139	0.158872	0.179181	0.203571	0	0.031	0.062			0.155	0	0.589	0.558	0.372	0.093	0	0.217	0.837	0	0.527	0.992	0.713	0.496	0.093	0
0.0749267	0.01017	0.355717	0.0100281	0	0.00567626	0	0	0	0.892796	0.0539718	0.483383			0.128634	0.008339	0.548545	0.29671	0.430469	0	0.062	0.093	0.155	0	0	0.617139	0.158872	0.179181	0.203571	0	0.031	0.062			0.155	0	0.589	0.558	0.372	0.093	0	0.217	0.837	0	0.589	0.992	0.713	0.589	0.093	0
0.0749267	0.01017	0.355717	0.0100281	0	0.00567626	0	0	0	0.892796	0.0539718	0.483383			0.128634	0.065937	0.548545	0.351567	0.430469	0	0.062	0.093	0.155	0	0	0.617139	0.158872	0.179181	0.203571	0.031	0.031	0.062			0.155	0	0.589	0.558	0.372	0.093	0	0.217	0.837	0	0.589	0.992	0.713	0.651	0.093	0
0.0749267	0.01017	0.355717	0.0100281	0	0.00567626	0	0	0	0.892796	0.0539718	0.483383			0.128634	0.112592	0.548545	0.398563	0.430469	0	0.062	0.093	0.155	0	0	0.617139	0.158872	0.179181	0.203571	0.031	0.031	0.062			0.155	0	0.589	0.558	0.372	0.093	0	0.217	0.837	0	0.589	0.992	0.713	0.682	0.093	0
0.0749267	0.01017	0.355717	0.0100281	0	0.00567626	0	0	0	0.892796	0.0539718	0.483383			0.128634	0.112592	0.548545	0.398563	0.430469	0	0.062	0.093	0.155	0	0	0.617139	0.158872	0.179181	0.203571	0.031	0.031	0.062			0.155	0	0.589	0.558	0.372	0.093	0	0.217	0.837	0	0.589	0.992	0.713	0.713	0.093	0
0.0749267	0.01017	0.355717	0.0100281	0	0.00567626	0	0	0	0.892796	0.0539718	0.483383			0.128634	0.112592	0.548545	0.398563	0.430469	0	0.062	0.093	0.155	0	0	0.617139	0.158872	0.179181	0.203571	0.031	0.031	0.062			0.155	0	0.589	0.558	0.372	0.093	0	0.217	0.837	0	0.589	0.992	0.713	0.837	0.093	0
0.0749267	0.01017	0.355717	0.0100281	0	0.00567626	0	0	0	0.892796	0.0539718	0.483383			0.200237	0.112592	0.548545	0.398563	0.430469	0	0.062	0.093	0.155	0	0	0.617139	0.158872	0.179181	0.203571	0.031	0.031	0.062			0.155	0	0.589	0.558	0.372	0.093	0	0.217	0.837	0	0.589	0.992	0.713	0.93	0.093	0
0.179242	0.01017	0.355717	0.0100281	0	0.00567626	0	0	0	0.892796	0.0539718	0.483383			0.360541	0.112592	0.548545	0.398563	0.430469	0	0.062	0.093	0.155	0	0	0.617139	0.203149	0.179181	0.203571	0.031	0.031	0.062			0.155	0	0.589	0.558	0.372	0.093	0	0.217	0.837	0	0.589	0.992	0.713	0.93	0.093	0
0.411054	0.01017	0.355717	0.0100281	0	0.00567626	0	0	0	0.892796	0.0539718	0.483383			0.52085	0.112592	0.548545	0.398563	0.430469	0	0.062	0.093	0.155	0	0	0.617139	0.518748	0.179181	0.203571	0.031	0.031	0.062			0.155	0	0.589	0.558	0.372	0.31	0	0.217	0.837	0	0.589	0.992	0.713	0.93	0.093	0.124
0.431917	0.01017	0.355717	0.0100281	0	0.00567626	0	0	0	0.892796	0.0539718	0.483383			0.665664	0.112592	0.548545	0.398563	0.430469	0	0.062	0.093	0.155	0.041509	0	0.617139	0.518748	0.179181	0.203571	0.031	0.217	0.062			0.155	0	0.589	0.558	0.372	0.62	0	0.217	0.837	0	0.589	0.992	0.713	0.93	0.093	0.341
0.465028	0.01017	0.355717	0.0100281	0	0.00567626	0	0	0	0.925189	0.0539718	0.483383			0.665664	0.112592	0.548545	0.398563	0.430469	0	0.062	0.093	0.155	0.249054	0	0.617139	0.518748	0.179181	0.203571	0.155	0.434	0.062			0.186	0	0.682	0.558	0.372	0.62	0	0.248	0.837	0	0.589	0.992	0.713	0.93	0.093	0.372
0.465028	0.01017	0.355717	0.0100281	0	0.00567626	0	0	0	0.984086	0.0539718	0.483383			0.708091	0.112592	0.548545	0.398563	0.430469	0	0.062	0.093	0.155	0.372186	0	0.617139	0.518748	0.179181	0.203571	0.186	0.496	0.062			0.248	0	0.806	0.558	0.372	0.62	0	0.279	0.837	0	0.651	0.992	0.713	1.209	0.093	1.209
0.465028	0.01017	0.355717	0.0100281	0	0.00567626	0	0	0	1.04298	0.0539718	0.483383			0.723179	0.112592	0.548545	0.398563	0.483386	0	0.062	0.093	0.155	0.372186	0	0.617139	0.518748	0.179181	0.203571	0.403	0.496	0.062			0.279	0.124	0.93	0.558	0.372	0.62	0	0.372	0.837	0	0.744	0.992	0.713	1.364	0.093	1.209
0.465028	0.01017	0.355717	0.0100281	0	0.00567626	0	0	0	1.10188	0.0539718	0.483383			0.723179	0.112592	0.548545	0.398563	0.57208	0	0.062	0.093	0.155	0.372186	0.00672365	0.617139	0.518748	0.179181	0.203571	0.682	0.496	0.062			0.31	0.248	1.085	0.558	0.372	0.62	0	0.372	0.837	0	0.837	0.992	0.713	1.364	0.093	1.209
0.465028	0.01017	0.355717	0.0100281	0	0.00567626	0	0	0	1.1113	0.0539718	0.483383			0.723179	0.112592	0.548545	0.398563	0.660771	0	0.062	0.093	0.155	0.372186	0.0483006	0.617139	0.518748	0.179181	0.203571	0.93	0.496	0.062			0.341	0.341	1.178	0.558	0.372	0.62	0	0.372	0.899	0	0.93	1.116	0.713	1.364	0.217	1.209
0.465028	0.01017	0.355717	0.0100281	0	0.00567626	0	0	0	1.1113	0.0539718	0.483383			0.723179	0.112592	0.548545	0.398563	0.749462	0	0.062	0.093	0.155	0.372186	0.0890544	0.617139	0.518748	0.179181	0.203571	1.085	0.496	0.062			0.341	0.403	1.178	0.558	0.372	0.62	0	0.372	1.054	0	1.023	1.395	0.713	1.364	0.465	1.209
0.465028	0.01017	0.355717	0.0100281	0	0.00567626	0	0	0	1.1113	0.0539718	0.483383			0.723179	0.112592	0.548545	0.398563	0.801496	0	0.062	0.093	0.155	0.372186	0.13022	0.617139	0.518748	0.179181	0.203571	1.209	0.496	0.062			0.341	0.403	1.178	0.558	0.372	0.62	0	0.372	1.147	0	1.054	1.643	0.713	1.364	0.62	1.209
0.465028	0.01017	0.355717	0.0100281	0	0.00567626	0	0	0	1.1113	0.0539718	0.483383			0.723179	0.112592	0.548545	0.398563	0.801496	0	0.062	0.093	0.155	0.372186	0.159173	0.623146	0.518748	0.179181	0.203571	1.426	0.496	0.062			0.341	0.403	1.178	0.558	0.372	0.62	0	0.372	1.271	0	1.054	1.643	0.806	1.364	0.62	1.209
0.465028	0.01017	0.355717	0.0100281	0	0.00567626	0	0	0	1.1113	0.0539718	0.557342			0.723179	0.112592	0.548545	0.398563	0.801496	0	0.062	0.093	0.155	0.372186	0.159173	0.648672	0.518748	0.269905	0.203571	1.643	0.496	0.062			0.341	0.403	1.178	0.558	0.372	0.62	0	0.372	1.364	0	1.054	1.643	1.116	1.364	0.62	1.209
0.465028	0.01017	0.355717	0.0100281	0	0.00567626	0	0	0	1.1113	0.0539718	0.566715			0.786757	0.112592	0.548545	0.398563	0.80852	0	0.062	0.093	0.155	0.372186	0.159173	0.79047	0.536802	0.413909	0.212874	1.86	0.496	0.062			0.341	0.403	1.178	0.558	0.403	0.62	0	0.372	1.364	0	1.054	1.643	1.426	1.364	0.62	1.209
0.465028	0.01017	0.355717	0.0100281	0	0.012612	0	0	0	1.1113	0.0539718	0.661493			0.955549	0.112592	0.548545	0.398563	0.80852	0	0.062	0.093	0.155	0.372186	0.159173	0.932266	0.536802	0.557909	0.339701	1.891	0.496	0.062			0.341	0.403	1.178	0.558	0.403	0.62	0	0.372	1.364	0	1.054	1.643	1.736	1.364	0.62	1.209
0.465028	0.01017	0.355717	0.0100281	0	0.0179749	0	0	0	1.1113	0.0539718	0.708626			1.08214	0.112592	0.548545	0.547294	0.80852	0	0.062	0.093	0.155	0.372186	0.159173	1.0164	0.536802	0.652948	0.466531	1.891	0.496	0.062			0.341	0.403	1.178	0.558	0.527	0.62	0	0.372	1.364	0	1.054	1.643	2.015	1.364	0.62	1.209
0.465028	0.01017	0.355717	0.0100281	0	0.0179749	0	0	0	1.1113	0.0539718	0.708626			1.08214	0.112592	0.548545	0.782133	0.80852	0	0.062	0.093	0.155	0.372186	0.159173	1.0164	0.771423	0.652948	0.593359	1.891	0.496	0.062			0.341	0.403	1.178	0.558	0.62	0.62	0	0.372	1.364	0.062	1.054	1.643	2.015	1.364	0.62	1.209
0.590444	0.01017	0.355717	0.0100281	0	0.0179749	0	0	0	1.1113	0.0539718	0.708626			1.08214	0.112592	0.548545	0.995054	0.80852	0	0.248	0.093	0.155	0.372186	0.159173	1.0164	0.771423	0.652948	0.718921	1.891	0.496	0.062			0.341	0.403	1.178	0.558	0.713	0.62	0	0.372	1.364	0.279	1.054	1.643	2.015	1.364	0.62	1.209
0.80707	0.01017	0.355717	0.0100281	0	0.0179749	0	0	0	1.1113	0.0539718	0.708626			1.08214	0.112592	0.548545	0.995054	0.80852	0	0.341	0.093	0.155	0.372186	0.159173	1.0164	0.771423	0.652948	0.718921	1.891	0.651	0.062			0.341	0.403	1.178	0.558	0.837	0.62	0	0.651	1.364	0.496	1.054	1.643	2.015	1.364	0.62	1.209
0.80707	0.01017	0.378092	0.0100281	0	0.0179749	0	0	0	1.1113	0.0539718	0.708626			1.08214	0.112592	0.548545	0.995054	0.80852	0	0.341	0.155	0.155	0.372186	0.159173	1.0164	0.771423	0.652948	0.718921	1.891	0.899	0.062			0.341	0.403	1.178	0.558	0.837	0.62	0	0.837	1.364	0.713	1.054	1.643	2.015	1.364	0.62	1.209
0.80707	0.01017	0.49382	0.0100281	0	0.0179749	0	0	0	1.1113	0.0539718	0.708626			1.08214	0.114204	0.548545	0.995054	0.80852	0	0.434	0.279	0.155	0.372186	0.159173	1.0164	0.80272	0.652948	0.718921	1.891	0.899	0.062			0.341	0.403	1.178	0.558	0.837	0.62	0	0.837	1.364	0.868	1.054	1.643	2.015	1.364	0.62	1.209
0.80707	0.01017	0.609549	0.0100281	0	0.0179749	0	0	0	1.1113	0.0539718	0.708626			1.08214	0.163866	0.548545	0.995054	0.80852	0	0.465	0.372	0.155	0.372186	0.159173	1.0164	0.824073	0.652948	0.718921	1.891	0.899	0.062			0.341	0.403	1.178	0.558	0.837	0.62	0	0.837	1.364	0.868	1.054	1.643	2.015	1.364	0.62	1.209
0.80707	0.0918017	0.725278	0.0100281	0	0.0179749	0	0	0	1.1113	0.0539718	0.708626			1.08214	0.163866	0.548545	0.995054	0.958793	0	0.527	0.403	0.155	0.372186	0.159173	1.0164	0.89776	0.652948	0.718921	1.891	0.899	0.062			0.341	0.403	1.178	0.558	0.837	0.62	0	0.837	1.364	0.868	1.054	1.643	2.015	1.426	0.62	1.209
0.80707	0.163383	0.778127	0.0100281	0	0.0179749	0	0	0	1.1113	0.0539718	0.708626			1.08214	0.163866	0.717154	0.995054	1.03001	0	0.527	0.403	0.155	0.639096	0.159173	1.0164	1.2543	0.652948	0.718921	1.891	0.899	0.062			0.341	0.403	1.178	0.558	0.837	0.62	0	0.837	1.364	0.868	1.054	1.643	2.015	1.581	0.62	1.426
0.80707	0.163383	0.778127	0.0100281	0	0.0179749	0	0	0	1.1113	0.0539718	0.708626			1.08214	0.163866	0.717154	0.995054	1.03001	0	0.527	0.403	0.155	1.00614	0.159173	1.0164	1.37196	0.652948	0.718921	1.891	0.899	0.062			0.341	0.403	1.178	0.558	0.837	0.651	0	0.837	1.364	0.868	1.054	1.643	2.015	1.705	0.62	1.519
0.80707	0.163383	0.778127	0.0100281	0	0.0179749	0	0	0	1.1113	0.0539718	0.708626			1.08214	0.163866	0.717154	0.995054	1.03001	0.0140304	0.527	0.403	0.155	1.00614	0.159173	1.0164	1.37196	0.652948	0.718921	1.891	0.899	0.062			0.341	0.403	1.178	0.558	0.837	0.806	0	0.837	1.364	0.868	1.054	1.643	2.015	1.891	0.62	1.55
0.972498	0.163383	0.778127	0.0100281	0	0.0179749	0	0	0	1.1113	0.0539718	0.708626			1.092	0.163866	0.717154	0.995054	1.03001	0.0891932	0.527	0.403	0.155	1.00614	0.159173	1.0164	1.37196	0.652948	0.718921	1.891	0.899	0.062			0.341	0.403	1.178	0.558	0.837	0.961	0	0.837	1.364	0.868	1.333	1.643	2.015	2.046	0.62	1.581
1.2886	0.163383	0.778127	0.0100281	0	0.0179749	0	0.389793	0	1.1113	0.0539718	0.708626			1.14891	0.163866	0.717154	0.995054	1.03001	0.164356	0.527	0.403	0.155	1.00614	0.159173	1.0164	1.37196	0.652948	0.718921	1.891	0.899	0.062			0.341	0.403	1.178	0.558	0.837	1.054	0	0.837	1.364	0.868	1.891	1.643	2.015	2.046	0.62	1.612
1.47089	0.163383	0.778127	0.0100281	0	0.0179749	0	1.36359	0.00491944	1.1113	0.0539718	0.708626			1.20581	0.163866	0.717154	0.995054	1.03001	0.239521	0.527	0.403	0.155	1.00614	0.159173	1.0164	1.37196	0.652948	0.718921	1.891	0.899	0.062			0.434	0.403	1.24	0.558	0.837	1.085	0	0.837	1.364	0.868	2.449	1.643	2.015	2.046	0.62	1.643
1.47089	0.163383	0.778127	0.0100281	0	0.0179749	0	1.36359	0.00491944	1.1113	0.0539718	0.708626			1.25057	0.163866	0.717154	0.995054	1.03001	0.314687	0.527	0.403	0.155	1.00614	0.159173	1.0164	1.37196	0.652948	0.718921	1.891	0.899	0.062			0.558	0.403	1.395	0.558	0.837	1.085	0	0.837	1.457	0.868	3.007	1.643	2.015	2.046	0.62	1.674
1.47089	0.163383	0.778127	0.0100281	0	0.0179749	0	1.36359	0.00491944	1.1113	0.0539718	0.708626			1.25057	0.163866	0.717154	0.995054	1.03001	0.373317	0.527	0.403	0.155	1.00614	0.159173	1.0164	1.83212	0.652948	0.718921	2.046	0.899	0.062			0.651	0.403	1.581	0.558	0.837	1.209	0	0.837	1.519	0.868	3.472	1.643	2.015	2.046	0.837	1.736
1.47089	0.163383	0.778127	0.0100281	0	0.0179749	0	1.36359	0.00491944	1.16858	0.0698615	0.708626			1.25057	0.163866	0.717154	0.995054	1.03001	0.400657	0.527	0.403	0.155	1.00614	1.31515	2.04414	1.83212	0.652948	0.718921	2.263	0.899	0.062			0.651	0.403	1.736	0.558	0.868	1.302	0	0.837	1.612	0.868	3.472	1.643	2.015	2.046	1.178	1.736
1.47089	0.163383	0.778127	0.0100281	0	0.0179749	0	1.36359	0.00491944	1.2545	0.080887	0.708626			1.25057	0.163866	0.717154	1.00783	1.03001	0.400657	0.527	0.403	0.155	1.00614	1.31515	2.08455	1.83687	0.652948	0.718921	2.325	0.899	0.062			0.651	0.403	1.829	0.558	0.868	1.302	0	0.837	1.643	0.868	3.472	1.643	2.015	2.046	1.24	1.736
1.47089	0.163383	0.778127	0.0100281	0	0.0179749	0	1.36359	0.00491944	1.34042	0.0894014	0.708626			1.25057	0.163866	0.717154	1.00783	1.03001	0.400657	0.527	0.403	0.155	1.00614	1.31515	2.08913	2.1606	0.652948	0.718921	2.325	0.899	0.062			0.651	0.403	1.829	0.558	0.868	1.302	0	0.868	1.643	0.868	3.472	1.643	2.015	2.046	1.24	1.736

## Sheet: Fig 5E G I (Heat)
CNO-30C					Saline-30C							CNO-22C									Saline-22C											CNO-14C								Saline-14C
0.532975	0.431648	0.412992	0.287414	0.429401	0.433388	0.376321	0.391997	0.428388	0.478405			0.751546	0.835094	0.641576	0.499372	0.417132	0.613196	0.724	0.529		0.751546	0.835094	0.641576	0.499372	0.417132	0.613196	0.724	0.529	0.466			0.452738	0.585141	0.487334	0.384655	0.592021	0.808	0.558	0.731	0.599429	0.774652	0.628444	0.707756	0.504644	0.81	0.589	0.5	0.743
0.424835	0.314744	0.418905	0.281241	0.525998	0.395951	0.288565	0.416101	0.385173	0.519078			0.798661	0.579591	0.612806	0.503343	0.55383	0.506796	0.883	0.637	0.632	0.680046	0.716377	0.513867	0.535863	0.441786	0.563651	0.796	0.563	0.729			0.949447	0.743641	0.687512	0.62318	0.816148	0.961	0.693	0.786	0.786774	0.860349	0.694883	0.701509	0.861092	0.929	0.748	0.773	0.887
0.345507	0.276955	0.406907	0.270033	0.533912	0.319489	0.346555	0.381469	0.390475	0.408231			0.570945	0.470553	0.538478	0.537355	0.606216	0.509967	0.723	0.551	0.781	0.488558	0.718912	0.432025	0.436563	0.530294	0.518667	0.775	0.505	0.59			0.968717	0.633016	0.655145	0.544565	0.770548	0.88	0.694	0.771	0.770554	0.831715	0.657141	0.713726	0.859364	1.021	0.65	0.95	1.018
0.414308	0.383735	0.413322	0.299385	0.436069	0.358019	0.287612	0.442004	0.355667	0.407567			0.512147	0.60472	0.473276	0.462179	0.461601	0.466952	0.67	0.442	0.745	0.663911	0.671638	0.365067	0.342567	0.453623	0.565497	0.751	0.476	0.582			0.698668	0.673446	0.856174	0.513602	0.639983	0.825	0.62	0.85	0.790874	0.70397	0.783476	0.711335	0.746862	0.901	0.615	0.813	0.9
0.265713	0.240553	0.358724	0.209897	0.421554	0.288624	0.27409	0.385088	0.282424	0.456149			0.521201	0.404219	0.412645	0.457435	0.51726	0.412115	0.576	0.523	0.809	0.432302	0.587851	0.426606	0.334767	0.43366	0.52986	0.743	0.478	0.511			0.649114	0.613183	0.660862	0.458829	0.624614	0.904	0.541	0.783	0.803801	0.699447	0.741352	0.718494	0.745386	0.898	0.544	0.703	0.924
0.314661	0.231991	0.488044	0.204398	0.366767	0.209879	0.252902	0.342833	0.342554	0.387736			0.405797	0.454593	0.377049	0.565095	0.525029	0.410009	0.598	0.477	0.794	0.425518	0.609084	0.380018	0.3446	0.476423	0.477992	0.756	0.433	0.533			0.650738	0.527905	0.738936	0.450804	0.546243	0.788	0.506	0.684	0.708854	0.719845	0.664648	0.749525	0.666107	0.832	0.632	0.68	0.921
0.225123	0.149602	0.455565	0.194086	0.326122	-0.0334485	0.201203	0.261443	0.274902	0.324891			0.427295	0.39958	0.372575	0.428293	0.462575	0.428059	0.526	0.528	0.717	0.421187	0.624836	0.429439	0.407724	0.534838	0.41504	0.769	0.418	0.546			0.620342	0.504658	0.755731	0.473627	0.548168	0.858	0.531	0.752	0.645445	0.615612	0.669099	0.656136	0.587289	0.982	0.446	0.705	0.838
0.187595	0.17936	0.309014	0.191197	0.164126	0.184601	0.171383	0.227512	0.276174	0.299937			0.378858	0.395424	0.417769	0.477715	0.465305	0.449475	0.674	0.463	0.558	0.459563	0.633126	0.351485	0.388721	0.440831	0.535447	0.596	0.356	0.442			0.540129	0.669059	0.528062	0.471859	0.510063	0.87	0.516	0.692	0.694547	0.664994	0.721457	0.567426	0.618409	0.815	0.457	0.739	0.946
0.157072	0.173544	0.259967	0.164243	0.175514	0.225601	0.150271	0.236582	0.269543	0.261824			0.431617	0.416784	0.382377	0.40188	0.455633	0.403237	0.564	0.551	0.695	0.596139	0.576155	0.385026	0.387656	0.398052	0.317806	0.656	0.351	0.537			0.614178	0.598332	0.531507	0.437989	0.555011	0.933	0.547	0.736	0.788033	0.618531	0.633516	0.485927	0.577797	0.84	0.462	0.662	0.83
0.149107	0.195703	0.34709	0.171728	0.172074	0.194179	0.151303	0.222347	0.26346	0.234277			0.424117	0.441225	0.403746	0.408786	0.488492	0.401927	0.548	0.449	0.61	0.497628	0.723821	0.40222	0.392128	0.349964	0.261088	0.576	0.327	0.423			0.609527	0.64202	0.554389	0.467747	0.563296	0.797	0.516	0.71	0.696426	0.760256	0.604656	0.49096	0.534134	0.826	0.441	0.636	0.794
0.178859	0.186096	0.250899	0.162651	0.305021	0.182233	0.134185	0.234693	0.174962	0.193117			0.345316	0.511326	0.416229	0.354735	0.462564	0.357923	0.466	0.463	0.537	0.443078	0.615625	0.369976	0.398543	0.340625	0.253698	0.569	0.343	0.676			0.58499	0.542308	0.75383	0.512937	0.571559	0.754	0.458	0.652	0.600187	0.578336	0.626907	0.477013	0.530491	0.865	0.453	0.678	0.862
0.172828	0.176049	0.190105	0.156599	0.184972	0.1447	0.137655	0.209278	0.167585	0.212858			0.372241	0.731307	0.399931	0.35648	0.468327	0.39681	0.624	0.45	0.567	0.445326	0.546786	0.399246	0.399227	0.358518	0.337328	0.574	0.36	0.449			0.600811	0.612664	0.403385	0.499509	0.59029	0.786	0.428	0.657	0.67546	0.536166	0.574623	0.542499	0.501358	0.879	0.439	0.628	0.782
0.158278	0.165411	0.229479	0.196298	0.16358	0.149555	0.235959	0.243175	0.202225	0.197494			0.379943	0.69656	0.422108	0.297672	0.418584	0.310648	0.675	0.387	0.568	0.544537	0.598723	0.289219	0.351102	0.334247	0.344342	0.681	0.328	0.541			0.593652	0.620166	0.488396	0.495519	0.574775	0.774	0.47	0.627	0.625438	0.693534	0.501952	0.52092	0.470077	0.873	0.459	0.549	0.787
0.304393	0.169151	0.235145	0.168071	0.175092	0.157885	0.192755	0.224748	0.255266	0.351693			0.38652	0.582118	0.522807	0.336761	0.478695	0.260274	0.622	0.447	0.625	0.440121	0.476727	0.222801	0.420111	0.499906	0.361424	0.621	0.334	0.482			0.537417	0.523366	0.702694	0.50171	0.574908	0.789	0.46	0.623	0.540017	0.586989	0.685253	0.564668	0.540515	0.809	0.649	0.557	0.771
0.203788	0.163536	0.22808	0.161069	0.173633	0.202454	0.168911	0.222608	0.295762	0.204899			0.380935	0.52649	0.391744	0.324604	0.420117	0.272561	0.576	0.378	0.562	0.46057	0.497613	0.220795	0.419198	0.463609	0.332778	0.651	0.35	0.423			0.616552	0.480131	0.545628	0.463003	0.653929	0.777	0.492	0.738	0.520301	0.682692	0.522095	0.542417	0.468297	0.793	0.589	0.715	0.757
0.219526	0.226563	0.228019	0.165728	0.204866	0.239281	0.176702	0.217208	0.216761	0.20034			0.4239	0.486451	0.451241	0.354024	0.436344	0.311163	0.712	0.423	0.529	0.493068	0.468778	0.274759	0.412101	0.488876	0.350051	0.575	0.304	0.436			0.580915	0.699056	0.591549	0.480725	0.544363	0.758	0.557	0.833	0.512134	0.541881	0.504506	0.48493	0.513691	0.754	0.545	0.563	0.692
0.211367	0.181468	0.229146	0.210962	0.173102	0.315969	0.161408	0.192531	0.278144	0.176688			0.396445	0.340975	0.359275	0.333131	0.381775	0.238991	0.62	0.356	0.54	0.468317	0.392308	0.264258	0.371992	0.47603	0.272717	0.586	0.467	0.434			0.671027	0.573563	0.555383	0.451541	0.55563	0.692	0.502	0.901	0.494729	0.559013	0.53118	0.48018	0.557472	0.72	0.668	0.526	0.763
0.148333	0.19426	0.32871	0.188914	0.170055	0.237484	0.186508	0.276156	0.246872	0.191181			0.455854	0.390471	0.415531	0.332587	0.332975	0.32419	0.622	0.414	0.526	0.592838	0.400461	0.283265	0.376567	0.405411	0.339639	0.643	0.611	0.454			0.707939	0.599143	0.544473	0.459753	0.57752	0.75	0.552	0.878	0.492142	0.407197	0.487967	0.499337	0.533984	0.706	0.668	0.547	0.64
0.22827	0.186857	0.269394	0.180576	0.180868	0.191316	0.154217	0.200529	0.245913	0.199351			0.552714	0.405391	0.370724	0.326695	0.388656	0.413167	0.651	0.421	0.513	0.632682	0.406061	0.273751	0.344681	0.437371	0.342362	0.708	0.471	0.447			0.909988	0.613432	0.792167	0.472147	0.524987	0.78	0.51	0.764	0.495482	0.671237	0.537808	0.495948	0.533855	0.762	0.468	0.545	0.626
0.187434	0.196413	0.346738	0.170212	0.157214	0.15586	0.175695	0.228703	0.184729	0.181837			0.551751	-0.00265	0.465139	0.332467	0.380092	0.333807	0.585	0.327	0.506	0.686742	0.407295	0.301063	0.422891	0.348719	0.309426	0.542	0.491	0.427			0.785129	0.457897	0.537689	0.478391	0.52163	0.846	0.572	0.731	0.44974	0.540268	0.607043	0.518078	0.564589	0.69	0.396	0.503	0.629
0.186637	0.197468	0.361268	0.180744	0.288762	0.172386	0.181773	0.209142	0.179988	0.169957			0.473181	0.427191	0.372927	0.36261	0.342074	0.322218	0.472	0.417	0.524	0.753507	0.430789	0.253016	0.361633	0.364668	0.362094	0.69	0.418	0.465			0.834555	0.420646	0.544649	0.482212	0.519311	0.874	0.681	0.697	0.465433	0.549137	0.685848	0.543948	0.514206	0.684	0.431	0.786	0.676
0.178864	0.16981	0.485169	0.177223	0.383394	0.155426	0.179135	0.171492	0.183802	0.20715			0.48146	0.359431	0.35593	0.371534	0.30883	0.294685	0.448	0.364	0.509	0.480388	0.431262	0.273473	0.383691	0.43954	0.529862	0.607	0.429	0.432			0.845887	0.431886	0.441166	0.422691	0.551935	0.869	0.52	0.621	0.513458	0.533134	0.663262	0.529884	0.53674	0.677	0.423	0.783	0.917
0.157819	0.193125	0.481984	0.2073	0.313891	0.159453	0.211014	0.200355	0.230781	0.200895			0.340353	0.367109	0.34445	0.466615	0.436705	0.348083	0.495	0.313	0.53	0.311138	0.417606	0.278385	0.35786	0.408018	0.305765	0.483	0.584	0.467			0.604421	0.506129	0.466365	0.437648	0.532634	0.776	0.433	0.631	0.520824	0.462265	0.723846	0.861619	0.485289	0.759	0.378	0.73	0.945
0.163715	0.191158	0.334479	0.18435	0.304224	0.167329	0.194205	0.208067	0.229114	0.201472			0.601752	0.352293	0.295207	0.480664	0.380159	0.24252	0.543	0.377	0.425	0.479969	0.427789	0.262729	0.375254	0.448937	0.2751	0.594	0.445	0.571			0.719882	0.462647	0.548003	0.4668	0.522851	0.782	0.457	0.642	0.6507	0.520607	0.64724	0.601085	0.557564	0.714	0.528	0.67	0.918
0.193707	0.199681	0.278927	0.133912	0.269904	0.174546	0.208522	0.194636	0.166061	0.184653			0.34522	0.378669	0.318644	0.540289	0.383719	0.366947	0.548	0.364	0.598	0.547366	0.445739	0.283381	0.369423	0.390373	0.475857	0.545	0.407	0.737			0.679343	0.566807	0.505953	0.477552	0.487372	0.825	0.42	0.633	0.638915	0.546198	0.688051	0.689092	0.556169	0.655	0.366	0.719	0.799
0.171023	0.197509	0.246083	0.226238	0.236356	0.185612	0.158132	0.21692	0.170314	0.182321			0.378002	0.425021	0.359114	0.63851	0.341141	0.399002	0.558	0.361	0.642	0.515627	0.43961	0.26863	0.379345	0.389056	0.46053	0.552	0.332	0.702			0.635902	0.390155	0.57923	0.500144	0.53919	0.709	0.412	0.635	0.710466	0.509029	0.683806	0.819886	0.600247	0.681	0.341	0.638	0.788
0.125291	0.189956	0.250666	0.268184	0.161021	0.179048	0.195253	0.202005	0.156823	0.32276			0.387321	0.514059	0.521632	0.438513	0.293662	0.302489	0.641	0.339	0.697	0.482472	0.445735	0.289419	0.436368	0.39654	0.487519	0.611	0.343	0.654			0.564217	0.560968	0.637938	0.472304	0.516837	0.768	0.42	0.658	0.730281	0.498811	0.634684	0.646466	0.806956	0.686	0.513	0.676	0.815
0.148557	0.190938	0.240812	0.263275	0.14096	0.184426	0.18253	0.202336	0.166636	0.358576			0.398917	0.454381	0.316758	0.402828	0.326883	0.293318	0.663	0.377	0.823	0.490561	0.554292	0.33794	0.486832	0.353753	0.466933	0.594	0.386	0.532			0.52363	0.454713	0.613987	0.445727	0.790136	0.703	0.439	0.655	0.597418	0.500299	0.533008	0.461478	0.698512	0.756	0.605	0.512	0.786
0.126732	0.183534	0.229442	0.27213	0.125141	0.167434	0.184996	0.214034	0.16233	0.413106			0.415118	0.408827	0.318218	0.42444	0.374554	0.326761	0.643	0.367	0.631	0.412756	0.579729	0.353607	0.362301	0.346847	0.475323	0.621	0.438	0.479			0.646675	0.420386	0.563157	0.705487	0.903855	0.649	0.435	0.674	0.687411	0.546906	0.567606	0.466838	0.627446	0.734	0.706	0.539	0.771
0.134247	0.266158	0.17265	0.253144	0.142135	0.17128	0.228895	0.193427	0.163946	0.34828			0.367379	0.398185	0.324213	0.542034	0.37805	0.336105	0.609	0.446	0.615	0.471748	0.546264	0.336653	0.317497	0.505984	0.417643	0.552	0.403	0.38			0.605801	0.392468	0.517289	0.715002	0.74491	0.735	0.459	0.664	0.557593	0.612347	0.454691	0.400177	0.611629	0.644	0.472	0.519	0.668
0.116912	0.318355	0.23052	0.25324	0.151273	0.162458	0.210051	0.188602	0.176003	0.232217			0.443451	0.363612	0.355796	0.47397	0.462688	0.31856	0.763	0.554	0.551	0.418348	0.620266	0.51649	0.350029	0.533794	0.436559	0.68	0.39	0.404			0.615101	0.446739	0.506651	0.670517	0.76501	0.693	0.437	0.653	0.484262	0.610183	0.423249	0.416984	0.655194	0.669	0.374	0.544	0.685
0.157817	0.190446	0.237565	0.220056	0.162109	0.199942	0.205599	0.189741	0.14586	0.199101			0.42881	0.360925	0.361691	0.273424	0.489125	0.309075	0.633	0.478	0.57	0.51377	0.6226	0.445382	0.349994	0.353411	0.474035	0.689	0.324	0.526			0.599994	0.358492	0.561735	0.584547	0.650972	0.721	0.56	0.812	0.496787	0.759475	0.499266	0.492631	0.633675	0.693	0.387	0.534	0.629
0.146448	0.184571	0.219433	0.193925	0.159137	0.322961	0.211789	0.182452	0.165855	0.190185			0.457519	0.337682	0.366634	0.400134	0.453482	0.276431	0.56	0.443	0.535	0.461387	0.732857	0.412083	0.374218	0.400958	0.302443	0.657	0.45	0.463			0.581148	0.420339	0.581894	0.49184	0.746456	0.704	0.405	0.86	0.448264	0.657422	0.525703	0.571309	0.568684	0.872	0.357	0.527	0.776
0.192229	0.21159	0.238692	0.193729	0.151951	0.194454	0.221275	0.24848	0.161587	0.166485			0.41907	0.376318	0.390832	0.420823	0.403767	0.359842	0.597	0.386	0.523	0.466168	0.524952	0.441247	0.526916	0.448432	0.276798	0.768	0.499	0.601			0.581132	0.408363	0.636749	0.420924	0.656214	0.641	0.492	0.822	0.533934	0.733967	0.573917	0.467796	0.537315	0.957	0.401	0.465	0.593
0.189795	0.188319	0.241958	0.21116	0.172428	0.149104	0.205799	0.275911	0.212395	0.165195			0.380908	0.472868	0.327257	0.471813	0.466762	0.322184	0.535	0.466	0.501	0.493408	0.592461	0.273469	0.466907	0.48627	0.30575	0.717	0.491	0.533			0.58085	0.407504	0.720099	0.437663	0.59863	0.767	0.358	0.799	0.521137	0.681629	0.465414	0.627287	0.494688	0.969	0.356	0.551	0.677
0.177434	0.233437	0.229081	0.189866	0.158442	0.190435	0.229117	0.300878	0.237988	0.146583			0.375276	0.49547	0.37504	0.385151	0.322661	0.268341	0.622	0.453	0.525	0.447262	0.439099	0.288069	0.451232	0.645975	0.316064	0.79	0.443	0.495			0.660133	0.415426	0.780446	0.401012	0.448686	0.762	0.527	0.743	0.445675	0.701649	0.54187	0.576378	0.422774	0.911	0.376	0.513	0.655
0.169816	0.255444	0.211273	0.175592	0.165994	0.211075	0.1634	0.350065	0.292064	0.144148			0.484514	0.503678	0.607154	0.412727	0.387745	0.348955	0.66	0.597	0.51	0.465568	0.399726	0.239753	0.379036	0.536388	0.349621	0.826	0.441	0.521			0.768074	0.526109	0.677273	0.502018	0.436217	0.745	0.521	0.693	0.512579	0.783539	0.393464	0.57321	0.435522	0.967	0.385	0.494	0.619
0.173329	0.325534	0.212107	0.175657	0.162805	0.224022	0.237455	0.346901	0.169992	0.152268			0.297735	0.427378	0.624194	0.356995	0.358302	0.406224	0.487	0.344	0.625	0.46592	0.428385	0.230269	0.418138	0.322404	0.318983	0.655	0.426	0.533			0.583488	0.512354	0.694955	0.526595	0.495754	0.68	0.534	0.706	0.48614	0.637994	0.426483	0.52694	0.474135	0.972	0.357	0.489	0.642
0.181296	0.197892	0.317638	0.165574	0.187151	0.221497	0.238284	0.355842	0.266611	0.167479			0.323293	0.51393	0.601634	0.448159	0.410249	0.433286	0.523	0.356	0.721	0.400395	0.3617	0.299763	0.405481	0.377734	0.339653	0.798	0.384	0.247			0.658934	0.59452	0.785829	0.468243	0.466709	0.739	0.615	0.581	0.492759	0.674559	0.505259	0.637117	0.636996	0.83	0.381	0.503	0.778
0.12349	0.178883	0.224857	0.161897	0.172466	0.182761	0.283292	0.339456	0.32319	0.134812			0.348527	0.51292	0.347548	0.385996	0.355828	0.451716	0.517	0.421	0.677	0.560141	0.429147	0.268425	0.37096	0.454983	0.365449	0.741	0.406	0.455			0.763483	0.654778	0.831353	0.475425	0.49297	0.758	0.568	0.578	0.495077	0.500385	0.500851	0.521967	0.548503	0.843	0.561	0.512	0.902
0.190807	0.193078	0.197124	0.157554	0.15859	0.148608	0.214586	0.246056	0.172623	0.148429			0.338752	0.374083	0.287544	0.557406	0.39234	0.391179	0.482	0.479	0.715	0.416471	0.281374	0.283758	0.465289	0.405973	0.34738	0.783	0.404	0.546			0.677223	0.647278	0.81466	0.442469	0.475414	0.865	0.557	0.544	0.458946	0.465533	0.537533	0.523264	0.49324	0.793	0.634	0.512	0.79
0.349124	0.189066	0.222032	0.150778	0.15535	0.188001	0.235175	0.21319	0.155985	0.148052			0.35163	0.512217	0.300479	0.354546	0.263113	0.4003	0.504	0.338	0.576	0.411993	0.382126	0.251919	0.340322	0.43554	0.258193	0.609	0.441	0.461			0.73632	0.637498	0.526958	0.44689	0.567932	0.884	0.62	0.58	0.488946	0.545887	0.581131	0.547334	0.485881	0.815	0.502	0.492	0.828
0.310009	0.243716	0.200894	0.199287	0.157845	0.285876	0.224644	0.209423	0.14462	0.156573			0.456061	0.385591	0.299402	0.441872	0.285493	0.411842	0.491	0.363	0.576	0.500145	0.405162	0.361134	0.334327	0.41965	0.293726	0.603	0.427	0.476			0.621163	0.570889	0.52345	0.47024	0.527437	0.861	0.512	0.592	0.623044	0.518648	0.648809	0.562518	0.416562	0.675	0.627	0.793	0.829
0.276191	0.283206	0.198235	0.166215	0.145004	0.231795	0.132685	0.196237	0.194974	0.192278			0.464713	0.484186	0.312236	0.441687	0.312724	0.384505	0.484	0.37	0.452	0.370975	0.386925	0.463626	0.576742	0.502915	0.269111	0.533	0.389	0.48			0.540115	0.374743	0.542147	0.404931	0.526642	0.985	0.472	0.542	0.631689	0.540416	0.624968	0.572753	0.483442	0.7	0.363	0.786	0.865
0.226028	0.153045	0.177976	0.213579	0.241247	0.205758	0.172775	0.191761	0.188589	0.279431			0.421819	0.403046	0.347285	0.524739	0.327634	0.392831	0.525	0.396	0.505	0.506871	0.401043	0.429619	0.494929	0.425798	0.255417	0.596	0.38	0.353			0.572242	0.444642	0.535392	0.354343	0.511156	0.91	0.537	0.656	0.635534	0.559791	0.629282	0.694433	0.514277	0.674	0.696	0.698	0.646
0.307969	0.152398	0.227867	0.209433	0.301225	0.149368	0.1735	0.194703	0.143441	0.251382			0.574482	0.425417	0.335655	0.523363	0.339546	0.427996	0.49	0.395	0.516	0.316139	0.426932	0.501388	0.605109	0.374797	0.322973	0.546	0.48	0.491			0.630127	0.495336	0.510929	0.438394	0.419344	0.911	0.583	0.59	0.6237	0.480571	0.689762	0.544489	0.55766	0.696	0.395	0.658	0.734
0.286584	0.187079	0.312423	0.206824	0.202083	0.149157	0.18196	0.263233	0.206875	0.167121			0.520285	0.408681	0.39216	0.395579	0.328219	0.44469	0.461	0.358	0.489	0.487488	0.384397	0.41872	0.480617	0.505021	0.352143	0.51	0.509	0.58			0.650725	0.382577	0.568999	0.42439	0.512962	0.795	0.396	0.576	0.648381	0.486428	0.643915	0.42645	0.594068	0.644	0.389	0.666	0.657
0.242945	0.162435	0.334629	0.162401	0.139723	0.170292	0.200794	0.23207	0.278956	0.161126			0.289482	0.493649	0.359524	0.523141	0.481409	0.432457	0.546	0.403	0.496	0.470612	0.387862	0.4549	0.386659	0.522463	0.320151	0.648	0.33	0.251			0.554949	0.43461	0.582218	0.601962	0.491436	0.792	0.461	0.794	0.709194	0.512428	0.724724	0.592318	0.556524	0.65	0.366	0.549	0.625
0.236113	0.157973	0.428021	0.143168	0.224857	0.194528	0.183345	0.191552	0.285432	0.149653			0.371518	0.41333	0.337002	0.305807	0.350206	0.308372	0.509	0.339	0.459	0.365935	0.499559	0.356411	0.303147	0.607754	0.318834	0.591	0.353	0.539			0.563915	0.449252	0.550787	0.540452	0.505162	0.707	0.46	0.688	0.552724	0.583897	0.741329	0.464064	0.578761	0.628	0.311	0.463	0.663
