# Supplementary figures and images for: Cold-induced hyperphagia requires AgRP neuron activation in mice
Source: eLife journal article supplement (doi:10.7554/elife.58764), 2020-12-15

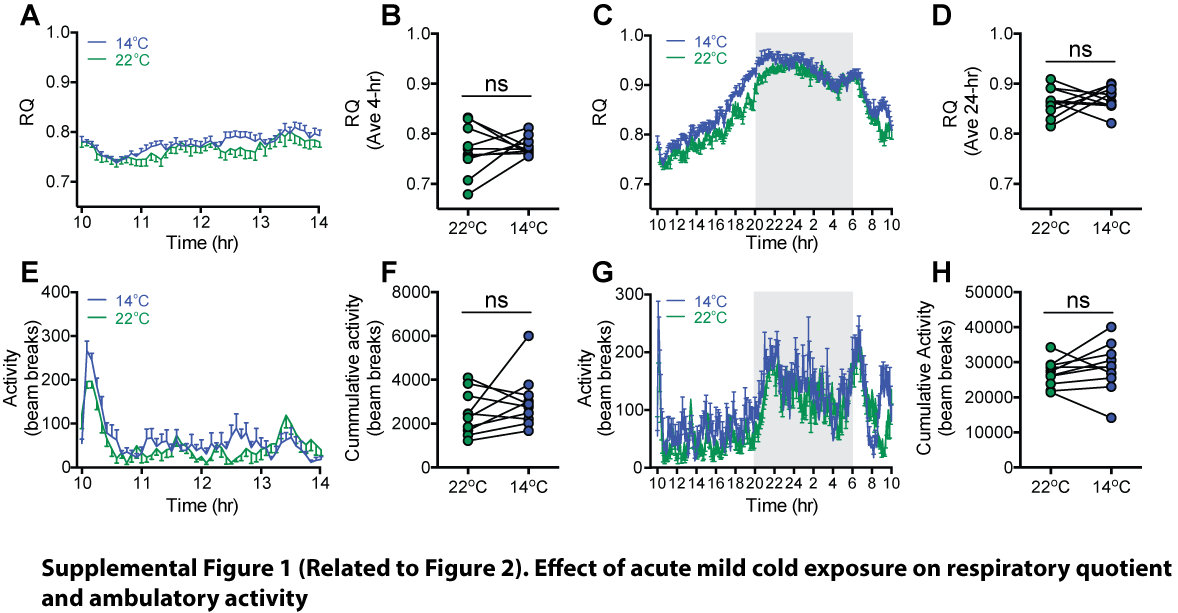

Supplement: supp [file elife-58764-supp-v1.zip › elife_poa_e58764_Figure_2_figure_supplement_1.tif]

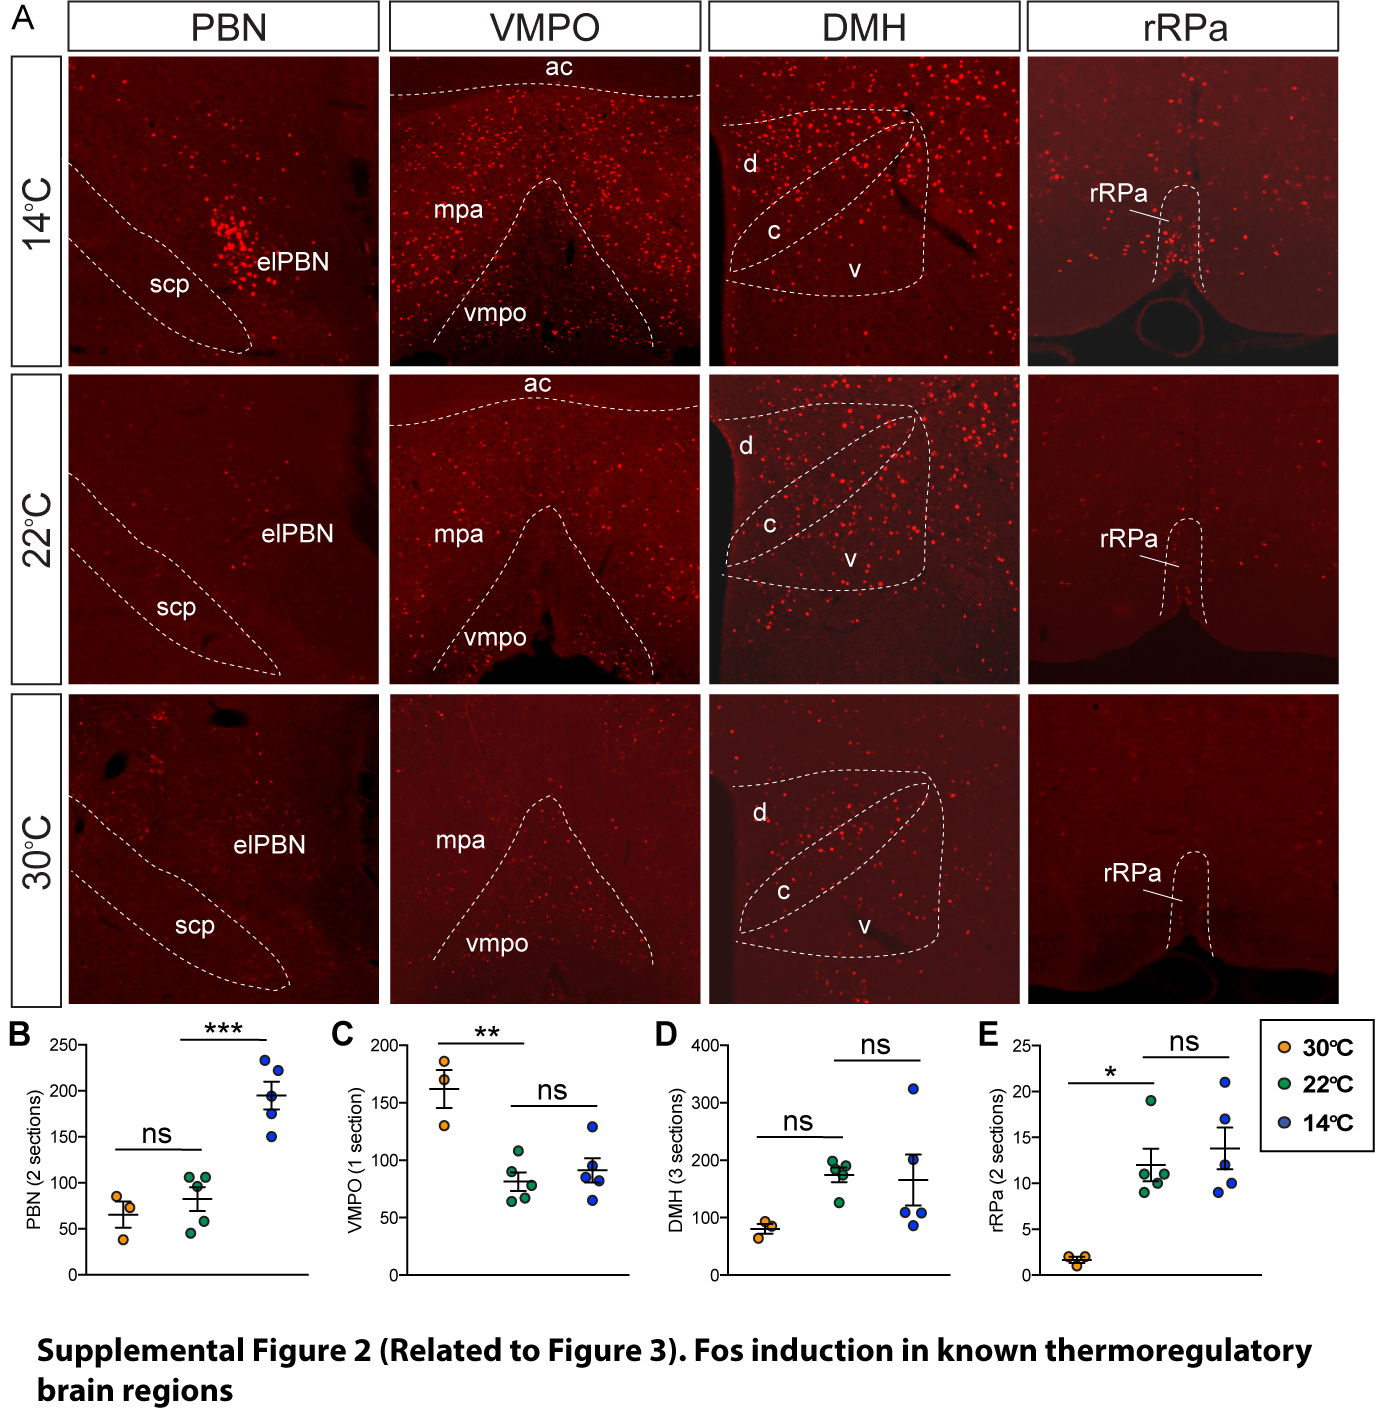

Supplement: supp [file elife-58764-supp-v1.zip › elife_poa_e58764_Figure_3_figure_supplement_1.tif]

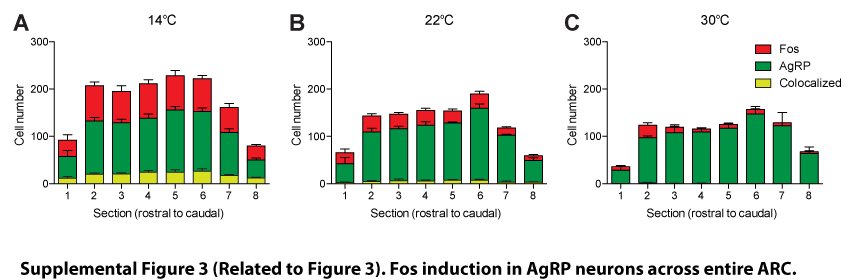

Supplement: supp [file elife-58764-supp-v1.zip › elife_poa_e58764_Figure_3_figure_supplement_2.tif]

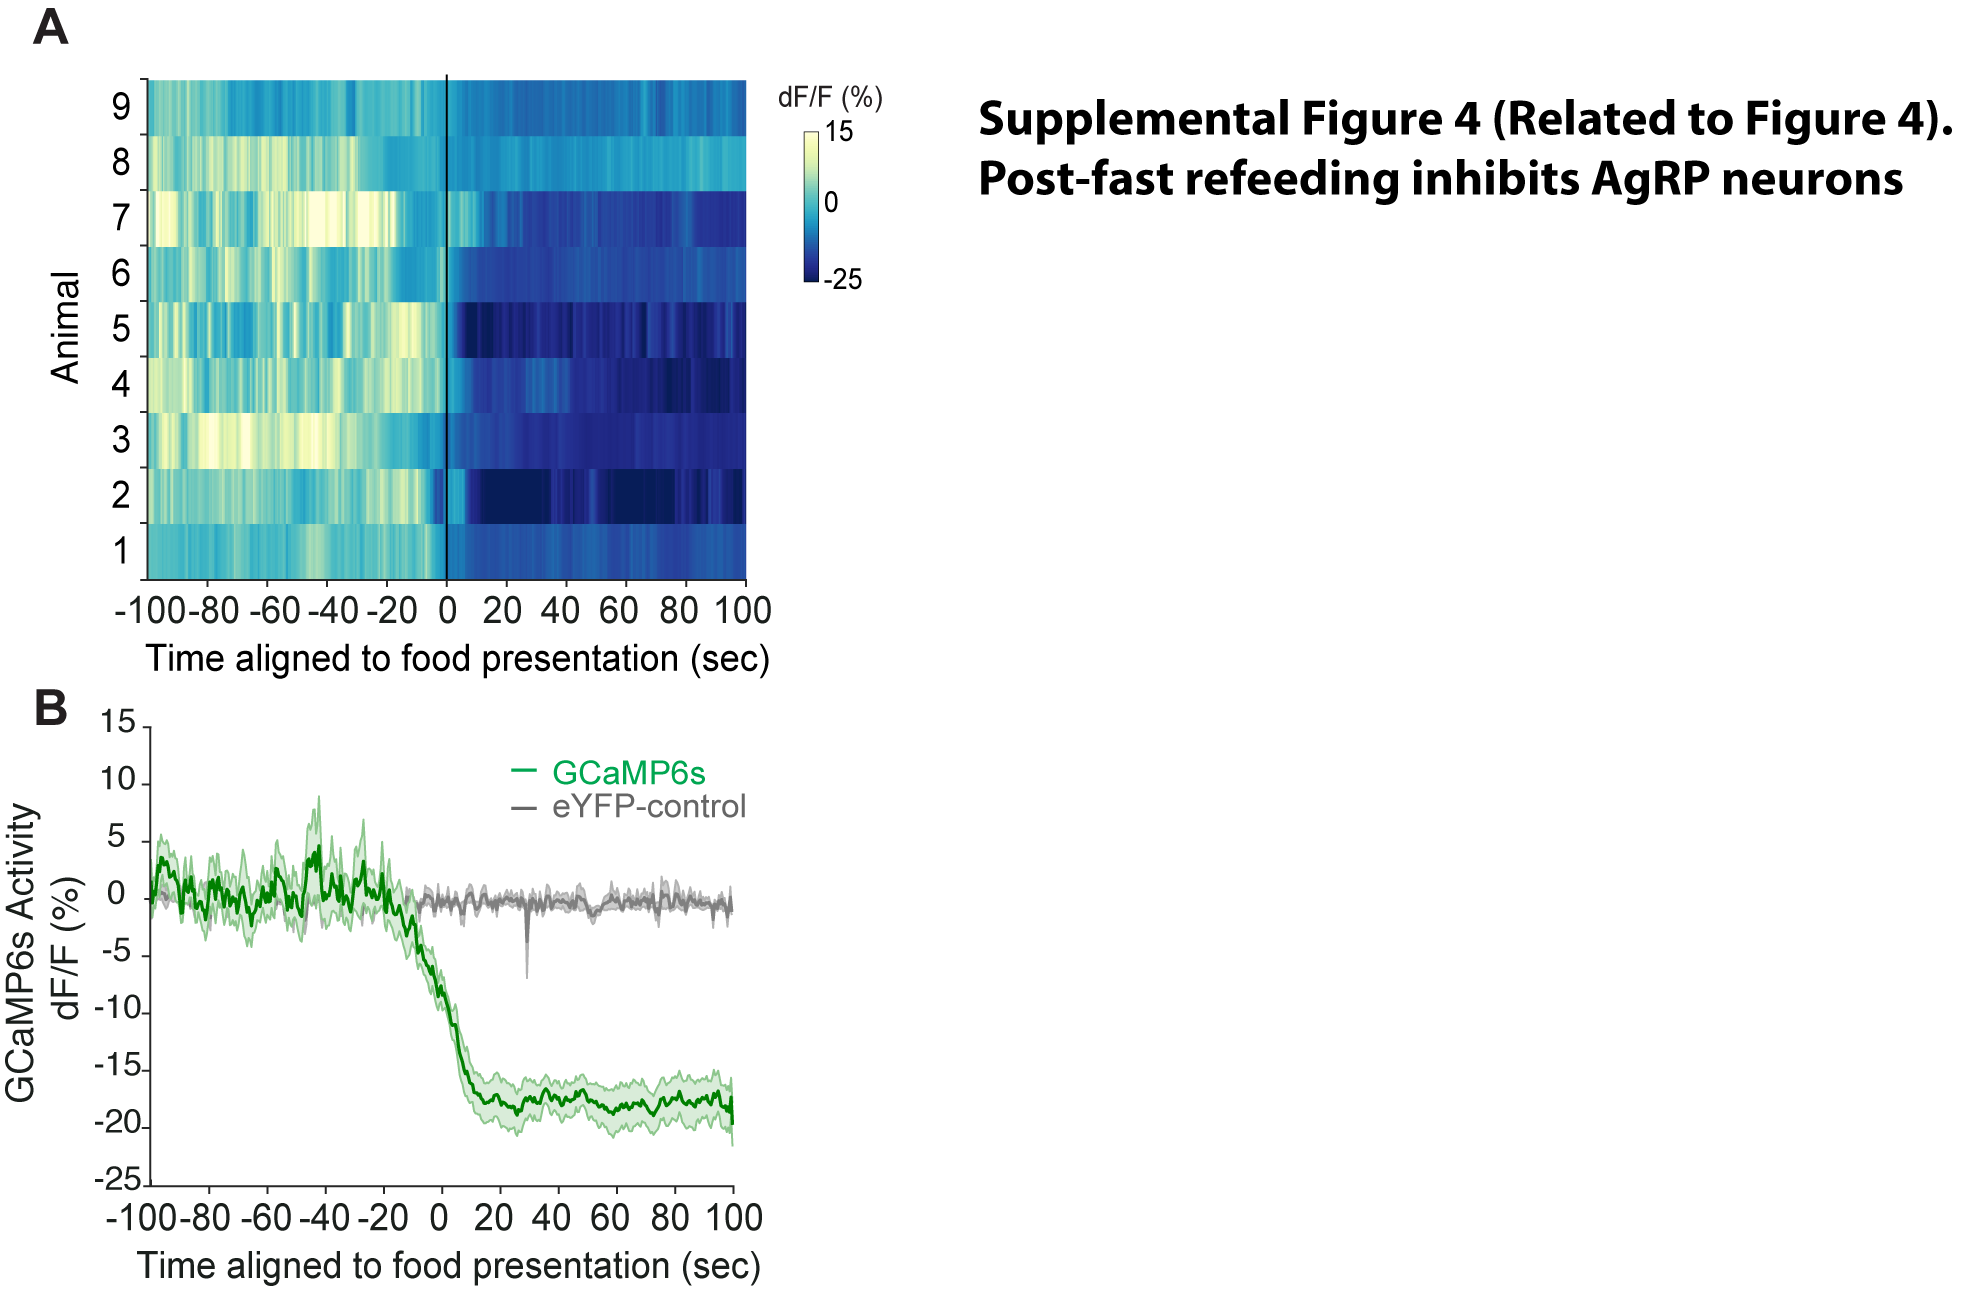

Supplement: supp [file elife-58764-supp-v1.zip › elife_poa_e58764_Figure_4_figure_supplement_1.tif]

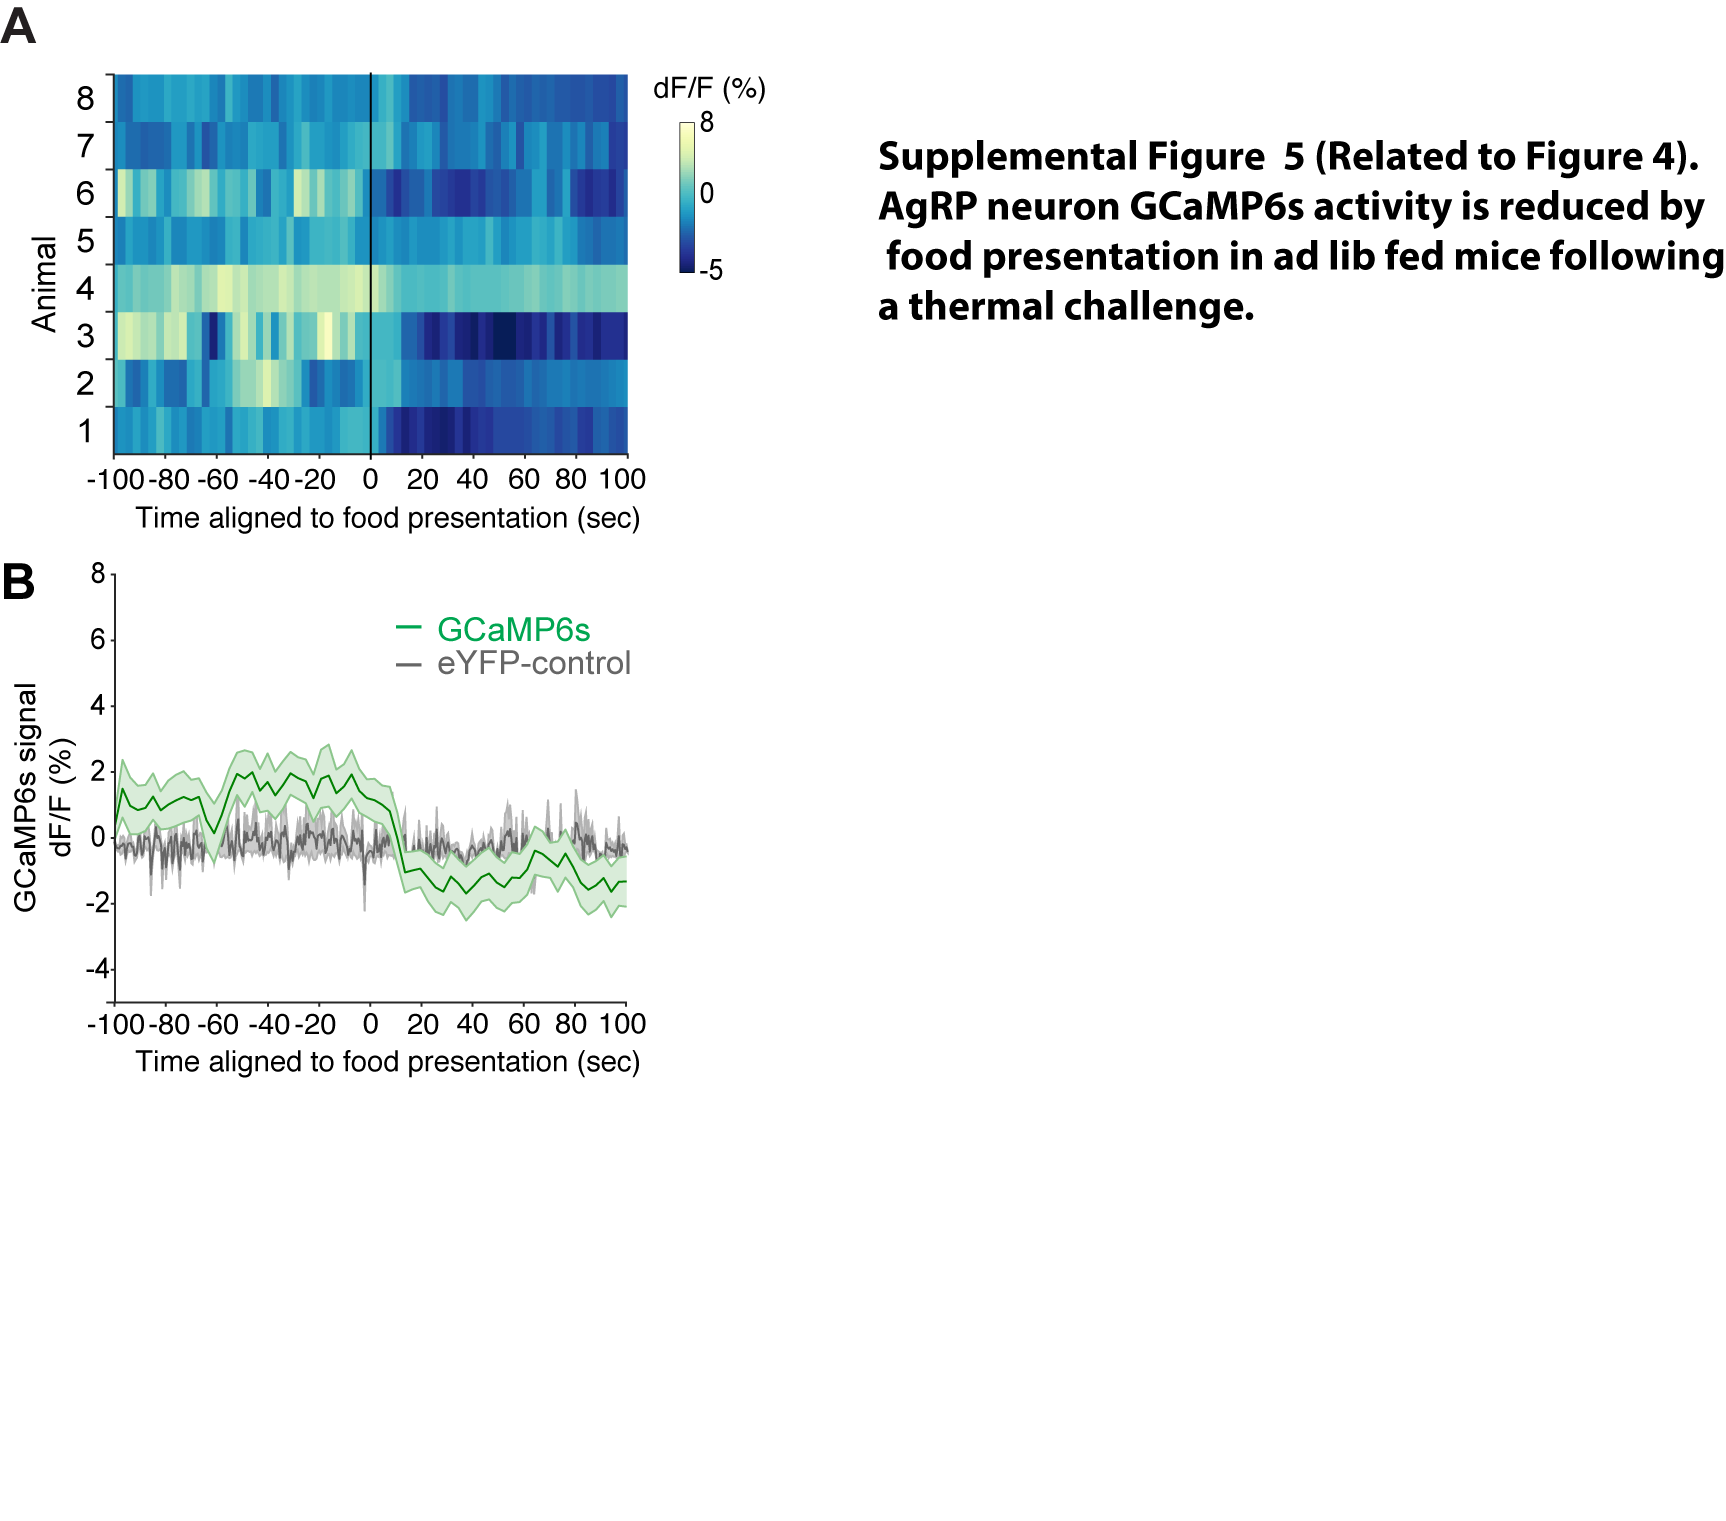

Supplement: supp [file elife-58764-supp-v1.zip › elife_poa_e58764_Figure_4_figure_supplement_2.tif]

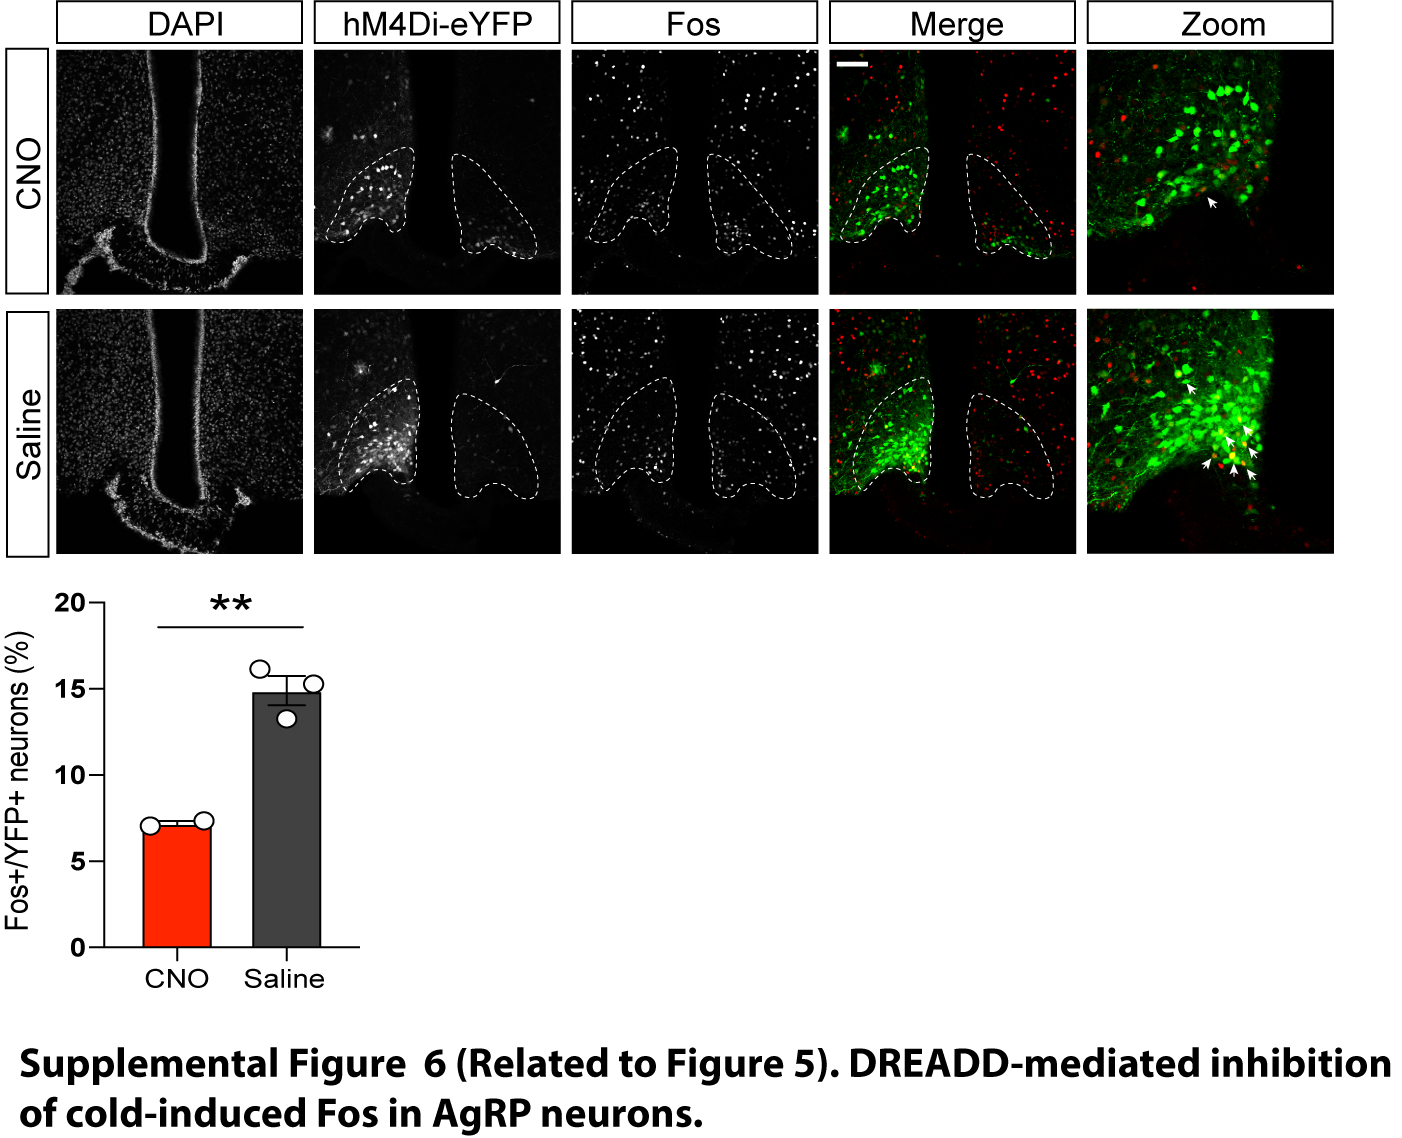

Supplement: supp [file elife-58764-supp-v1.zip › elife_poa_e58764_Figure_5_figure_supplement_1.tif]

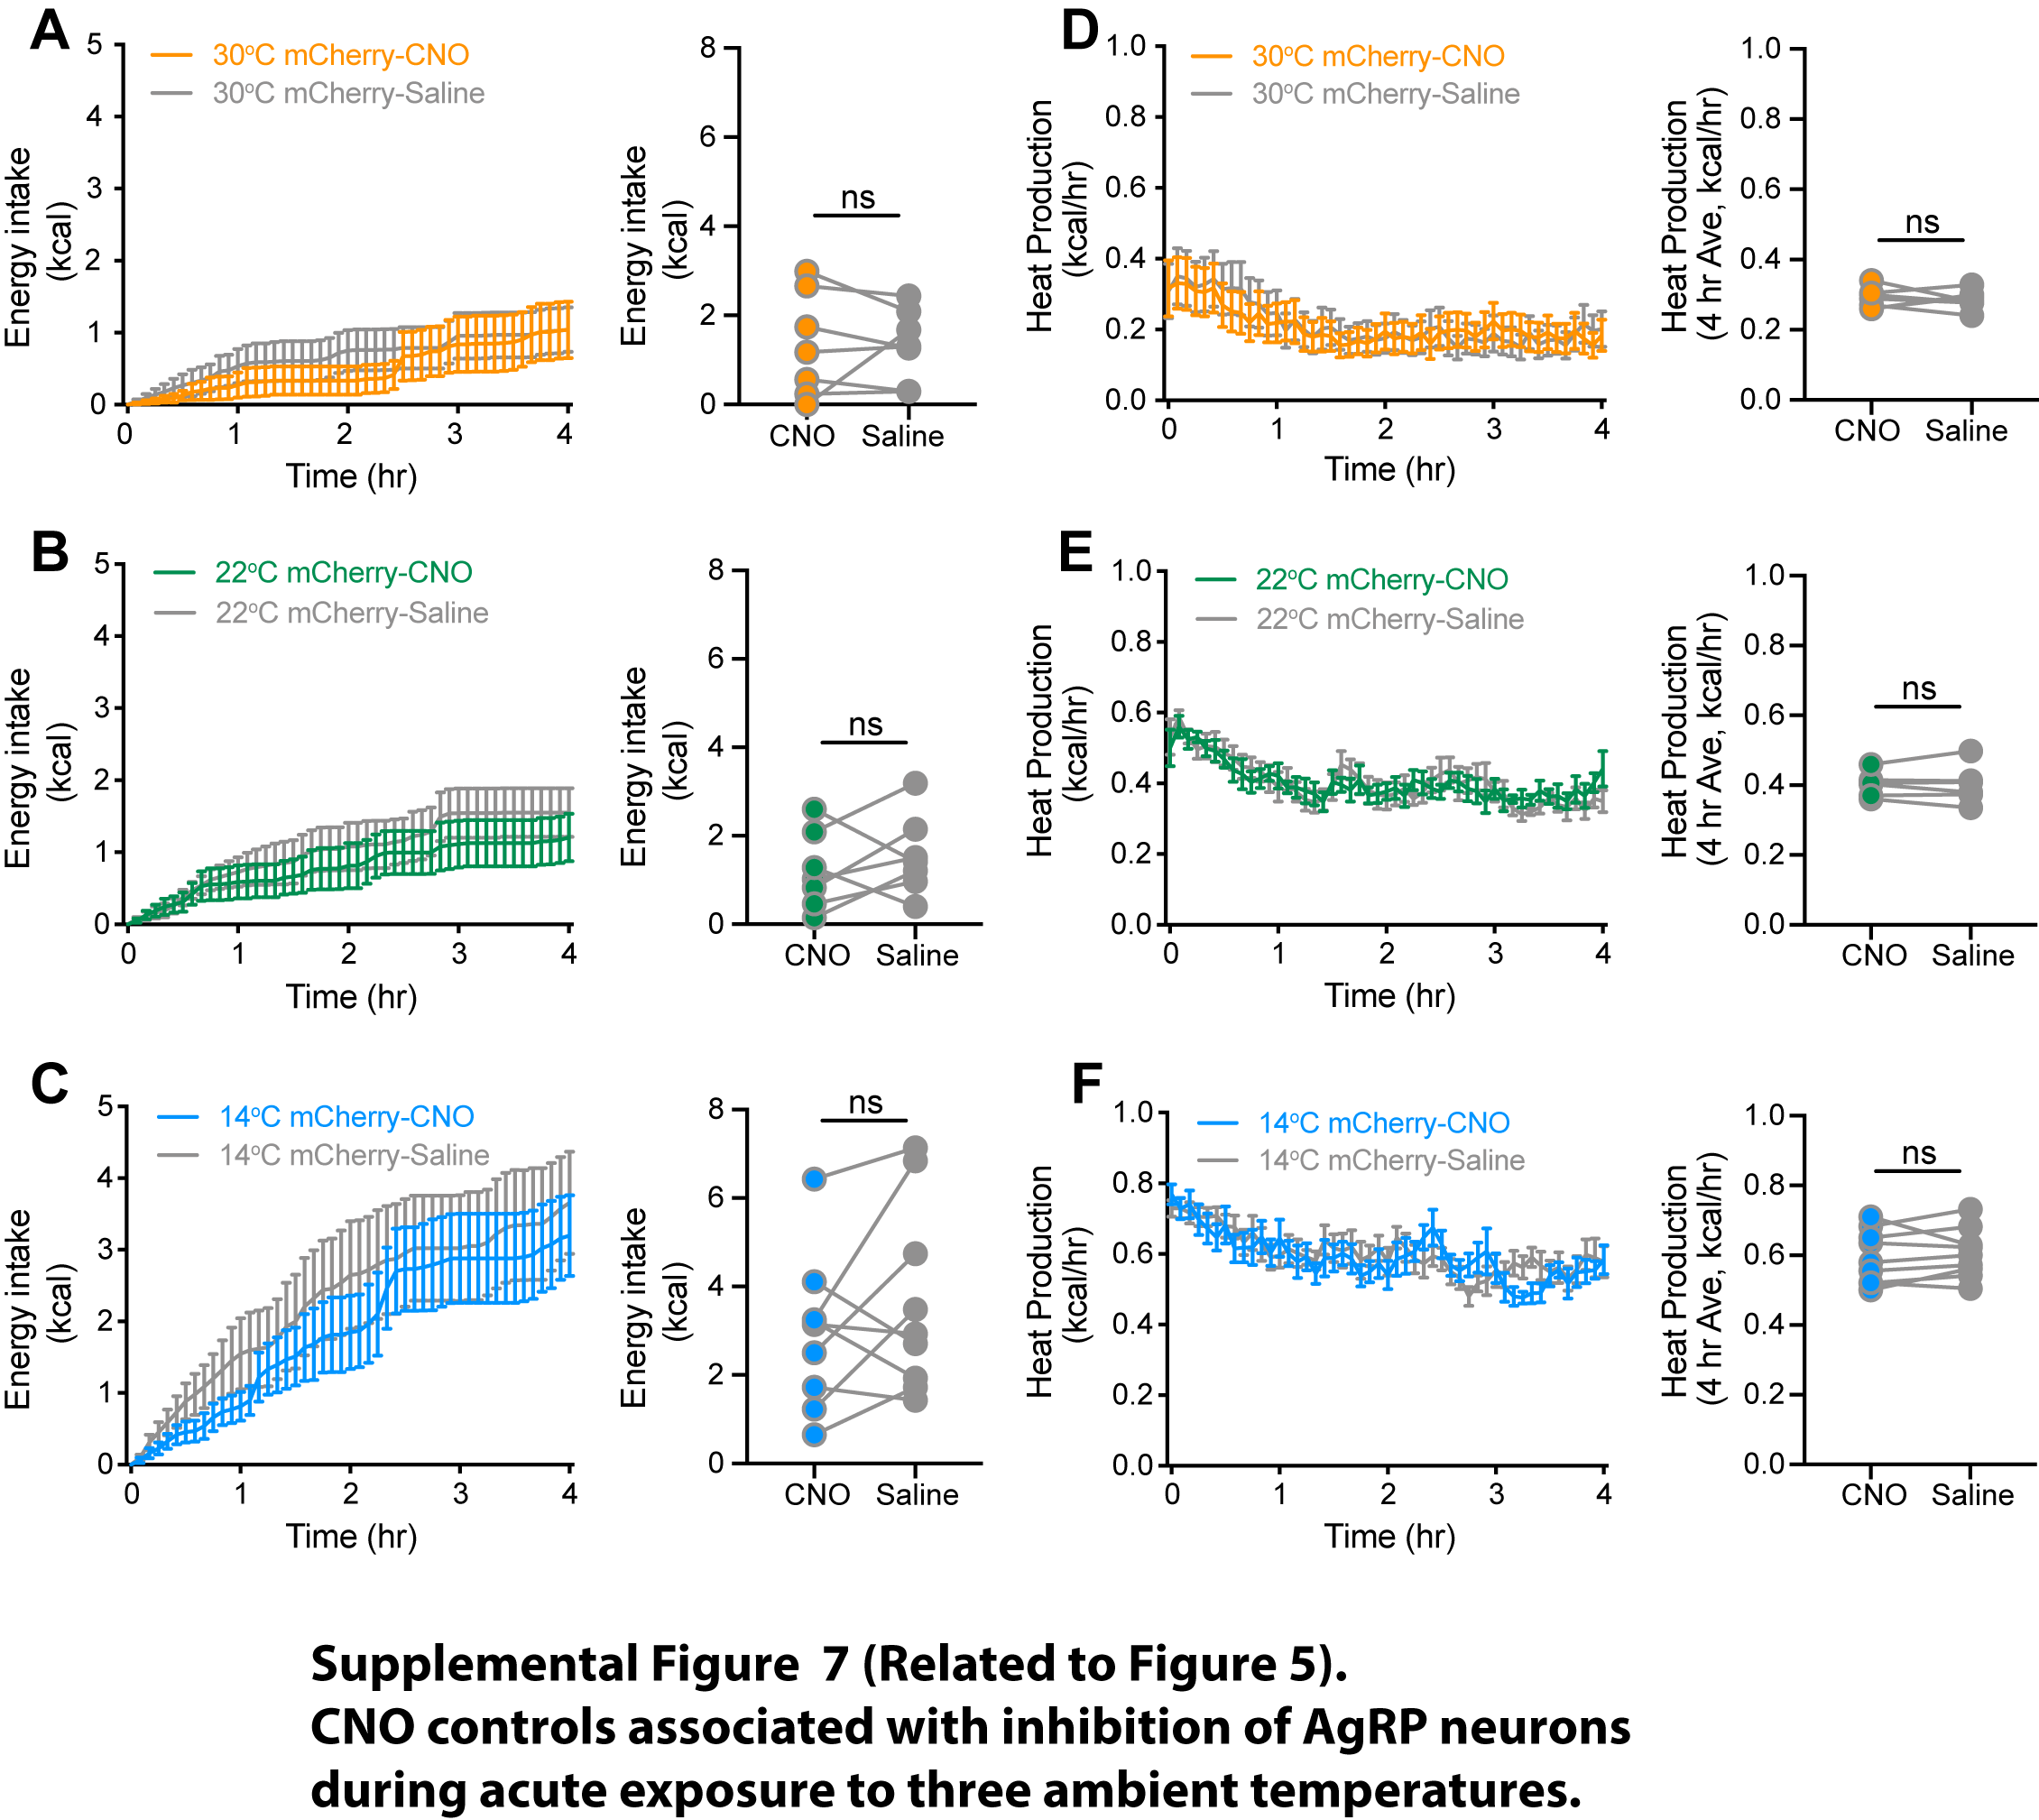

Supplement: supp [file elife-58764-supp-v1.zip › elife_poa_e58764_Figure_5_figure_supplement_2.tif]

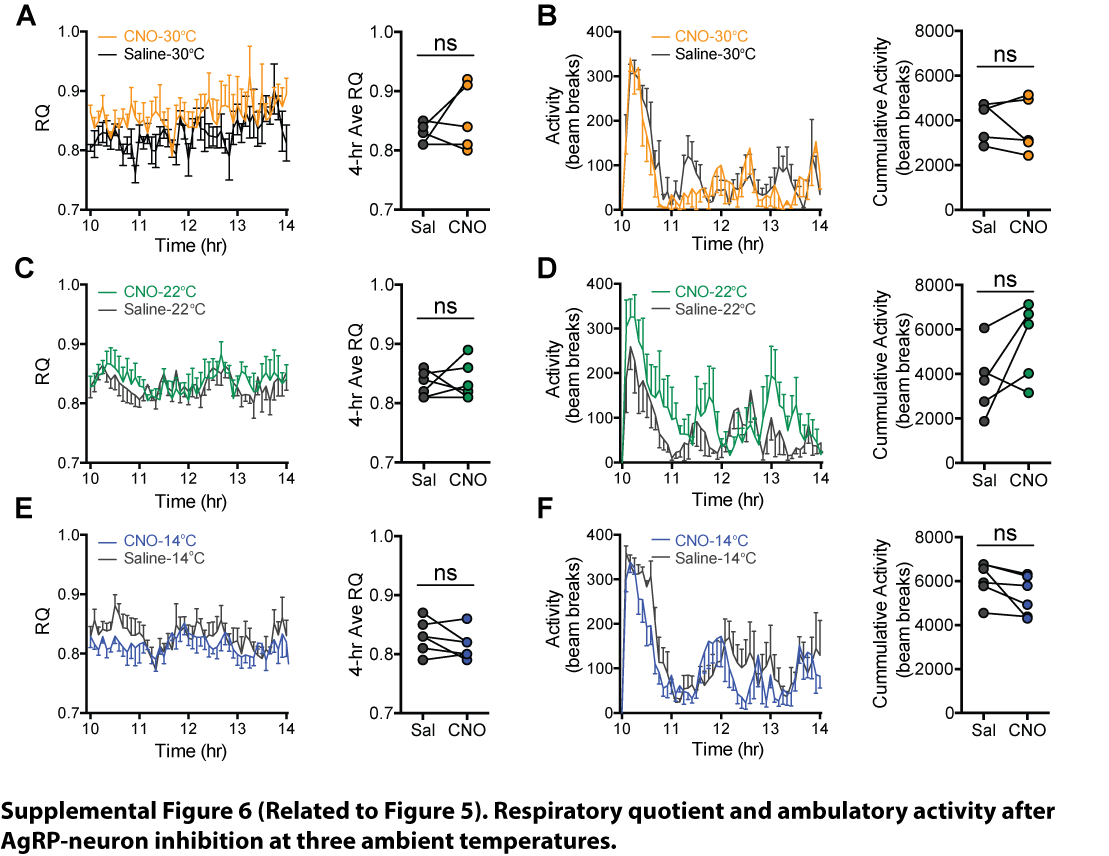

Supplement: supp [file elife-58764-supp-v1.zip › elife_poa_e58764_Figure_5_figure_supplement_3.tif]
